# Supplementary material for: Reconstruction of Monocyte Transcriptional Regulatory Network Accompanies Monocytic Functions in Human Fibroblasts
Source: PubMed Central journal article supplement (PMC3302774; doi:10.1371/journal.pone.0033474), 2012-03-13
Supplement: pone.0033474.s003.pdf [file pone.0033474.s003.pdf]

Table S1 TF/Monocyte co-occurrence

| gene_name | Number of co-occurrence |
|-----------|-------------------------|
| TNF       | 1,859                   |
| IL6       | 1,068                   |
| CCL2      | 931                     |
| IL1B      | 720                     |
| IL4       | 618                     |
| IL2       | 595                     |
| IL10      | 575                     |
| CD4       | 559                     |
| JUN       | 550                     |
| CD14      | 536                     |
| NDUFA2    | 536                     |
| FOS       | 526                     |
| CD40      | 456                     |
| MAPK1     | 427                     |
| JUNB      | 395                     |
| JUND      | 394                     |
| FOSB      | 392                     |
| GRAP2     | 361                     |
| CSF3      | 351                     |
| MAPK14    | 351                     |
| JTV1      | 351                     |
| AHSA1     | 351                     |
| CD8A      | 340                     |
| CD34      | 329                     |
| IL3       | 318                     |
| SYT1      | 286                     |
| GORASP1   | 286                     |
| HSAJ2425  | 286                     |
| ITGAM     | 261                     |
| CCL5      | 242                     |
| CD86      | 224                     |
| LBR       | 219                     |
| LAMC2     | 207                     |
| TH1L      | 198                     |
| IMPACT    | 189                     |
| CD80      | 175                     |
| CD40LG    | 172                     |
| ARHGEF7   | 171                     |

|          |     |
|----------|-----|
| ITGB2    | 170 |
| CD46     | 165 |
| CAPG     | 160 |
| C1orf132 | 160 |
| TAT      | 154 |
| PKC      | 149 |
| TLR4     | 149 |
| PTPRC    | 147 |
| IFNA1    | 147 |
| SPI1     | 143 |
| TNFSF11  | 143 |
| APC      | 142 |
| KIT      | 139 |
| SET      | 138 |
| CD19     | 129 |
| CAMP     | 129 |
| CD1C     | 128 |
| CD2      | 125 |
| CD1B     | 125 |
| IL13     | 125 |
| CD1A     | 124 |
| CD83     | 119 |
| PSG1     | 117 |
| DAND5    | 117 |
| SP1      | 117 |
| CSF1R    | 115 |
| CD68     | 112 |
| ITGAX    | 111 |
| CD1D     | 111 |
| FCGR3A   | 110 |
| PTGS2    | 109 |
| FCGR3B   | 109 |
| MYC      | 108 |
| ITGAL    | 107 |
| STAT1    | 106 |
| ISG20    | 105 |
| IL2RA    | 104 |
| CD1E     | 104 |
| FCER2    | 102 |
| TLR2     | 102 |

|           |     |
|-----------|-----|
| CD33      | 101 |
| IL5       | 100 |
| KRT20     | 98  |
| MS4A1     | 98  |
| FANCB     | 95  |
| CXCL10    | 95  |
| STAT3     | 94  |
| HSPA9     | 93  |
| CSH1      | 93  |
| ERCC8     | 93  |
| BCL2      | 91  |
| APCS      | 89  |
| MMP9      | 89  |
| SRC       | 87  |
| PAFAH1B1  | 86  |
| YWHAE     | 86  |
| CD36      | 86  |
| ICAM1     | 85  |
| IL9       | 84  |
| NR3C2     | 83  |
| CCR2      | 83  |
| NCAM1     | 81  |
| GPI       | 79  |
| CD28      | 79  |
| ADCY10    | 78  |
| SCYL1     | 74  |
| RPSA      | 74  |
| TP63      | 73  |
| CD9       | 72  |
| ARHGEF2   | 71  |
| PSMD7     | 71  |
| EBNA1BP2  | 71  |
| LANCL1    | 71  |
| RABEPK    | 71  |
| LOC440258 | 71  |
| LOC440264 | 71  |
| MGC33556  | 71  |
| CCR5      | 71  |
| IL8RA     | 71  |
| IL15      | 70  |

|           |    |
|-----------|----|
| PECAM1    | 69 |
| MIPEP     | 69 |
| CAT       | 68 |
| DDX41     | 68 |
| TNPO1     | 68 |
| MIP       | 68 |
| FAS       | 67 |
| CXCR4     | 67 |
| LTBR      | 67 |
| TRAF2     | 64 |
| CD38      | 63 |
| DECY1     | 62 |
| FUT4      | 61 |
| EPO       | 60 |
| FAT       | 60 |
| ANPEP     | 60 |
| TNFRSF1A  | 60 |
| SLURP1    | 60 |
| REL       | 59 |
| IL7       | 58 |
| CYP27B1   | 58 |
| IL18      | 57 |
| VDR       | 57 |
| TNFRSF11A | 56 |
| ACP5      | 53 |
| TDRD7     | 53 |
| CD44      | 52 |
| SOD1      | 52 |
| NRSN1     | 52 |
| MYB       | 51 |
| MLL       | 51 |
| TPPP      | 51 |
| FCGR1A    | 51 |
| CR2       | 50 |
| HBA1      | 50 |
| ANG       | 50 |
| FLT3      | 49 |
| CD69      | 49 |
| AICDA     | 48 |
| TP53      | 47 |

|          |    |
|----------|----|
| CEL      | 47 |
| UBASH3B  | 47 |
| MME      | 46 |
| CD5      | 46 |
| CEBPB    | 46 |
| S100A9   | 44 |
| CISH     | 44 |
| FPR1     | 44 |
| S100B    | 43 |
| FCGR1B   | 43 |
| FCGR1C   | 43 |
| JAG1     | 42 |
| PSIP1    | 42 |
| NLRP1    | 42 |
| SPN      | 41 |
| TNFRSF1B | 41 |
| GLI2     | 41 |
| STAT5A   | 40 |
| TFRC     | 40 |
| PARP9    | 40 |
| CUX1     | 40 |
| MYD88    | 40 |
| RELA     | 40 |
| NA       | 40 |
| SOS1     | 39 |
| S100A8   | 39 |
| PTK2B    | 39 |
| KIAA0101 | 39 |
| C11orf6  | 38 |
| PIGS     | 38 |
| CDKN1A   | 38 |
| PIK3CG   | 38 |
| PIK3CA   | 38 |
| PIK3CB   | 38 |
| ARID1B   | 38 |
| ARID3A   | 38 |
| CDK5R1   | 38 |
| ERG      | 38 |
| CCL7     | 38 |
| HAL      | 37 |

|          |    |
|----------|----|
| AKR1B10  | 37 |
| LIF      | 37 |
| STAB2    | 37 |
| FSCN1    | 37 |
| PIK3R3   | 37 |
| PSMD12   | 37 |
| IL8      | 37 |
| ABL1     | 36 |
| NOL3     | 36 |
| CR1      | 36 |
| IRF1     | 36 |
| NFATC1   | 36 |
| SERPINE1 | 36 |
| HGF      | 35 |
| TNFSF13B | 35 |
| C5AR1    | 35 |
| TPO      | 34 |
| TCEAL1   | 34 |
| D4S234E  | 34 |
| KDR      | 34 |
| FCGRT    | 34 |
| CSRP1    | 34 |
| CRP      | 34 |
| PPIAP10  | 34 |
| SIGLEC7  | 34 |
| THPO     | 33 |
| FASTK    | 33 |
| STAT5B   | 33 |
| FUT1     | 32 |
| BCL2L1   | 32 |
| MPO      | 32 |
| CD58     | 32 |
| RELB     | 32 |
| IL12A    | 32 |
| ACE      | 32 |
| CCR1     | 32 |
| ARMC9    | 31 |
| JAK2     | 31 |
| ELK3     | 31 |
| EPHB1    | 31 |

|         |    |
|---------|----|
| MLC1    | 31 |
| DYM     | 31 |
| KRIT1   | 31 |
| DST     | 31 |
| HMOX1   | 31 |
| TIMP1   | 31 |
| SLC6A2  | 30 |
| ARL4C   | 30 |
| ALPK1   | 30 |
| STAT6   | 30 |
| RARA    | 30 |
| FCN2    | 30 |
| GCHFR   | 30 |
| UPK3B   | 30 |
| PLAU    | 30 |
| SPEN    | 29 |
| DUOXA1  | 29 |
| HSD11B1 | 29 |
| FCGR2A  | 29 |
| APOE    | 29 |
| CD7     | 28 |
| MIF     | 28 |
| CTLA4   | 28 |
| ATM     | 28 |
| TRIM63  | 28 |
| RAB40B  | 28 |
| ADIPOQ  | 28 |
| ATN1    | 27 |
| TNFRSF8 | 27 |
| IL11    | 27 |
| PTPN11  | 27 |
| MMRN1   | 27 |
| AMH     | 27 |
| LNPEP   | 27 |
| HIF1A   | 27 |
| CXCL9   | 27 |
| HPD     | 27 |
| CD55    | 27 |
| VSX1    | 27 |
| WISP3   | 27 |

|          |    |
|----------|----|
| CCL22    | 27 |
| VEGFA    | 27 |
| FCGR2B   | 27 |
| TLR3     | 27 |
| CX3CL1   | 27 |
| CDKN2A   | 26 |
| IFI27    | 26 |
| PSMD9    | 26 |
| SSSCA1   | 26 |
| GNPDA1   | 26 |
| NEUROD1  | 26 |
| LYN      | 26 |
| MBOAT4   | 26 |
| TNFSF10  | 26 |
| MAX      | 26 |
| CFP      | 25 |
| IMAGE    | 25 |
| AIR      | 25 |
| HLA-A    | 25 |
| RHOD     | 25 |
| RHO      | 25 |
| TLR9     | 25 |
| ADAM11   | 25 |
| TRAF6    | 25 |
| AGTR1    | 25 |
| TBCC     | 24 |
| DNTT     | 24 |
| REST     | 24 |
| B3GAT1   | 24 |
| FASLG    | 24 |
| BTK      | 24 |
| CCR7     | 24 |
| GALNS    | 24 |
| GAST     | 24 |
| BRD4     | 24 |
| SERPINB6 | 24 |
| PTPLA    | 24 |
| SORBS1   | 24 |
| CAP1     | 24 |
| CTAA1    | 24 |



|           |    |
|-----------|----|
| TNFRSF11B | 24 |
| HSPA4     | 24 |
| CCR3      | 24 |
| FCGR2C    | 24 |
| BCR       | 23 |
| FOXP3     | 23 |
| NOS2A     | 23 |
| CD59      | 23 |
| SAA1      | 23 |
| EIF4E     | 23 |
| ACTB      | 23 |
| IL17A     | 23 |
| IL17F     | 23 |
| IL1A      | 23 |
| PLAUR     | 23 |
| SMCP      | 22 |
| MCS       | 22 |
| CIITA     | 22 |
| SAA       | 22 |
| PAG1      | 22 |
| IRF8      | 22 |
| OPN1LW    | 22 |
| SOCS3     | 22 |
| EGF       | 21 |
| PROM1     | 21 |
| FBXW7     | 21 |
| SYK       | 21 |
| COX8A     | 21 |
| RAF1      | 21 |
| BCGF1     | 21 |
| TEK       | 21 |
| CREBBP    | 21 |
| HSP90B2P  | 21 |
| BTF3L1    | 21 |
| ATP8A2    | 21 |
| CD209     | 21 |
| RAGE      | 21 |
| AGER      | 21 |
| PRKCDBP   | 20 |
| MET       | 20 |

|          |    |
|----------|----|
| IL6ST    | 20 |
| PDC      | 20 |
| IV       | 20 |
| KLK3     | 20 |
| CYBB     | 20 |
| EDA      | 20 |
| PRAP1    | 20 |
| CD163    | 20 |
| MSC      | 19 |
| SLC25A37 | 19 |
| FLNB     | 19 |
| SLTM     | 19 |
| RNMT     | 19 |
| LRPPRC   | 19 |
| NM       | 19 |
| SELL     | 19 |
| IGHG3    | 19 |
| SETD2    | 19 |
| LCS1     | 19 |
| JAK1     | 19 |
| HCK      | 19 |
| RHOA     | 19 |
| USP9Y    | 19 |
| SP3      | 19 |
| SERPINB2 | 19 |
| IRAK1    | 19 |
| SLC33A1  | 19 |
| CCL8     | 19 |
| MYST3    | 19 |
| REG1A    | 18 |
| ABCB6    | 18 |
| ITGB1    | 18 |
| NOS1     | 18 |
| IL23A    | 18 |
| STMN1    | 18 |
| IL3RA    | 18 |
| SEA      | 18 |
| PHB2     | 18 |
| S100A10  | 18 |
| ABCA1    | 18 |

|          |    |
|----------|----|
| TLR7     | 18 |
| FGR      | 18 |
| LY96     | 18 |
| EHHADH   | 18 |
| LBP      | 18 |
| RUNX1    | 17 |
| WASF1    | 17 |
| LCK      | 17 |
| TAG      | 17 |
| TNFAIP3  | 17 |
| POMC     | 17 |
| LCP1     | 17 |
| RNASEH2A | 17 |
| VCAM1    | 17 |
| TLR1     | 17 |
| NR1I2    | 17 |
| TFAP2A   | 17 |
| RET      | 17 |
| IKBKB    | 17 |
| ING1     | 17 |
| MUT      | 17 |
| MPL      | 16 |
| CD22     | 16 |
| BAX      | 16 |
| TNFSF13  | 16 |
| MUC1     | 16 |
| CASP1    | 16 |
| ERVWE1   | 16 |
| AKT1     | 16 |
| GCLC     | 16 |
| UGCG     | 16 |
| PNKD     | 16 |
| TBX21    | 16 |
| FUSE     | 16 |
| ITGA4    | 16 |
| SOCS1    | 16 |
| RARS     | 16 |
| SULT2A1  | 16 |
| CCL4     | 16 |
| FKBP4    | 16 |

|           |    |
|-----------|----|
| TYK2      | 16 |
| CD63      | 16 |
| PGF       | 16 |
| STAT2     | 16 |
| MMP3      | 16 |
| ATF7IP    | 16 |
| SCT       | 15 |
| SHE       | 15 |
| ITGA2B    | 15 |
| EGR3      | 15 |
| CNTN2     | 15 |
| RASA1     | 15 |
| ANP32B    | 15 |
| ADA       | 15 |
| CXCL12    | 15 |
| EXOSC1    | 15 |
| CHL1      | 15 |
| IGKV1-27  | 15 |
| AMACR     | 15 |
| WAS       | 15 |
| ST13      | 15 |
| EP300     | 15 |
| CD52      | 15 |
| CPAMD8    | 15 |
| VIP       | 15 |
| NOVA2     | 15 |
| SMAD3     | 15 |
| CCL20     | 15 |
| SH2B2     | 15 |
| ELA2      | 15 |
| IRF9      | 15 |
| MSR1      | 15 |
| CDK9      | 15 |
| NCF1      | 15 |
| MDDC      | 15 |
| ELOVL6    | 14 |
| MKI67     | 14 |
| RGS6      | 14 |
| MYH14     | 14 |
| KIDINS220 | 14 |

|         |    |
|---------|----|
| WDTC1   | 14 |
| MVD     | 14 |
| HGS     | 14 |
| VWF     | 14 |
| GRB2    | 14 |
| ADRA1D  | 14 |
| CYP2B6  | 14 |
| SLCO6A1 | 14 |
| S100A1  | 14 |
| MYP1    | 14 |
| LPL     | 14 |
| SPP1    | 14 |
| CD48    | 14 |
| CRH     | 14 |
| F9      | 14 |
| CCL3    | 14 |
| DPEP1   | 14 |
| GABPA   | 14 |
| CLEC11A | 14 |
| NFE2L2  | 14 |
| MAP4K4  | 14 |
| TLR5    | 14 |
| PLEK    | 14 |
| NSFL1C  | 14 |
| IGH     | 13 |
| FOXD3   | 13 |
| FANCE   | 13 |
| ALK     | 13 |
| QRSL1   | 13 |
| MTX1    | 13 |
| REG3A   | 13 |
| RPS4X   | 13 |
| MAP6    | 13 |
| SFRS5   | 13 |
| HARS    | 13 |
| SEC14L2 | 13 |
| NUDT6   | 13 |
| GUCY2D  | 13 |
| CLTA    | 13 |
| DNAH8   | 13 |

|          |    |
|----------|----|
| APP      | 13 |
| HSPG2    | 13 |
| PPBP     | 13 |
| DPP4     | 13 |
| FLT1     | 13 |
| IL1RL1   | 13 |
| INDO     | 13 |
| CD81     | 13 |
| P11      | 13 |
| EXOSC6   | 13 |
| XRCC1    | 13 |
| RPE      | 13 |
| AXPC1    | 13 |
| QPCT     | 13 |
| HMGB1    | 13 |
| TANK     | 13 |
| MAPK8    | 13 |
| C1QL1    | 13 |
| CAD      | 13 |
| DFFB     | 13 |
| B4GALNT2 | 13 |
| AIRE     | 13 |
| MAP3K14  | 13 |
| IL16     | 13 |
| IGAN     | 13 |
| TAL1     | 12 |
| PTPN6    | 12 |
| CDKN1B   | 12 |
| MBL2     | 12 |
| CD27     | 12 |
| FBXO8    | 12 |
| FBRS     | 12 |
| SHC1     | 12 |
| SH2D1A   | 12 |
| JAK3     | 12 |
| STUB1    | 12 |
| INPP5D   | 12 |
| MIXL1    | 12 |
| FYN      | 12 |
| CCL21    | 12 |

|           |    |
|-----------|----|
| PARP1     | 12 |
| TNFRSF13B | 12 |
| CYLD      | 12 |
| PML       | 12 |
| IRF6      | 12 |
| PIK3R1    | 12 |
| CXCR3     | 12 |
| CCR6      | 12 |
| SELPLG    | 12 |
| LMNA      | 12 |
| ZHX2      | 12 |
| GOPC      | 12 |
| TNFRSF25  | 12 |
| MS4A2     | 12 |
| EPHA3     | 12 |
| MAPK3     | 12 |
| DYNC1H1   | 12 |
| CCL19     | 12 |
| CCL17     | 12 |
| MAP2K1    | 12 |
| ARC       | 12 |
| LRP1      | 12 |
| NOD2      | 12 |
| CHAF1A    | 12 |
| TREH      | 12 |
| TRNAE1    | 12 |
| RAB3GAP2  | 12 |
| PIK3R4    | 12 |
| CTR9      | 12 |
| CMD1B     | 11 |
| ABCB1     | 11 |
| RRAD      | 11 |
| BAD       | 11 |
| CD24      | 11 |
| CDKN2D    | 11 |
| INVS      | 11 |
| COMP      | 11 |
| NR4A3     | 11 |
| POU2F2    | 11 |
| HTATIP    | 11 |

|          |    |
|----------|----|
| CYCS     | 11 |
| PPP1R13B | 11 |
| PIK3R2   | 11 |
| ISYNA1   | 11 |
| IPS      | 11 |
| HSPD1    | 11 |
| MRXS5    | 11 |
| HLCS     | 11 |
| ST2      | 11 |
| PTK2     | 11 |
| IL8RB    | 11 |
| PDGFB    | 11 |
| MAPK9    | 11 |
| FOSL1    | 11 |
| IGHA1    | 11 |
| CX3CR1   | 11 |
| CCL1     | 11 |
| IL13RA2  | 11 |
| NR3C1    | 11 |
| CASP3    | 10 |
| FUS      | 10 |
| IAPP     | 10 |
| SPEF1    | 10 |
| PDZK1    | 10 |
| SLPI     | 10 |
| PCNA     | 10 |
| MTTP     | 10 |
| NFE2     | 10 |
| UCHL1    | 10 |
| PRDX2    | 10 |
| TAM      | 10 |
| MITF     | 10 |
| PSMA5    | 10 |
| SDS      | 10 |
| AHR      | 10 |
| PROC     | 10 |
| INS      | 10 |
| COL11A2  | 10 |
| STAT4    | 10 |
| CDC42    | 10 |



|          |    |
|----------|----|
| ITGA5    | 10 |
| CDK2     | 10 |
| RERE     | 10 |
| SPG7     | 10 |
| ABL2     | 10 |
| NCOA5    | 10 |
| ASF1A    | 10 |
| MBNL1    | 10 |
| INTU     | 10 |
| C10orf10 | 10 |
| SART3    | 10 |
| CSF1     | 10 |
| NLRP3    | 10 |
| EGR1     | 10 |
| TAR      | 10 |
| TGFB2    | 10 |
| HLA-G    | 10 |
| ZMYM2    | 10 |
| LDLR     | 10 |
| CD207    | 10 |
| PDGFA    | 10 |
| C9orf3   | 10 |
| ALOX5    | 10 |
| CTGF     | 10 |
| CCL18    | 10 |
| SCARB1   | 10 |
| LILRB1   | 10 |
| FCAR     | 10 |
| TREM1    | 10 |
| CCL15    | 10 |
| DDIT3    | 9  |
| KRT7     | 9  |
| SCLY     | 9  |
| ITGB3    | 9  |
| NGF      | 9  |
| MARCKS   | 9  |
| CES2     | 9  |
| PRG2     | 9  |
| MBP      | 9  |
| WT1      | 9  |

|           |   |
|-----------|---|
| ENO2      | 9 |
| MTG1      | 9 |
| COL9A3    | 9 |
| SUB1      | 9 |
| CBL       | 9 |
| TEC       | 9 |
| TOC       | 9 |
| TEC       | 9 |
| PTH       | 9 |
| SBDS      | 9 |
| GDNF      | 9 |
| BHLHB5    | 9 |
| NOS3      | 9 |
| DNAI1     | 9 |
| NRAS      | 9 |
| NT5C2     | 9 |
| DC2       | 9 |
| IFNG      | 9 |
| TNFRSF10A | 9 |
| PAM       | 9 |
| HPSE      | 9 |
| SOD2      | 9 |
| PTEN      | 9 |
| MEFV      | 9 |
| E2F1      | 9 |
| THBS1     | 9 |
| TNFRSF9   | 9 |
| SAGE1     | 9 |
| GAPDH     | 9 |
| GJB6      | 9 |
| PICALM    | 9 |
| CADPS     | 9 |
| CAPS      | 9 |
| SLC3A2    | 9 |
| ARCN1     | 9 |
| COPD      | 9 |
| EIF2AK2   | 9 |
| MAFB      | 9 |
| IL17D     | 9 |
| TYROBP    | 9 |

|         |   |
|---------|---|
| CALCR   | 9 |
| PLA2G2A | 9 |
| ODF1    | 9 |
| CXCL5   | 9 |
| TFPI    | 9 |
| ALDH7A1 | 9 |
| EPD     | 9 |
| TCHH    | 9 |
| CCDC6   | 9 |
| BSG     | 9 |
| SELE    | 9 |
| CD53    | 9 |
| TLR8    | 9 |
| MNDA    | 9 |
| ADAM17  | 9 |
| EML1    | 9 |
| ANC     | 8 |
| NAAA    | 8 |
| MT1E    | 8 |
| AGXT    | 8 |
| PRL     | 8 |
| CIB1    | 8 |
| CYP27A1 | 8 |
| MT1JP   | 8 |
| CDKN2B  | 8 |
| HRAS    | 8 |
| SCN8A   | 8 |
| COL9A2  | 8 |
| COL9A1  | 8 |
| SPNS1   | 8 |
| RAC1    | 8 |
| RPL29   | 8 |
| HHIP    | 8 |
| KLRB1   | 8 |
| CD47    | 8 |
| BRCA1   | 8 |
| PHGDH   | 8 |
| MAF     | 8 |
| PYCARD  | 8 |
| PGD     | 8 |

|           |   |
|-----------|---|
| KIAA1754  | 8 |
| GF11      | 8 |
| RIPK1     | 8 |
| CPM       | 8 |
| CA8       | 8 |
| UTS2R     | 8 |
| CCR4      | 8 |
| SLC14A2   | 8 |
| RALBP1    | 8 |
| CNOT6     | 8 |
| C10orf97  | 8 |
| ANKRD1    | 8 |
| PCBD1     | 8 |
| SMG1      | 8 |
| ENPEP     | 8 |
| TNFRSF10B | 8 |
| CSF2      | 8 |
| ALOX5AP   | 8 |
| CD37      | 8 |
| PSMC6     | 8 |
| PKLR      | 8 |
| SETBP1    | 8 |
| PTCH1     | 8 |
| TPX2      | 8 |
| MYCBP2    | 8 |
| OAS3      | 8 |
| TIRAP     | 8 |
| SND1      | 8 |
| VIPR1     | 8 |
| LTA       | 8 |
| PPA1      | 8 |
| NPY6R     | 8 |
| PPYR1     | 8 |
| PAH       | 8 |
| ICAM3     | 8 |
| TAS2R38   | 8 |
| LTB       | 8 |
| AXL       | 8 |
| CCL13     | 8 |
| SMC2      | 8 |

|          |   |
|----------|---|
| NODAL    | 7 |
| IDDM2    | 7 |
| THY1     | 7 |
| ENG      | 7 |
| ST3GAL4  | 7 |
| ALPP     | 7 |
| AKT1S1   | 7 |
| RUNX2    | 7 |
| MARK1    | 7 |
| ETFA     | 7 |
| CXCL13   | 7 |
| TOP      | 7 |
| THOP1    | 7 |
| NT5E     | 7 |
| ETS1     | 7 |
| PRNP     | 7 |
| MT1B     | 7 |
| NPC1     | 7 |
| MAP3K8   | 7 |
| STS      | 7 |
| TERF1    | 7 |
| SLAMF1   | 7 |
| SCLC1    | 7 |
| LAT      | 7 |
| ORC3L    | 7 |
| HLA-B    | 7 |
| LAT2     | 7 |
| PSMC5    | 7 |
| C2       | 7 |
| SLC25A10 | 7 |
| IL22     | 7 |
| ZBTB8OS  | 7 |
| KRT31    | 7 |
| DES      | 7 |
| SPIB     | 7 |
| IL27     | 7 |
| IL7R     | 7 |
| SMAD2    | 7 |
| SQSTM1   | 7 |
| CDKL1    | 7 |

|          |   |
|----------|---|
| NUP43    | 7 |
| CCRK     | 7 |
| CYSLTR2  | 7 |
| MXD1     | 7 |
| NME1     | 7 |
| RBL2     | 7 |
| IFNAR1   | 7 |
| SARDH    | 7 |
| ICOSLG   | 7 |
| TICAM1   | 7 |
| NR2C2    | 7 |
| CXCL1    | 7 |
| CHI3L1   | 7 |
| CENPJ    | 7 |
| CYP1A1   | 7 |
| PPP2R4   | 7 |
| TRIM69   | 7 |
| MAP3K7   | 7 |
| ABCD1    | 7 |
| CXCL11   | 7 |
| SERPINA1 | 7 |
| EPHB6    | 7 |
| MZF1     | 7 |
| TLR6     | 7 |
| POLD3    | 7 |
| AIFM1    | 7 |
| ATP7B    | 7 |
| CSTB     | 7 |
| NFKBIA   | 7 |
| MAP2K6   | 7 |
| ICAM2    | 7 |
| TPT1     | 7 |
| LITAF    | 7 |
| GFAP     | 6 |
| ESR1     | 6 |
| NOTCH1   | 6 |
| HECA     | 6 |
| HDC      | 6 |
| KITLG    | 6 |
| TSPYL2   | 6 |

|          |   |
|----------|---|
| PIGA     | 6 |
| CFC1     | 6 |
| IKZF1    | 6 |
| PLXNA3   | 6 |
| ERBB2    | 6 |
| AGRP     | 6 |
| EPRS     | 6 |
| HDAC9    | 6 |
| ADHFE1   | 6 |
| PTGDS    | 6 |
| MRPL28   | 6 |
| NXT1     | 6 |
| NTRK1    | 6 |
| SERPINB3 | 6 |
| DDEF2    | 6 |
| FAM126A  | 6 |
| ITK      | 6 |
| HCC      | 6 |
| SMN1     | 6 |
| RBBP8    | 6 |
| CFLAR    | 6 |
| RIMS1    | 6 |
| PTGES3   | 6 |
| PROS1    | 6 |
| HRB      | 6 |
| MFT      | 6 |
| TNMD     | 6 |
| CARD8    | 6 |
| CA5A     | 6 |
| SACS     | 6 |
| CD244    | 6 |
| C8orf4   | 6 |
| SLC22A3  | 6 |
| TMPRSS13 | 6 |
| PSMB5    | 6 |
| KRAS     | 6 |
| CRYGEP1  | 6 |
| CRYGC    | 6 |
| FN1      | 6 |
| CD99     | 6 |

|           |   |
|-----------|---|
| AR        | 6 |
| IRF2      | 6 |
| ARNT      | 6 |
| TSC1      | 6 |
| SMS       | 6 |
| CDA       | 6 |
| BEST1     | 6 |
| MBTPS1    | 6 |
| ITGA6     | 6 |
| ABCC1     | 6 |
| TMEM132D  | 6 |
| LAMP3     | 6 |
| IL1R1     | 6 |
| CSF2RA    | 6 |
| MARCKSL1  | 6 |
| GPR172A   | 6 |
| TMPRSS11D | 6 |
| SCD       | 6 |
| SMAD4     | 6 |
| NR4A1     | 6 |
| PADI4     | 6 |
| DSP       | 6 |
| GPR172B   | 6 |
| CNTNAP1   | 6 |
| YY1       | 6 |
| TSC2      | 6 |
| WDR48     | 6 |
| DHX40     | 6 |
| PCSK7     | 6 |
| BAG3      | 6 |
| CD6       | 6 |
| AK3       | 6 |
| MERTK     | 6 |
| PRKCA     | 6 |
| PSS       | 6 |
| NOLC1     | 6 |
| RAB3GAP1  | 6 |
| PC-3      | 6 |
| IVNS1ABP  | 6 |
| ABCG1     | 6 |



|          |   |
|----------|---|
| SMAD7    | 6 |
| ADM      | 6 |
| AMPD1    | 6 |
| CLIP1    | 6 |
| ARHGEF5  | 6 |
| MAP2K4   | 6 |
| IL31RA   | 6 |
| DLEU1    | 6 |
| MARK2    | 6 |
| MMP2     | 6 |
| HRX      | 6 |
| UMOD     | 6 |
| DUSP1    | 6 |
| TFDP1    | 6 |
| CCL23    | 6 |
| DDX5     | 6 |
| CXCL2    | 6 |
| NCF2     | 6 |
| TNFRSF14 | 6 |
| PDE4A    | 6 |
| PARVA    | 6 |
| CHUK     | 6 |
| NAMPT    | 6 |
| CCR8     | 6 |
| CD93     | 6 |
| CD82     | 6 |
| ENO3     | 6 |
| EZR      | 6 |
| NOD1     | 6 |
| SCYE1    | 6 |
| F10      | 6 |
| MLLT10   | 6 |
| CEBPD    | 6 |
| VAV1     | 5 |
| ZAP70    | 5 |
| PAX5     | 5 |
| OPN1SW   | 5 |
| CCL27    | 5 |
| ERAL1    | 5 |
| PDLIM3   | 5 |

|          |   |
|----------|---|
| ATRNL1   | 5 |
| MYOD1    | 5 |
| NAT10    | 5 |
| ASRGL1   | 5 |
| ATHS     | 5 |
| TBC1D9   | 5 |
| PF4      | 5 |
| KIR3DL1  | 5 |
| PPP1R13L | 5 |
| SHC3     | 5 |
| RNH1     | 5 |
| GEM      | 5 |
| BANK1    | 5 |
| ANTXR2   | 5 |
| RUNX1T1  | 5 |
| MT1A     | 5 |
| HLA-DRB1 | 5 |
| RAPH1    | 5 |
| MT1L     | 5 |
| PGPEP1   | 5 |
| APEX1    | 5 |
| HOXB4    | 5 |
| LCP2     | 5 |
| PDAP1    | 5 |
| ACPP     | 5 |
| TUSC2    | 5 |
| DDEF1    | 5 |
| C4BPA    | 5 |
| MRPS30   | 5 |
| PAPOLA   | 5 |
| METAP2   | 5 |
| USO1     | 5 |
| CTNND1   | 5 |
| PTHLH    | 5 |
| TYR      | 5 |
| HM13     | 5 |
| C21orf63 | 5 |
| MSMB     | 5 |
| OSM      | 5 |
| PRKG1    | 5 |

|          |   |
|----------|---|
| PRKAR1A  | 5 |
| SULT1E1  | 5 |
| LMLN     | 5 |
| F8       | 5 |
| MST1     | 5 |
| PLAG1    | 5 |
| NPEPPS   | 5 |
| PI3      | 5 |
| NGFR     | 5 |
| PSAT1    | 5 |
| BAK1     | 5 |
| SLC17A5  | 5 |
| SILV     | 5 |
| MAGT1    | 5 |
| ALPI     | 5 |
| RPAIN    | 5 |
| CDC2     | 5 |
| SCFV     | 5 |
| MGC29506 | 5 |
| FGFR1    | 5 |
| ADCYAP1  | 5 |
| PLXNA2   | 5 |
| PHYH     | 5 |
| MAFK     | 5 |
| ICOS     | 5 |
| GTF3A    | 5 |
| MOS      | 5 |
| DNAH5    | 5 |
| CILD2    | 5 |
| MCAM     | 5 |
| NANOS2   | 5 |
| HPRT1    | 5 |
| NF1      | 5 |
| DAG1     | 5 |
| CD3EAP   | 5 |
| CA2      | 5 |
| ERC2     | 5 |
| CAST     | 5 |
| HHEX     | 5 |
| FZD4     | 5 |

|           |   |
|-----------|---|
| TNFRSF18  | 5 |
| LPAR3     | 5 |
| TIE1      | 5 |
| EFNA2     | 5 |
| TBP       | 5 |
| LOC441931 | 5 |
| MRGPRX1   | 5 |
| OXER1     | 5 |
| GPR151    | 5 |
| GPRC6A    | 5 |
| MRGPRX3   | 5 |
| MRGPRX4   | 5 |
| LGR6      | 5 |
| GPBAR1    | 5 |
| GPR166P   | 5 |
| KHDRBS1   | 5 |
| CYP19A1   | 5 |
| MKL1      | 5 |
| FGF1      | 5 |
| HAMP      | 5 |
| CSK       | 5 |
| ENTPD1    | 5 |
| PLA2G6    | 5 |
| MSX2      | 5 |
| LPA       | 5 |
| MAL       | 5 |
| C1QBP     | 5 |
| LCT       | 5 |
| PPIG      | 5 |
| MAG       | 5 |
| JTB       | 5 |
| PLA2G1B   | 5 |
| LAP3      | 5 |
| NFKB1     | 5 |
| LAP       | 5 |
| PDLA      | 5 |
| YES1      | 5 |
| CLIP2     | 5 |
| EPHA1     | 5 |
| IKBKG     | 5 |

|          |   |
|----------|---|
| RSS      | 5 |
| PSMB9    | 5 |
| MX1      | 5 |
| NME2     | 5 |
| WNK1     | 5 |
| PITX3    | 5 |
| SFTPA1   | 5 |
| CEACAM8  | 5 |
| AMDP1    | 5 |
| AMD1     | 5 |
| PMAIP1   | 5 |
| SLC25A21 | 5 |
| TAOK2    | 5 |
| ODC1     | 5 |
| WIPF2    | 5 |
| C12orf57 | 5 |
| MIA      | 5 |
| CXCL6    | 5 |
| CD97     | 5 |
| LAIR1    | 5 |
| PTX3     | 5 |
| COX2     | 5 |
| CXCL16   | 5 |
| MAPK11   | 5 |
| VIT      | 5 |
| ZSCAN1   | 5 |
| PSMB8    | 5 |
| MRC1     | 5 |
| CYSLTR1  | 5 |
| GJA8     | 5 |
| TJP1     | 5 |
| SLC45A2  | 5 |
| BCKDHA   | 5 |
| ISG15    | 5 |
| IFNA2    | 5 |
| IFNA17   | 5 |
| IFN1     | 5 |
| PAQR7    | 5 |
| IL29     | 5 |
| MAPK13   | 5 |

|         |   |
|---------|---|
| AGTR2   | 5 |
| MYST4   | 5 |
| NDC80   | 5 |
| SS18L1  | 4 |
| CD79A   | 4 |
| CDR3    | 4 |
| ABCC8   | 4 |
| MKKS    | 4 |
| MKS1    | 4 |
| ABO     | 4 |
| GATA1   | 4 |
| EGFR    | 4 |
| KCNK3   | 4 |
| BDNF    | 4 |
| HTC2    | 4 |
| DMD     | 4 |
| RAG1    | 4 |
| HES1    | 4 |
| MT1IP   | 4 |
| FRAP1   | 4 |
| MT1G    | 4 |
| MTNR1A  | 4 |
| MT1M    | 4 |
| MT1F    | 4 |
| MT1H    | 4 |
| MT1X    | 4 |
| CSR3P3  | 4 |
| GYPA    | 4 |
| CEACAM5 | 4 |
| ITFG1   | 4 |
| METTL8  | 4 |
| TIPRL   | 4 |
| MYCN    | 4 |
| GP1BA   | 4 |
| CXCR5   | 4 |
| PTPRU   | 4 |
| NXF1    | 4 |
| SRY     | 4 |
| POLD4   | 4 |
| POLE4   | 4 |

|         |   |
|---------|---|
| XIAP    | 4 |
| NPPA    | 4 |
| IGFALS  | 4 |
| CNTN3   | 4 |
| SELP    | 4 |
| KCNE1   | 4 |
| PCS     | 4 |
| CASR    | 4 |
| UBL4A   | 4 |
| G6PD    | 4 |
| MINK1   | 4 |
| S100A12 | 4 |
| HOXA9   | 4 |
| FGF13   | 4 |
| KLRD1   | 4 |
| FGF2    | 4 |
| TRIM13  | 4 |
| GTF2I   | 4 |
| SIRPA   | 4 |
| CXADR   | 4 |
| NR1I3   | 4 |
| CXADRP1 | 4 |
| A1CF    | 4 |
| CD74    | 4 |
| MOCOS   | 4 |
| ASPA    | 4 |
| ASPM    | 4 |
| NFATC2  | 4 |
| CGA     | 4 |
| C3      | 4 |
| ATG5    | 4 |
| RPS6KA3 | 4 |
| ROPN1L  | 4 |
| ASIP    | 4 |
| ACVRL1  | 4 |
| NR0B2   | 4 |
| PNMA2   | 4 |
| SAG     | 4 |
| HMHA1   | 4 |
| RNASE3  | 4 |

|           |   |
|-----------|---|
| NCKIPSD   | 4 |
| PRKAA1    | 4 |
| PRKAB1    | 4 |
| UBE2I     | 4 |
| RNF7      | 4 |
| DDX4      | 4 |
| PRKAA2    | 4 |
| AD5       | 4 |
| S100A6    | 4 |
| CEBPA     | 4 |
| LYST      | 4 |
| FOXO1     | 4 |
| SLC12A9   | 4 |
| MSH3      | 4 |
| POLD1     | 4 |
| FGF4      | 4 |
| PMP22     | 4 |
| BCS1L     | 4 |
| CGB5      | 4 |
| TNFRSF13C | 4 |
| CNR2      | 4 |
| PITX2     | 4 |
| CD274     | 4 |
| HSPA5     | 4 |
| GRDX      | 4 |
| IGF2BP2   | 4 |
| MAP3K1    | 4 |
| DMN       | 4 |
| TPM3      | 4 |
| ACD       | 4 |
| AAAS      | 4 |
| TXNRD1    | 4 |
| HHAT      | 4 |
| MST1R     | 4 |
| CTAG1B    | 4 |
| UCN3      | 4 |
| STIP1     | 4 |
| NUP62     | 4 |
| MYBL2     | 4 |
| DR1       | 4 |



|         |   |
|---------|---|
| GPR177  | 4 |
| ACCS    | 4 |
| ATF2    | 4 |
| DNPEP   | 4 |
| DAP     | 4 |
| GMPS    | 4 |
| SOCS2   | 4 |
| FBXL20  | 4 |
| HOXA10  | 4 |
| SEMA4D  | 4 |
| ACSS2   | 4 |
| LYPLA3  | 4 |
| IRF7    | 4 |
| SMARCA2 | 4 |
| FLNA    | 4 |
| PR      | 4 |
| F11R    | 4 |
| CD84    | 4 |
| MED1    | 4 |
| NLRP2   | 4 |
| TRADD   | 4 |
| NCAPG2  | 4 |
| EXOSC3  | 4 |
| PVRL1   | 4 |
| SST     | 4 |
| TIPARP  | 4 |
| CIC     | 4 |
| CCL16   | 4 |
| SIT1    | 4 |
| P2RX7   | 4 |
| CEACAM6 | 4 |
| PRKCB1  | 4 |
| MLXIPL  | 4 |
| TRAF1   | 4 |
| PRDX6   | 4 |
| CTNNBL1 | 4 |
| NPS     | 4 |
| CDK5    | 4 |
| MMP14   | 4 |
| LEPR    | 4 |

|           |   |
|-----------|---|
| IL10RA    | 4 |
| KLF2      | 4 |
| M195      | 4 |
| HSPA8     | 4 |
| GRHL3     | 4 |
| SAFB      | 4 |
| LILRB4    | 4 |
| TNFSF12   | 4 |
| TXNRD3    | 4 |
| CD180     | 4 |
| STX1A     | 4 |
| CCRL1     | 4 |
| ELF3      | 4 |
| MAP2K7    | 4 |
| TSPAN31   | 4 |
| MTRR      | 4 |
| NANS      | 4 |
| HOXB6     | 4 |
| CEACAM4   | 4 |
| MN1       | 4 |
| PTGES     | 4 |
| FGF9      | 4 |
| IGKV2D-29 | 4 |
| MGCR      | 4 |
| DHS       | 4 |
| ENAH      | 4 |
| PLA2G10   | 4 |
| EMR2      | 4 |
| APOB      | 4 |
| LTB4R     | 4 |
| ITLN1     | 4 |
| ABCC11    | 4 |
| LILRB2    | 4 |
| ACAA1     | 4 |
| CXCL14    | 4 |
| CSE       | 4 |
| OSCAR     | 4 |
| MAPK12    | 4 |
| IER3      | 4 |
| P2RY2     | 4 |

|          |   |
|----------|---|
| PTN      | 4 |
| PROCR    | 4 |
| IRAK2    | 4 |
| NRTN     | 4 |
| ALX4     | 4 |
| TRO      | 4 |
| C1S      | 4 |
| F3       | 4 |
| LILRA5   | 4 |
| IRAK3    | 4 |
| FPR2     | 4 |
| CLEC4D   | 3 |
| FH       | 3 |
| EFS      | 3 |
| EAF2     | 3 |
| PDLIM7   | 3 |
| RRBP1    | 3 |
| EXTL3    | 3 |
| ADAMTS13 | 3 |
| PTS      | 3 |
| SCN2A    | 3 |
| FXD5     | 3 |
| ZFP36    | 3 |
| KRT124P  | 3 |
| SRI      | 3 |
| BCL2L11  | 3 |
| SH3BP4   | 3 |
| AAVS1    | 3 |
| BMP4     | 3 |
| EVI1     | 3 |
| FGFR3    | 3 |
| YWHAQ    | 3 |
| CEACAM3  | 3 |
| GAL      | 3 |
| CEACAM7  | 3 |
| PSG2     | 3 |
| MYOG     | 3 |
| CLOCK    | 3 |
| C21orf33 | 3 |
| ATXN1    | 3 |

|          |   |
|----------|---|
| PDGFRB   | 3 |
| TWIST1   | 3 |
| FLT4     | 3 |
| RPS19    | 3 |
| PRB1     | 3 |
| TNFRSF4  | 3 |
| YARS     | 3 |
| ACHE     | 3 |
| TNFAIP1  | 3 |
| BID      | 3 |
| RBM45    | 3 |
| NDUFB3   | 3 |
| MALT1    | 3 |
| GABRQ    | 3 |
| POLE     | 3 |
| ID2      | 3 |
| HSP90AA1 | 3 |
| MAPT     | 3 |
| BCAR1    | 3 |
| CSE1L    | 3 |
| CPA1     | 3 |
| IL17C    | 3 |
| IL21     | 3 |
| DLL1     | 3 |
| CALCA    | 3 |
| EEF1A2   | 3 |
| BMP1     | 3 |
| FES      | 3 |
| MPZ      | 3 |
| TBX5     | 3 |
| DLD      | 3 |
| TNFRSF17 | 3 |
| DNAJC5   | 3 |
| IL2RB    | 3 |
| CD70     | 3 |
| MLYCD    | 3 |
| MCKD1    | 3 |
| TNIP1    | 3 |
| SLC19A2  | 3 |
| NPM1     | 3 |

|               |   |
|---------------|---|
| TCN1          | 3 |
| GIF           | 3 |
| CDK2AP2       | 3 |
| SF3B14        | 3 |
| RP11-336K24.9 | 3 |
| RPP14         | 3 |
| NBN           | 3 |
| AMBP          | 3 |
| ALLC          | 3 |
| PRCP          | 3 |
| CDKN2C        | 3 |
| CRK           | 3 |
| EEF1E1        | 3 |
| TPPP2         | 3 |
| C2orf28       | 3 |
| ZNF197        | 3 |
| SPIN1         | 3 |
| NDUFAB1       | 3 |
| TYRO3         | 3 |
| ODZ1          | 3 |
| NR0B1         | 3 |
| SLC11A1       | 3 |
| PDIA3         | 3 |
| CPAT1         | 3 |
| RAB35         | 3 |
| LATS1         | 3 |
| FADD          | 3 |
| RIPK2         | 3 |
| RIEG2         | 3 |
| COLEC2        | 3 |
| NOTCH4        | 3 |
| SLC16A1       | 3 |
| GAB2          | 3 |
| IRF3          | 3 |
| SH3YL1        | 3 |
| SLC26A3       | 3 |
| DDR1          | 3 |
| PTBP1         | 3 |
| PTBP2         | 3 |
| MCAT          | 3 |

|         |   |
|---------|---|
| GNRH1   | 3 |
| MAS1    | 3 |
| EIF2C2  | 3 |
| CCBP2   | 3 |
| MCPH1   | 3 |
| RPS6KB1 | 3 |
| NOTCH3  | 3 |
| FOXC1   | 3 |
| AKR1B1  | 3 |
| CPE     | 3 |
| SNRPE   | 3 |
| ABCC6   | 3 |
| AVP     | 3 |
| PBX1    | 3 |
| USF2    | 3 |
| PVR     | 3 |
| PC      | 3 |
| NOL1    | 3 |
| SCN5A   | 3 |
| GYPE    | 3 |
| NSUN5   | 3 |
| CCDC62  | 3 |
| EDNRA   | 3 |
| ESR2    | 3 |
| BRD8    | 3 |
| RAPGEF5 | 3 |
| TYRP1   | 3 |
| ARPP-21 | 3 |
| TAS1R1  | 3 |
| SGPL1   | 3 |
| PLXNB1  | 3 |
| CAMK2G  | 3 |
| HSF1    | 3 |
| HSPB1   | 3 |
| SEPP1   | 3 |
| POU2F1  | 3 |
| GLI3    | 3 |
| BMX     | 3 |
| MDM4    | 3 |
| IFI44   | 3 |

|          |   |
|----------|---|
| MMEL1    | 3 |
| HINT1    | 3 |
| VHL      | 3 |
| PEBP1    | 3 |
| ETS2     | 3 |
| ACR      | 3 |
| PTGER2   | 3 |
| NR1H4    | 3 |
| MMD      | 3 |
| SPAG11B  | 3 |
| PSMD10   | 3 |
| GSTO1    | 3 |
| GOSR1    | 3 |
| BBS9     | 3 |
| DNALI1   | 3 |
| GHR      | 3 |
| CEACAM1  | 3 |
| POU1F1   | 3 |
| GYPB     | 3 |
| GRB10    | 3 |
| DIAPH2   | 3 |
| CLTC     | 3 |
| HERPUD1  | 3 |
| NCOR1    | 3 |
| CCL3L1   | 3 |
| INHBA    | 3 |
| TRAM1    | 3 |
| HSPB2    | 3 |
| ZAK      | 3 |
| C4A      | 3 |
| CCHCR1   | 3 |
| FBXL15   | 3 |
| PDLIM4   | 3 |
| C4B      | 3 |
| CXCR6    | 3 |
| SERPINA2 | 3 |
| SARS2    | 3 |
| SARS     | 3 |
| OPN1MW   | 3 |
| AIF1     | 3 |

|                |   |
|----------------|---|
| SMOX           | 3 |
| CTSA           | 3 |
| MAD1L1         | 3 |
| GLA            | 3 |
| TSPAN4         | 3 |
| CCL3L3         | 3 |
| ANGPT1         | 3 |
| FIGF           | 3 |
| ATIC           | 3 |
| KIR3DL2        | 3 |
| KCNMA1         | 3 |
| CLCF1          | 3 |
| ETV4           | 3 |
| CLC            | 3 |
| ACAT1          | 3 |
| LY9            | 3 |
| CTF1           | 3 |
| MAT1A          | 3 |
| PELP1          | 3 |
| CD226          | 3 |
| NAT8           | 3 |
| PIGU           | 3 |
| CRISP2         | 3 |
| GAB1           | 3 |
| DADB-112B14.11 | 3 |
| MYBBP1A        | 3 |
| PPARG          | 3 |
| TGFBI          | 3 |
| NFYA           | 3 |
| PTGDR          | 3 |
| TNFSF18        | 3 |
| DPYD           | 3 |
| TEP1           | 3 |
| HOXB8          | 3 |
| REEP5          | 3 |
| FBXW11         | 3 |
| MLLT3          | 3 |
| PTGS1          | 3 |
| TBPL1          | 3 |
| SLC25A4        | 3 |



|         |   |
|---------|---|
| CRX     | 3 |
| PTGER1  | 3 |
| TM7SF2  | 3 |
| UQCRFS1 | 3 |
| FEV     | 3 |
| CD8B    | 3 |
| RPGR    | 3 |
| RGS18   | 3 |
| TRAF5   | 3 |
| SCGN    | 3 |
| ACTN4   | 3 |
| CRABP1  | 3 |
| TICAM2  | 3 |
| IL6R    | 3 |
| BGLAP   | 3 |
| RGS2    | 3 |
| BMPR2   | 3 |
| HLA-DRA | 3 |
| CD151   | 3 |
| PEG10   | 3 |
| MGP     | 3 |
| TUFM    | 3 |
| CTBP1   | 3 |
| RNGTT   | 3 |
| PFDN5   | 3 |
| EMR1    | 3 |
| RORC    | 3 |
| TFAP4   | 3 |
| IL17B   | 3 |
| TNFSF15 | 3 |
| IL24    | 3 |
| NBPF1   | 3 |
| GHRH    | 3 |
| TNIK    | 3 |
| TFPI2   | 3 |
| CXCR7   | 3 |
| RARB    | 3 |
| IL10RB  | 3 |
| LY86    | 3 |
| PTPN12  | 3 |

|           |   |
|-----------|---|
| ADAM8     | 3 |
| NOX4      | 3 |
| SIGLEC5   | 3 |
| TNFSF14   | 3 |
| TES       | 3 |
| IL20      | 3 |
| RTN3      | 3 |
| MEF2D     | 3 |
| TPPP3     | 3 |
| CAMKV     | 3 |
| SNAP91    | 3 |
| HELT      | 3 |
| PPARA     | 3 |
| PALM      | 3 |
| CYP24A1   | 3 |
| CENPK     | 3 |
| NCOA2     | 3 |
| TNFAIP2   | 3 |
| PAOX      | 3 |
| SPHK1     | 3 |
| HLN2      | 3 |
| VSIG4     | 3 |
| MAP3K7IP2 | 3 |
| AOC3      | 3 |
| IL20RA    | 3 |
| USP18     | 3 |
| ADAMTS4   | 3 |
| UBR4      | 3 |
| TSN       | 3 |
| SNORD50A  | 3 |
| SNORD50B  | 3 |
| ICEBERG   | 3 |
| TNIP3     | 3 |
| ZC3H12A   | 3 |
| NKX2-5    | 2 |
| RAG2      | 2 |
| SDC1      | 2 |
| EPOR      | 2 |
| CHM       | 2 |
| NR2E3     | 2 |

|           |   |
|-----------|---|
| KLRK1     | 2 |
| ALCAM     | 2 |
| PTPRN     | 2 |
| CDR1      | 2 |
| NAT13     | 2 |
| RAB8A     | 2 |
| NANOGP8   | 2 |
| NANOG     | 2 |
| PGC       | 2 |
| PSMA7     | 2 |
| RIT2      | 2 |
| CD79B     | 2 |
| AKR1C4    | 2 |
| CDK4      | 2 |
| IRF4      | 2 |
| ELSPBP1   | 2 |
| CD160     | 2 |
| TCF7L2    | 2 |
| LOH19CR1  | 2 |
| PPY       | 2 |
| NP        | 2 |
| MLN       | 2 |
| RAP1A     | 2 |
| MAP2      | 2 |
| PKD2L1    | 2 |
| RBPJ      | 2 |
| TERF2IP   | 2 |
| COTL1     | 2 |
| HLA-C     | 2 |
| CALML3    | 2 |
| PTPN22    | 2 |
| PLN       | 2 |
| LGALS4    | 2 |
| SRF       | 2 |
| BMP2      | 2 |
| SMAD5OS   | 2 |
| SLC2A1    | 2 |
| LOC730415 | 2 |
| PGP       | 2 |
| CD72      | 2 |

|          |   |
|----------|---|
| BTG3     | 2 |
| ZMYND10  | 2 |
| RB1      | 2 |
| RAC2     | 2 |
| IGL      | 2 |
| BRCA2    | 2 |
| NOTCH2   | 2 |
| TSPO     | 2 |
| GATA2    | 2 |
| DDC      | 2 |
| MEF2C    | 2 |
| MCL1     | 2 |
| ID1      | 2 |
| PIM1     | 2 |
| MT2A     | 2 |
| MTNR1B   | 2 |
| COPE     | 2 |
| FOXO3    | 2 |
| KLRC1    | 2 |
| IL32     | 2 |
| KIAA1279 | 2 |
| ITGAE    | 2 |
| MEIS1    | 2 |
| MSLN     | 2 |
| UCP2     | 2 |
| PRDM1    | 2 |
| TCF7     | 2 |
| ITGAV    | 2 |
| DHDDS    | 2 |
| TRNA     | 2 |
| RAB27A   | 2 |
| IL2RG    | 2 |
| TRD      | 2 |
| NPY      | 2 |
| CMPK1    | 2 |
| SMPD1    | 2 |
| MTA2     | 2 |
| PMCH     | 2 |
| CSHL1    | 2 |
| MICA     | 2 |

|                   |   |
|-------------------|---|
| XXbac-BPG181B23.1 | 2 |
| WNT5A             | 2 |
| PIP               | 2 |
| PCAF              | 2 |
| MOG               | 2 |
| NCR1              | 2 |
| SDHD              | 2 |
| ANKHD1            | 2 |
| PTPRA             | 2 |
| IPLL2             | 2 |
| BPNT1             | 2 |
| DUSP2             | 2 |
| RP6-213H19.1      | 2 |
| DSG1              | 2 |
| HMI               | 2 |
| MIA3              | 2 |
| DEFA1             | 2 |
| CTSL1             | 2 |
| TSLP              | 2 |
| STIL              | 2 |
| TGFB3             | 2 |
| DGCR2             | 2 |
| CCNH              | 2 |
| NCR3              | 2 |
| NTRK2             | 2 |
| TFCP2             | 2 |
| HNRNPC            | 2 |
| SFRS1             | 2 |
| TSC22D3           | 2 |
| PAEP              | 2 |
| CFH               | 2 |
| ID3               | 2 |
| IDS               | 2 |
| COL4A5            | 2 |
| SLC2A10           | 2 |
| PRTN3             | 2 |
| ACTA1             | 2 |
| PPT1              | 2 |
| ANXA2             | 2 |
| EIF2AK3           | 2 |

|           |   |
|-----------|---|
| CD164     | 2 |
| IPLL3     | 2 |
| IBSP      | 2 |
| IPLL3     | 2 |
| TXN       | 2 |
| BLK       | 2 |
| SERPINA5  | 2 |
| MROS      | 2 |
| PPOX      | 2 |
| MRAP      | 2 |
| MAG       | 2 |
| CAA       | 2 |
| CTBS      | 2 |
| SLC7A5    | 2 |
| FOXP1     | 2 |
| PCYT1B    | 2 |
| HSP90B1   | 2 |
| COL14A1   | 2 |
| LY6E      | 2 |
| LCH       | 2 |
| CADM1     | 2 |
| TACR1     | 2 |
| MYH9      | 2 |
| KLF4      | 2 |
| COP1      | 2 |
| MUC2      | 2 |
| SLC20A1   | 2 |
| ARNTL     | 2 |
| RAI1      | 2 |
| GEN1      | 2 |
| SMCR      | 2 |
| CYGB      | 2 |
| TNFSF8    | 2 |
| PSMD4     | 2 |
| LSP1      | 2 |
| LOC390387 | 2 |
| SNORA73A  | 2 |
| MVP       | 2 |
| BCKDHB    | 2 |
| UBXD5     | 2 |

|          |   |
|----------|---|
| PKD1     | 2 |
| SIGLEC12 | 2 |
| IL12B    | 2 |
| SLC22A1  | 2 |
| KRT122P  | 2 |
| ITGA1    | 2 |
| TESC     | 2 |
| COL1A1   | 2 |
| SCN10A   | 2 |
| SLC12A3  | 2 |
| BANF1    | 2 |
| PTGER3   | 2 |
| RAPGEF3  | 2 |
| DDX53    | 2 |
| LIAS     | 2 |
| F2R      | 2 |
| SDC2     | 2 |
| ZC3H12D  | 2 |
| PLAA     | 2 |
| MMP12    | 2 |
| HOXB3    | 2 |
| CEP70    | 2 |
| FHIT     | 2 |
| PON1     | 2 |
| FGD1     | 2 |
| SGCG     | 2 |
| CDIPT    | 2 |
| VDAC1    | 2 |
| POLE3    | 2 |
| RNPC3    | 2 |
| LGALS1   | 2 |
| DOCK3    | 2 |
| KIR2DL2  | 2 |
| MTMR11   | 2 |
| TIMELESS | 2 |
| RDH11    | 2 |
| CYP1B1   | 2 |
| ETV5     | 2 |
| TRERF1   | 2 |
| NFKB2    | 2 |

|          |   |
|----------|---|
| ADRB2    | 2 |
| ARSF     | 2 |
| APOBEC3G | 2 |
| 8-Mar    | 2 |
| EGR2     | 2 |
| LYVE1    | 2 |
| BCL2A1   | 2 |
| EPHA4    | 2 |
| FKBP1A   | 2 |
| CLU      | 2 |
| GAS6     | 2 |
| SERPINF2 | 2 |
| BEAN     | 2 |
| PIAS1    | 2 |
| PRSS33   | 2 |
| SPARC    | 2 |
| TAAR1    | 2 |
| FKBP5    | 2 |
| TRAF3    | 2 |
| GSTM1    | 2 |
| RPS6KA1  | 2 |
| RAD51    | 2 |
| IKZF4    | 2 |
| BUD31    | 2 |
| EOS      | 2 |
| HOXB2    | 2 |
| HOXB7    | 2 |
| TRIM37   | 2 |
| EDAR     | 2 |
| IGKV2-23 | 2 |
| FBN2     | 2 |
| EPHB4    | 2 |
| VIPR2    | 2 |
| DDX58    | 2 |
| PRKCZ    | 2 |
| DTL      | 2 |
| FAM20C   | 2 |
| MT3      | 2 |
| TNFRSF6B | 2 |
| AKAP13   | 2 |



|               |   |
|---------------|---|
| PMPS          | 2 |
| BNIP3         | 2 |
| DKFZP586H2123 | 2 |
| BCAP31        | 2 |
| BFAR          | 2 |
| NHS           | 2 |
| HLA-E         | 2 |
| PTPRJ         | 2 |
| PDB1          | 2 |
| C1R           | 2 |
| MYBL1         | 2 |
| GYPC          | 2 |
| ENPP1         | 2 |
| AFF2          | 2 |
| CGN           | 2 |
| NF2           | 2 |
| CCL11         | 2 |
| TRIP10        | 2 |
| NPPC          | 2 |
| IFNGR1        | 2 |
| FBLIM1        | 2 |
| XCL1          | 2 |
| ST6GAL1       | 2 |
| ALDH3A2       | 2 |
| IL25          | 2 |
| MRS2          | 2 |
| NFIC          | 2 |
| CNP           | 2 |
| HPT           | 2 |
| HSR           | 2 |
| COL17A1       | 2 |
| LIPA          | 2 |
| HADHA         | 2 |
| PRODH         | 2 |
| SRA1          | 2 |
| APBB3         | 2 |
| OPRM1         | 2 |
| MAP2K3        | 2 |
| SFTPC         | 2 |
| ADC           | 2 |

|          |   |
|----------|---|
| PTCRA    | 2 |
| TMEM132A | 2 |
| AZU1     | 2 |
| PPL      | 2 |
| FLOT2    | 2 |
| CCR10    | 2 |
| SFRS2    | 2 |
| GCG      | 2 |
| NCL      | 2 |
| XPO1     | 2 |
| IGKV3-7  | 2 |
| F12      | 2 |
| ZBTB12   | 2 |
| CALD1    | 2 |
| RNASE2   | 2 |
| PRLH     | 2 |
| PDPK1    | 2 |
| ABHD5    | 2 |
| MT4      | 2 |
| SIRT1    | 2 |
| CDS1     | 2 |
| MIRN223  | 2 |
| FLG      | 2 |
| NES      | 2 |
| ENO1     | 2 |
| DCD      | 2 |
| CD300C   | 2 |
| ELAVL1   | 2 |
| DNMT3A   | 2 |
| SFTPB    | 2 |
| TGM2     | 2 |
| TXNRD2   | 2 |
| MDS1     | 2 |
| SLC22A16 | 2 |
| MAP3K5   | 2 |
| TREM2    | 2 |
| FABP4    | 2 |
| PDPN     | 2 |
| SERPINF1 | 2 |
| PDK1     | 2 |

|         |   |
|---------|---|
| HSPE1   | 2 |
| PHEX    | 2 |
| RCP9    | 2 |
| HSD11B2 | 2 |
| CTCF    | 2 |
| CLEC4A  | 2 |
| MMVP1   | 2 |
| PPR     | 2 |
| EPHA2   | 2 |
| YME1L1  | 2 |
| CENTG1  | 2 |
| DICER1  | 2 |
| PIF1    | 2 |
| LSS     | 2 |
| ANK1    | 2 |
| PTPRO   | 2 |
| MLLT4   | 2 |
| DOCK2   | 2 |
| GPNMB   | 2 |
| TBCE    | 2 |
| PARC    | 2 |
| LGALS3  | 2 |
| NR1H2   | 2 |
| DEFB4   | 2 |
| MEF2A   | 2 |
| TRNAD1  | 2 |
| ANKH    | 2 |
| MAP3K11 | 2 |
| DLEU2   | 2 |
| CES1    | 2 |
| CCL14   | 2 |
| DCTN1   | 2 |
| GOLGB1  | 2 |
| MXD3    | 2 |
| TPD52   | 2 |
| ARHGAP4 | 2 |
| NRK     | 2 |
| ADIPOR2 | 2 |
| CBFA2T2 | 2 |
| BPI     | 2 |

|           |   |
|-----------|---|
| CES3      | 2 |
| FOLR1     | 2 |
| FUBP1     | 2 |
| MMP10     | 2 |
| KRT81     | 2 |
| CIP29     | 2 |
| IL26      | 2 |
| HOXB1     | 2 |
| HOXB5     | 2 |
| HOXB9     | 2 |
| ERCC2     | 2 |
| BRD1      | 2 |
| PLSCR1    | 2 |
| DPYS      | 2 |
| RAB14     | 2 |
| FBP1      | 2 |
| NDP       | 2 |
| EBAG9     | 2 |
| DOCK1     | 2 |
| HMHB1     | 2 |
| P2RY1     | 2 |
| TRAF4     | 2 |
| HMGA1     | 2 |
| ITM2B     | 2 |
| ECB2      | 2 |
| CTSK      | 2 |
| RBP3      | 2 |
| TERF2     | 2 |
| ERCC3     | 2 |
| IGKV1-13  | 2 |
| SIGLEC1   | 2 |
| TAF9      | 2 |
| FGL2      | 2 |
| SOAT1     | 2 |
| RGS1      | 2 |
| HRH4      | 2 |
| GTPBP1    | 2 |
| MAP3K7IP1 | 2 |
| PVRL2     | 2 |
| IGKV1D-13 | 2 |

|           |   |
|-----------|---|
| IFIT2     | 2 |
| RGS16     | 2 |
| PRX       | 2 |
| C2orf3    | 2 |
| COLQ      | 2 |
| TFEC      | 2 |
| TOX       | 2 |
| PRKX      | 2 |
| ILF3      | 2 |
| GTF2H3    | 2 |
| NRGN      | 2 |
| STT3A     | 2 |
| MAT2B     | 2 |
| LDHA      | 2 |
| LTB4R2    | 2 |
| CD276     | 2 |
| ST8SIA2   | 2 |
| MTDH      | 2 |
| STN       | 2 |
| SNORD3B-1 | 2 |
| SNORD3    | 2 |
| TAS1R2    | 2 |
| SGMS1     | 2 |
| TACR2     | 2 |
| KRT82     | 2 |
| NR2C1     | 2 |
| PCDH8     | 2 |
| C18orf10  | 2 |
| EMR3      | 2 |
| TFPT      | 2 |
| AURKA     | 2 |
| GTF2H2    | 2 |
| GPER      | 2 |
| DBI       | 2 |
| IFI30     | 2 |
| GTF2H1    | 2 |
| GTF2H4    | 2 |
| TADA2L    | 2 |
| IFNAR2    | 2 |
| ACVR2B    | 2 |

|           |   |
|-----------|---|
| MYL4      | 2 |
| LOXL1     | 2 |
| PGK1      | 2 |
| CLEC4M    | 2 |
| HLA-DRB4  | 2 |
| DDOST     | 2 |
| NMB       | 2 |
| KRT13     | 2 |
| DDX39     | 2 |
| LRRC25    | 2 |
| SLC7A9    | 2 |
| LILRA4    | 2 |
| PIGF      | 2 |
| CBLB      | 2 |
| PDE4D     | 2 |
| SERPINB1  | 2 |
| BAT1      | 2 |
| CLEC5A    | 2 |
| GPC3      | 2 |
| APOC3     | 2 |
| IL20RB    | 2 |
| TNFRSF12A | 2 |
| NFKBIL1   | 2 |
| MGCT      | 2 |
| PTAFR     | 2 |
| SIGIRR    | 2 |
| TIAF1     | 2 |
| TK1       | 2 |
| OSBPL1A   | 2 |
| NAIP      | 2 |
| IL22RA2   | 2 |
| ACE2      | 2 |
| CARM1     | 2 |
| MLLT11    | 2 |
| ADAM15    | 2 |
| GTF2H5    | 2 |
| OTC       | 2 |
| ZNF175    | 2 |
| USP3      | 2 |
| USP1      | 2 |

|                 |   |
|-----------------|---|
| JDP2            | 2 |
| IFIT3           | 2 |
| MIPS            | 2 |
| CD5L            | 2 |
| OLR1            | 2 |
| GPR68           | 2 |
| SCARB2          | 2 |
| HMG1L5          | 2 |
| LST1            | 2 |
| RP1             | 2 |
| GLIPR1          | 2 |
| IFIT1           | 2 |
| TRIM17          | 2 |
| ADAMTS5         | 2 |
| TRIM67          | 2 |
| HLA-F           | 2 |
| CREB3           | 2 |
| FPR3            | 2 |
| DCI             | 2 |
| OAS2            | 2 |
| TNFSF12-TNFSF13 | 2 |
| HNF4A           | 1 |
| GAD1            | 1 |
| BCL6            | 1 |
| KCNJ11          | 1 |
| CCND1           | 1 |
| NKX2-1          | 1 |
| GNAI2           | 1 |
| GIP             | 1 |
| C1QTNF1         | 1 |
| SHH             | 1 |
| POU5F1          | 1 |
| ABCG2           | 1 |
| ENPP3           | 1 |
| FURIN           | 1 |
| ETV6            | 1 |
| GATA4           | 1 |
| MGMT            | 1 |
| LMO2            | 1 |
| CTSC            | 1 |

|         |   |
|---------|---|
| KRT19   | 1 |
| BRD2    | 1 |
| GATA3   | 1 |
| FRTS    | 1 |
| SNAP25  | 1 |
| KLRG1   | 1 |
| CRS     | 1 |
| MAFA    | 1 |
| CCDC88A | 1 |
| ITGA2   | 1 |
| TRA     | 1 |
| CNTF    | 1 |
| SOX9    | 1 |
| PDXP    | 1 |
| BCL10   | 1 |
| SMUG1   | 1 |
| TCL1A   | 1 |
| DBF4    | 1 |
| CSPG4   | 1 |
| DSPP    | 1 |
| MDM2    | 1 |
| PCSK1   | 1 |
| TNC     | 1 |
| CKAP4   | 1 |
| FANCA   | 1 |
| TNNC1   | 1 |
| UVRAG   | 1 |
| KLF1    | 1 |
| IGLL1   | 1 |
| PLP1    | 1 |
| ELF4    | 1 |
| BTG2    | 1 |
| H19     | 1 |
| HCLS1   | 1 |
| YWHAB   | 1 |
| MATK    | 1 |
| RFXANK  | 1 |
| STATH   | 1 |
| MORF4   | 1 |
| ZFPM1   | 1 |



|         |   |
|---------|---|
| BLNK    | 1 |
| CDK6    | 1 |
| WNT3A   | 1 |
| TAC1    | 1 |
| CDAN1   | 1 |
| ASCL1   | 1 |
| TLX1    | 1 |
| SLC12A2 | 1 |
| MAP3K10 | 1 |
| SLC2A4  | 1 |
| RUNX3   | 1 |
| MSTO1   | 1 |
| SCARA3  | 1 |
| MPST    | 1 |
| PDGFRA  | 1 |
| SLC22A2 | 1 |
| PRDX5   | 1 |
| FLII    | 1 |
| KNTC1   | 1 |
| GPR132  | 1 |
| KRT17   | 1 |
| TIMM8A  | 1 |
| CDKL2   | 1 |
| CCDC91  | 1 |
| NLRP5   | 1 |
| PSMC1   | 1 |
| NR4A2   | 1 |
| RFC1    | 1 |
| CLPS    | 1 |
| HBA2    | 1 |
| RHOJ    | 1 |
| PRS     | 1 |
| GLMN    | 1 |
| MAP4K1  | 1 |
| LEP     | 1 |
| LYPD4   | 1 |
| CNR1    | 1 |
| RAN     | 1 |
| SP7     | 1 |
| TERT    | 1 |

|         |   |
|---------|---|
| POLR3E  | 1 |
| KIR2DL3 | 1 |
| AFM     | 1 |
| HESX1   | 1 |
| NEU1    | 1 |
| CBX8    | 1 |
| MLRG    | 1 |
| PRR6    | 1 |
| NSD1    | 1 |
| BMF     | 1 |
| MRO     | 1 |
| GHRL    | 1 |
| LSAMP   | 1 |
| ATF4    | 1 |
| CFD     | 1 |
| BLM     | 1 |
| RCBTB1  | 1 |
| ACLY    | 1 |
| RBL1    | 1 |
| HNRPDL  | 1 |
| CYP3A4  | 1 |
| SMAD1   | 1 |
| SON     | 1 |
| CREM    | 1 |
| GARS    | 1 |
| RYR1    | 1 |
| PLAT    | 1 |
| PDSS1   | 1 |
| GOLGA6  | 1 |
| EHMT1   | 1 |
| CNOT8   | 1 |
| CDH5    | 1 |
| DPAGT1  | 1 |
| LONP1   | 1 |
| ZBTB16  | 1 |
| GPT     | 1 |
| PSEN1   | 1 |
| MYH11   | 1 |
| LY75    | 1 |
| EPAS1   | 1 |

|          |   |
|----------|---|
| DEC      | 1 |
| FGF8     | 1 |
| NUMB     | 1 |
| VAC14    | 1 |
| LRPAP1   | 1 |
| TAP1     | 1 |
| GCA      | 1 |
| TBX1     | 1 |
| HMGA2    | 1 |
| SLC6A3   | 1 |
| SSFA2    | 1 |
| MMS      | 1 |
| PRDX1    | 1 |
| CHKA     | 1 |
| COIL     | 1 |
| UCP1     | 1 |
| NUCB2    | 1 |
| EIF4EBP1 | 1 |
| PTGER4   | 1 |
| PDXK     | 1 |
| CD2AP    | 1 |
| NCOR2    | 1 |
| PTPN2    | 1 |
| TERC     | 1 |
| CALR     | 1 |
| SMAD5    | 1 |
| NEFM     | 1 |
| HLA-DPB1 | 1 |
| TP73     | 1 |
| SLC35A1  | 1 |
| CP1      | 1 |
| EIF3A    | 1 |
| MRGPRF   | 1 |
| ACIN1    | 1 |
| KRT14    | 1 |
| RBM9     | 1 |
| SNAI2    | 1 |
| SH2D3C   | 1 |
| PSMD8    | 1 |
| CHAT     | 1 |

|          |   |
|----------|---|
| PDCD1LG2 | 1 |
| ILK      | 1 |
| ARHGAP24 | 1 |
| S100A4   | 1 |
| HBB      | 1 |
| GRIP1    | 1 |
| BCL11A   | 1 |
| HDAC3    | 1 |
| SLAMF7   | 1 |
| HLF      | 1 |
| CDT1     | 1 |
| DPT      | 1 |
| AIFM2    | 1 |
| GPR44    | 1 |
| PAWR     | 1 |
| EDNRB    | 1 |
| SULT1A1  | 1 |
| LEF1     | 1 |
| AGA      | 1 |
| CCL28    | 1 |
| PREP     | 1 |
| RAD23B   | 1 |
| MAML1    | 1 |
| ITGA3    | 1 |
| CCR9     | 1 |
| CDC2L1   | 1 |
| NQO1     | 1 |
| DNMT1    | 1 |
| MYO1G    | 1 |
| CCDC26   | 1 |
| SNORD87  | 1 |
| SCARNA5  | 1 |
| E2F4     | 1 |
| OMP      | 1 |
| CCL25    | 1 |
| DNAJC3   | 1 |
| CASZ1    | 1 |
| MLLT1    | 1 |
| CNBP     | 1 |
| SIL1     | 1 |

|         |   |
|---------|---|
| HAND1   | 1 |
| MXI1    | 1 |
| CFTR    | 1 |
| TBXAS1  | 1 |
| AGPS    | 1 |
| DNMT3B  | 1 |
| PSMD3   | 1 |
| PRIM2   | 1 |
| NTSR1   | 1 |
| PLCB1   | 1 |
| PLCB4   | 1 |
| KLF6    | 1 |
| ALKBH1  | 1 |
| TTN     | 1 |
| TIA1    | 1 |
| EXT1    | 1 |
| PIR     | 1 |
| TFE3    | 1 |
| LRSAM1  | 1 |
| EMD     | 1 |
| GGT1    | 1 |
| GNAS    | 1 |
| TALDO1  | 1 |
| CTD     | 1 |
| VHLL    | 1 |
| CSF3R   | 1 |
| MMP7    | 1 |
| C3AR1   | 1 |
| GIPC1   | 1 |
| PES1    | 1 |
| PRLR    | 1 |
| TMEM121 | 1 |
| AMELX   | 1 |
| IL1RN   | 1 |
| SLC6A8  | 1 |
| HSPA1A  | 1 |
| PLCG1   | 1 |
| GRN     | 1 |
| TAF8    | 1 |
| B2M     | 1 |

|              |   |
|--------------|---|
| CNC          | 1 |
| IPP          | 1 |
| ONECUT1      | 1 |
| LYL1         | 1 |
| RP4-691N24.1 | 1 |
| GGTLC3       | 1 |
| GGT2         | 1 |
| GGTLC4P      | 1 |
| GAL3ST1      | 1 |
| HCCS         | 1 |
| PTP4A3       | 1 |
| GGTLC5P      | 1 |
| PLB1         | 1 |
| ITCH         | 1 |
| SIM2         | 1 |
| MAPK8IP1     | 1 |
| MSH2         | 1 |
| LPO          | 1 |
| KIR2DL1      | 1 |
| HSPC159      | 1 |
| SAI1         | 1 |
| HBD          | 1 |
| WNT11        | 1 |
| KRT121P      | 1 |
| PKM2         | 1 |
| IKZF3        | 1 |
| MAFG         | 1 |
| LOX          | 1 |
| COPS5        | 1 |
| CHPT1        | 1 |
| ITGBL1       | 1 |
| LAMP1        | 1 |
| NOV          | 1 |
| MLXIP        | 1 |
| MYLIP        | 1 |
| ADCYAP1R1    | 1 |
| CCL4L1       | 1 |
| CD177        | 1 |
| GRP          | 1 |
| MCM8         | 1 |

|          |   |
|----------|---|
| MLANA    | 1 |
| PTLS     | 1 |
| OVGP1    | 1 |
| DDX6     | 1 |
| DSC3     | 1 |
| DAPK3    | 1 |
| PREB     | 1 |
| CHRNA4   | 1 |
| PSMG1    | 1 |
| ATR      | 1 |
| SLC25A20 | 1 |
| CDC25C   | 1 |
| RPS6KA2  | 1 |
| BACH2    | 1 |
| PRKDC    | 1 |
| FLNC     | 1 |
| PLG      | 1 |
| NR5A2    | 1 |
| SEPN1    | 1 |
| REM1     | 1 |
| ARAF     | 1 |
| TBK1     | 1 |
| MPI      | 1 |
| GTF2IRD1 | 1 |
| RFX5     | 1 |
| PAK1     | 1 |
| CRYGD    | 1 |
| MCC      | 1 |
| TRIM27   | 1 |
| CARD11   | 1 |
| ATP2A2   | 1 |
| CYP2E1   | 1 |
| PKN1     | 1 |
| FDPS     | 1 |
| HCST     | 1 |
| HOXC4    | 1 |
| SCGB1A1  | 1 |
| TYMS     | 1 |
| PPM2C    | 1 |
| CTS1     | 1 |

|           |   |
|-----------|---|
| GCY       | 1 |
| TNFSF4    | 1 |
| STX2      | 1 |
| KCNJ8     | 1 |
| KRT85     | 1 |
| LUM       | 1 |
| IFIH1     | 1 |
| HOXA5     | 1 |
| GNA12     | 1 |
| PIM2      | 1 |
| HNT       | 1 |
| GRIN1     | 1 |
| F11       | 1 |
| ZFP42     | 1 |
| MIRN155   | 1 |
| IL4R      | 1 |
| MYST1     | 1 |
| PTPN1     | 1 |
| MAPK1IP1L | 1 |
| MARS      | 1 |
| TCIRG1    | 1 |
| ELTD1     | 1 |
| FGF3      | 1 |
| MMAB      | 1 |
| BRIP1     | 1 |
| REXO1     | 1 |
| DNASE1L3  | 1 |
| LYPLA2P1  | 1 |
| ZC3HAV1   | 1 |
| CORT      | 1 |
| CAMLG     | 1 |
| TAZ       | 1 |
| BACH1     | 1 |
| MAZ       | 1 |
| TBC1D1    | 1 |
| NFE2L1    | 1 |
| MPG       | 1 |
| ANTXR1    | 1 |
| FOXO4     | 1 |
| YLPM1     | 1 |



|          |   |
|----------|---|
| SDHB     | 1 |
| MMP1     | 1 |
| RPS6KA5  | 1 |
| RASGRF1  | 1 |
| NPHS1    | 1 |
| ERBB4    | 1 |
| ATP6V1E1 | 1 |
| EVC2     | 1 |
| SCD5     | 1 |
| GSTA1    | 1 |
| MTSS1    | 1 |
| HEY1     | 1 |
| VCP      | 1 |
| USE1     | 1 |
| CANX     | 1 |
| MAPK7    | 1 |
| OPA1     | 1 |
| MTR      | 1 |
| CTNNB1   | 1 |
| NCOA3    | 1 |
| HOXC6    | 1 |
| CD109    | 1 |
| DAPK1    | 1 |
| CLEC2D   | 1 |
| FTH1     | 1 |
| HEBP1    | 1 |
| CBX5     | 1 |
| HOMER2   | 1 |
| LHCGR    | 1 |
| KIAA1524 | 1 |
| DAXX     | 1 |
| WASL     | 1 |
| HRSP12   | 1 |
| ABCC2    | 1 |
| UNG      | 1 |
| CD3E     | 1 |
| HSH2D    | 1 |
| GORASP2  | 1 |
| EDARADD  | 1 |
| IGFBP4   | 1 |

|         |   |
|---------|---|
| STX3    | 1 |
| LEPROT  | 1 |
| CYP1A2  | 1 |
| GAA     | 1 |
| CYR61   | 1 |
| KIR2DS1 | 1 |
| USF1    | 1 |
| CREG1   | 1 |
| RPL22   | 1 |
| PIK3C2A | 1 |
| CSAD    | 1 |
| ZNF385A | 1 |
| GZMB    | 1 |
| WARS    | 1 |
| FUT3    | 1 |
| ZNF160  | 1 |
| STAM2   | 1 |
| TNP1    | 1 |
| PDCD1   | 1 |
| ITSN2   | 1 |
| GART    | 1 |
| SLC25A1 | 1 |
| DDX17   | 1 |
| HNRNPD  | 1 |
| RNF39   | 1 |
| DLX5    | 1 |
| IFNB1   | 1 |
| CETN2   | 1 |
| RTCD1   | 1 |
| ZDHHC23 | 1 |
| HMBS    | 1 |
| SFRS8   | 1 |
| PDE3B   | 1 |
| ATF6    | 1 |
| C1orf9  | 1 |
| DHX9    | 1 |
| SOX4    | 1 |
| SAT1    | 1 |
| CPD     | 1 |
| HFE     | 1 |

|          |   |
|----------|---|
| IFITM1   | 1 |
| EBI3     | 1 |
| SRGN     | 1 |
| SLAMF6   | 1 |
| SYF2     | 1 |
| GTF2B    | 1 |
| EIF4G2   | 1 |
| DEAF1    | 1 |
| ARHGDIB  | 1 |
| FAM48A   | 1 |
| ZFP36L1  | 1 |
| RHOV     | 1 |
| CBFA2T3  | 1 |
| SLC6A4   | 1 |
| PPP1R9B  | 1 |
| GEMIN4   | 1 |
| ARHGDIA  | 1 |
| HDLBP    | 1 |
| SDCBP2   | 1 |
| BTLA     | 1 |
| WWTR1    | 1 |
| PROK2    | 1 |
| SLBP     | 1 |
| LARS     | 1 |
| SGK1     | 1 |
| AHI1     | 1 |
| WNT2     | 1 |
| IKBKAP   | 1 |
| TLE1     | 1 |
| HEMGN    | 1 |
| AGL      | 1 |
| SPA17    | 1 |
| NRF1     | 1 |
| LTC4S    | 1 |
| EIF4G1   | 1 |
| SERPIND1 | 1 |
| MAPKAPK2 | 1 |
| PSME1    | 1 |
| PRDM16   | 1 |
| CHP      | 1 |

|          |   |
|----------|---|
| HEXIM1   | 1 |
| PPIA     | 1 |
| CCRL2    | 1 |
| HK2      | 1 |
| NPB      | 1 |
| OGG1     | 1 |
| NS2      | 1 |
| PLF      | 1 |
| TRIT1    | 1 |
| CPN1     | 1 |
| CYP17A1  | 1 |
| SFTPD    | 1 |
| PSMA1    | 1 |
| SAA3P    | 1 |
| ARHGAP1  | 1 |
| NUP37    | 1 |
| KLHL1    | 1 |
| CFDP1    | 1 |
| ERN1     | 1 |
| CXXC1    | 1 |
| C19orf26 | 1 |
| HDAC4    | 1 |
| GSS      | 1 |
| TST      | 1 |
| TFDP2    | 1 |
| DLG1     | 1 |
| LMBR1    | 1 |
| SKAP2    | 1 |
| ANGPT2   | 1 |
| YAP1     | 1 |
| MARCO    | 1 |
| KCNT1    | 1 |
| MRAS     | 1 |
| RAG1AP1  | 1 |
| HOXD3    | 1 |
| PSMD2    | 1 |
| PAR1     | 1 |
| EPB41    | 1 |
| ZEB1     | 1 |
| PSMA6    | 1 |

|           |   |
|-----------|---|
| GOLGA4    | 1 |
| APOBEC3C  | 1 |
| YBX1      | 1 |
| KCNA5     | 1 |
| CYCSP38   | 1 |
| LOC137886 | 1 |
| PGM1      | 1 |
| SMAD6     | 1 |
| SMR3A     | 1 |
| UNK       | 1 |
| FLVCR2    | 1 |
| CROT      | 1 |
| GADD45G   | 1 |
| CCT       | 1 |
| DIH1      | 1 |
| PRD       | 1 |
| DBA2      | 1 |
| KCNN3     | 1 |
| TSG101    | 1 |
| HBE1      | 1 |
| NFYB      | 1 |
| MYEF2     | 1 |
| CYP11A1   | 1 |
| SRL       | 1 |
| ATP6V0D1  | 1 |
| DONSON    | 1 |
| RETNLB    | 1 |
| CDCP1     | 1 |
| THBS2     | 1 |
| HLA-DMA   | 1 |
| PRPH2     | 1 |
| TRPV6     | 1 |
| RAB11FIP1 | 1 |
| FUT7      | 1 |
| KIAA0020  | 1 |
| POF1B     | 1 |
| KAL1      | 1 |
| PDCD4     | 1 |
| NDUFB4    | 1 |
| ST14      | 1 |

|         |   |
|---------|---|
| DDX3Y   | 1 |
| PIAS3   | 1 |
| AVPR2   | 1 |
| BST1    | 1 |
| HOXD4   | 1 |
| CACNA1E | 1 |
| KCNH8   | 1 |
| CDK5R2  | 1 |
| PCK2    | 1 |
| EIF2S3  | 1 |
| NCOA1   | 1 |
| BNIP3L  | 1 |
| VISA    | 1 |
| NAGLU   | 1 |
| PTPRF   | 1 |
| TRPM2   | 1 |
| ABCC3   | 1 |
| MC3R    | 1 |
| SPTBN1  | 1 |
| NONO    | 1 |
| 9-Sep   | 1 |
| TSKU    | 1 |
| FOXL1   | 1 |
| POF1    | 1 |
| ADIPOR1 | 1 |
| UTS2    | 1 |
| CLEC2B  | 1 |
| PCID2   | 1 |
| CLCN7   | 1 |
| TIMP2   | 1 |
| KEAP1   | 1 |
| SIRT2   | 1 |
| TBC1D8  | 1 |
| NAG     | 1 |
| ASPRV1  | 1 |
| MAP4    | 1 |
| SPINK1  | 1 |
| HAVCR1  | 1 |
| GNB2L1  | 1 |
| MUTED   | 1 |

|           |   |
|-----------|---|
| DGKB      | 1 |
| CTSB      | 1 |
| ANXA13    | 1 |
| TPM2      | 1 |
| PTPRD     | 1 |
| RANBP2    | 1 |
| PXMP2     | 1 |
| ARHGAP26  | 1 |
| TRPC1     | 1 |
| HOXD10    | 1 |
| CYP4V2    | 1 |
| RAB5A     | 1 |
| NELL1     | 1 |
| SP4       | 1 |
| FOSL2     | 1 |
| WRN       | 1 |
| AOC2      | 1 |
| SPINT1    | 1 |
| CDC20     | 1 |
| DGKE      | 1 |
| NISCH     | 1 |
| HOXC5     | 1 |
| MYADM     | 1 |
| CKLF      | 1 |
| SFRS11    | 1 |
| DGUOK     | 1 |
| FAM110A   | 1 |
| CLEC6A    | 1 |
| IGKV3D-15 | 1 |
| IGKV1D-42 | 1 |
| IGKV3D-7  | 1 |
| TRRAP     | 1 |
| CECR      | 1 |
| LRE1      | 1 |
| TRI       | 1 |
| ORF1      | 1 |
| AA1       | 1 |
| RGS5      | 1 |
| TPR       | 1 |
| MYCL1     | 1 |

|         |   |
|---------|---|
| ACOT7   | 1 |
| CPT1A   | 1 |
| CLEC7A  | 1 |
| XRCC3   | 1 |
| FA2H    | 1 |
| UBTF    | 1 |
| ALOX15  | 1 |
| HOOK2   | 1 |
| INSL3   | 1 |
| KLK8    | 1 |
| NLRC4   | 1 |
| PLXNB2  | 1 |
| ZBTB20  | 1 |
| TBL1XR1 | 1 |
| ABCC5   | 1 |
| XCR1    | 1 |
| TRPC3   | 1 |
| TLR10   | 1 |
| SPARCL1 | 1 |
| SNCA    | 1 |
| HAVCR2  | 1 |
| STK10   | 1 |
| ADAMTS2 | 1 |
| DEK     | 1 |
| ETV7    | 1 |
| NDUFB6  | 1 |
| GAB3    | 1 |
| XIST    | 1 |
| REXO2   | 1 |
| PRKCSH  | 1 |
| TSPAN33 | 1 |
| LCN2    | 1 |
| GIMAP5  | 1 |
| ULBP1   | 1 |
| MGST1   | 1 |
| HOXD11  | 1 |
| HOXD8   | 1 |
| RGL1    | 1 |
| ACSM3   | 1 |
| SRR     | 1 |



|           |   |
|-----------|---|
| LGALS9    | 1 |
| TNFRSF10C | 1 |
| RYR2      | 1 |
| SLC22A18  | 1 |
| ARSH      | 1 |
| PICK1     | 1 |
| MAFF      | 1 |
| UBE2K     | 1 |
| FZD2      | 1 |
| LSR       | 1 |
| FFAR2     | 1 |
| SP2       | 1 |
| PLEKHG2   | 1 |
| FAAH      | 1 |
| PRMT1     | 1 |
| KLK2      | 1 |
| KIF2A     | 1 |
| SMN2      | 1 |
| KLF5      | 1 |
| CLN5      | 1 |
| GSTZ1     | 1 |
| TUBB3     | 1 |
| IGKV1D-43 | 1 |
| AMCN      | 1 |
| CLN4      | 1 |
| DGCR      | 1 |
| KIR2DS5   | 1 |
| XIC       | 1 |
| KTWS      | 1 |
| YY1AP1    | 1 |
| ERCC6     | 1 |
| KIN       | 1 |
| APLNR     | 1 |
| OSBP      | 1 |
| KRT1      | 1 |
| CALCOCO1  | 1 |
| EFNB2     | 1 |
| ABCC4     | 1 |
| TP53BP1   | 1 |
| SHF       | 1 |

|          |   |
|----------|---|
| LARP6    | 1 |
| TMEM11   | 1 |
| KCNH4    | 1 |
| DUSP3    | 1 |
| INTS2    | 1 |
| CSH2     | 1 |
| ASGR1    | 1 |
| NT5C     | 1 |
| SLC25A19 | 1 |
| STAP2    | 1 |
| LRG1     | 1 |
| EMR4     | 1 |
| SPATA2   | 1 |
| ZNF148   | 1 |
| PBRM1    | 1 |
| MAPK10   | 1 |
| EEF1B3   | 1 |
| ENC1     | 1 |
| HBS1L    | 1 |
| MICC     | 1 |
| PHIP     | 1 |
| NDUFA5   | 1 |
| SEMA3A   | 1 |
| STC1     | 1 |
| TRIM35   | 1 |
| ELK1     | 1 |
| WNT2B    | 1 |
| SEC23IP  | 1 |
| HSF2     | 1 |
| MAGEC1   | 1 |
| CKS1B    | 1 |
| SGCD     | 1 |
| FCER1A   | 1 |
| SLAMF8   | 1 |
| HOXD9    | 1 |
| HOXD1    | 1 |
| ARF1     | 1 |
| RAB4A    | 1 |
| LRRFIP1  | 1 |
| SNED1    | 1 |

|          |   |
|----------|---|
| SFN      | 1 |
| TGFBR2   | 1 |
| RING1    | 1 |
| FXYD1    | 1 |
| PLK3     | 1 |
| PDE1B    | 1 |
| MAP3K3   | 1 |
| ADRM1    | 1 |
| C11orf2  | 1 |
| PDE4B    | 1 |
| HPR      | 1 |
| DOK1     | 1 |
| F2RL1    | 1 |
| GAN      | 1 |
| FOXF1    | 1 |
| ARF1P1   | 1 |
| DCR      | 1 |
| ERVK2    | 1 |
| ERVK3    | 1 |
| IGES     | 1 |
| KIR2DL4  | 1 |
| PDR      | 1 |
| SM1      | 1 |
| ZBTB17   | 1 |
| MYOC     | 1 |
| RGS10    | 1 |
| ABI1     | 1 |
| NELL2    | 1 |
| CCNT1    | 1 |
| NACA     | 1 |
| PPP1R12A | 1 |
| DCN      | 1 |
| GZMH     | 1 |
| DLG7     | 1 |
| LGMN     | 1 |
| DAPK2    | 1 |
| SIN3A    | 1 |
| KRT32    | 1 |
| HN1      | 1 |
| PSCD1    | 1 |

|          |   |
|----------|---|
| NKG7     | 1 |
| EGR4     | 1 |
| THBD     | 1 |
| CSNK2A1  | 1 |
| NRIP1    | 1 |
| TYMP     | 1 |
| P2RY12   | 1 |
| CSPG5    | 1 |
| TRAIP    | 1 |
| TACR3    | 1 |
| HPGD     | 1 |
| CCL24    | 1 |
| ADFP     | 1 |
| TFG      | 1 |
| CRIP2    | 1 |
| GFI1B    | 1 |
| PURA     | 1 |
| GRM1     | 1 |
| FLAD1    | 1 |
| SDHC     | 1 |
| HRH2     | 1 |
| GRK6     | 1 |
| MED15    | 1 |
| C1orf107 | 1 |
| LRMP     | 1 |
| KLF13    | 1 |
| GREM1    | 1 |
| SETD1A   | 1 |
| TCF19    | 1 |
| RYR3     | 1 |
| PPARD    | 1 |
| AHRR     | 1 |
| RLF      | 1 |
| NMT1     | 1 |
| RN7SK    | 1 |
| MS4A7    | 1 |
| SOCS6    | 1 |
| BIRC5    | 1 |
| SNORD15A | 1 |
| ANXA1    | 1 |

|          |   |
|----------|---|
| MC1R     | 1 |
| PNRC1    | 1 |
| SLC25A3  | 1 |
| AFA      | 1 |
| FEA      | 1 |
| BPP      | 1 |
| HCA1     | 1 |
| C1orf102 | 1 |
| AKR1C2   | 1 |
| MPZL2    | 1 |
| C1QTNF5  | 1 |
| LTBP3    | 1 |
| KLRC3    | 1 |
| GPR109A  | 1 |
| GPR109B  | 1 |
| HTR2A    | 1 |
| NDRG2    | 1 |
| SLC7A8   | 1 |
| TINF2    | 1 |
| GMFB     | 1 |
| PNMA1    | 1 |
| OCA2     | 1 |
| SELS     | 1 |
| POLR3K   | 1 |
| MYLK3    | 1 |
| MYO18A   | 1 |
| LILRB3   | 1 |
| CCDC115  | 1 |
| GBX2     | 1 |
| KCNG1    | 1 |
| THOC5    | 1 |
| KCNJ4    | 1 |
| MYLK     | 1 |
| P2RY13   | 1 |
| PPARGC1A | 1 |
| C5orf20  | 1 |
| ADAM19   | 1 |
| EPHA7    | 1 |
| ATG9B    | 1 |
| PABPC1   | 1 |

|          |   |
|----------|---|
| OPRK1    | 1 |
| CDK5RAP2 | 1 |
| AMN      | 1 |
| RGS3     | 1 |
| SORL1    | 1 |
| FTMT     | 1 |
| RNF139   | 1 |
| RXRA     | 1 |
| CASP2    | 1 |
| SLC6A7   | 1 |
| HSPA7    | 1 |
| ADAM29   | 1 |
| EPHB3    | 1 |
| RGS13    | 1 |
| RHOB     | 1 |
| MMP11    | 1 |
| SMARCB1  | 1 |
| NFE2L3   | 1 |
| RPL21    | 1 |
| MYLK2    | 1 |
| AQP1     | 1 |
| ITGAD    | 1 |
| DYNLRB1  | 1 |
| CCNY     | 1 |
| CASC5    | 1 |
| CAPNS1   | 1 |
| WDR76    | 1 |
| SHD      | 1 |
| AEBP1    | 1 |
| ZNF35    | 1 |
| TGM4     | 1 |
| NR1H3    | 1 |
| GRLF1    | 1 |
| PAICS    | 1 |
| PTPRG    | 1 |
| TNFSF9   | 1 |
| STAP1    | 1 |
| HNRNPH3  | 1 |
| CD300A   | 1 |
| TAF1     | 1 |

|           |   |
|-----------|---|
| FOLR2     | 1 |
| OSTF1     | 1 |
| ATP6V0D2  | 1 |
| IGKV2D-14 | 1 |
| IGKV2D-10 | 1 |
| CPSF4     | 1 |
| DCE       | 1 |
| KIR3DS1   | 1 |
| MBS1      | 1 |
| MIRN15B   | 1 |
| ACTD      | 1 |
| DBT       | 1 |
| CTSS      | 1 |
| SLAMF9    | 1 |
| CDC42BPA  | 1 |
| INCA      | 1 |
| ZNF202    | 1 |
| TOLLIP    | 1 |
| SAA4      | 1 |
| DDB1      | 1 |
| SLCO1A2   | 1 |
| CSRP2     | 1 |
| SPG20     | 1 |
| FABP5L1   | 1 |
| LTBP2     | 1 |
| SNORD16   | 1 |
| TSPAN3    | 1 |
| ACSBG1    | 1 |
| ARL6IP1   | 1 |
| KRT34     | 1 |
| P2RX1     | 1 |
| VEZF1     | 1 |
| EPR1      | 1 |
| LMAN1     | 1 |
| LPHN1     | 1 |
| DNAJB1    | 1 |
| SIGLEC11  | 1 |
| NLRP12    | 1 |
| NLRP7     | 1 |
| NLRP11    | 1 |

|         |   |
|---------|---|
| CLEC4G  | 1 |
| 10-Sep  | 1 |
| DNAJB1P | 1 |
| DTNB    | 1 |
| FABP1   | 1 |
| RGS19   | 1 |
| NFAM1   | 1 |
| CPN2    | 1 |
| IMPDH2  | 1 |
| LNX1    | 1 |
| TSPAN5  | 1 |
| GTPBP2  | 1 |
| ZNF117  | 1 |
| ERV3    | 1 |
| PON2    | 1 |
| TCEA1   | 1 |
| ACSL4   | 1 |
| ARD1A   | 1 |
| NUDT11  | 1 |
| NGFRAP1 | 1 |
| GSTM2   | 1 |
| P2RX4   | 1 |
| ARF5    | 1 |
| KHDRBS3 | 1 |
| AKAP12  | 1 |
| LCAP    | 1 |
| TSPAN13 | 1 |
| RGS14   | 1 |
| 5-Sep   | 1 |
| CDKL5   | 1 |
| NDUFA13 | 1 |
| DHRS2   | 1 |
| BTN3A1  | 1 |
| NLRP6   | 1 |
| NCF4    | 1 |
| RRM1    | 1 |
| ZNF382  | 1 |
| MAOA    | 1 |
| SLC27A2 | 1 |
| FNDC3A  | 1 |



|           |   |
|-----------|---|
| ARF6      | 1 |
| FUT2      | 1 |
| NUCB1     | 1 |
| TINAG     | 1 |
| RGS20     | 1 |
| SIGLECP16 | 1 |
| TRIM22    | 1 |
| LILRA1    | 1 |
| RCE1      | 1 |
| POLS      | 1 |
| C2orf13   | 1 |
| ARL6IP5   | 1 |
| IGBP1     | 1 |
| TJP2      | 1 |
| PLEKHB1   | 1 |
| PAAF1     | 1 |
| UPRT      | 1 |
| BMP6      | 1 |
| FABP5     | 1 |
| XRCC4     | 1 |
| SEMA4B    | 1 |
| EBM       | 1 |
| GTS       | 1 |
| LAMA1     | 1 |
| AD8       | 1 |
| RA6       | 1 |
| BW6       | 1 |
| BW61      | 1 |
| SRM       | 1 |
| CHIT1     | 1 |
| GCLM      | 1 |
| NMT2      | 1 |
| WAPAL     | 1 |
| TRPC6     | 1 |
| MRV11     | 1 |
| APOA1     | 1 |
| ROBO4     | 1 |
| TH        | 1 |
| CUGBP1    | 1 |
| MPEG1     | 1 |

|          |   |
|----------|---|
| NLRP10   | 1 |
| OASL     | 1 |
| RPAP3    | 1 |
| TRPC4    | 1 |
| SLC15A1  | 1 |
| GPR18    | 1 |
| SLC22A17 | 1 |
| MOAP1    | 1 |
| VPS39    | 1 |
| IGSF6    | 1 |
| GOT2     | 1 |
| PSMB10   | 1 |
| LCAT     | 1 |
| MYH4     | 1 |
| GIT1     | 1 |
| HCRT     | 1 |
| KDSR     | 1 |
| PSG5     | 1 |
| KLK15    | 1 |
| GPR1     | 1 |
| IGKV2-30 | 1 |
| SRMS     | 1 |
| FSTL1    | 1 |
| ITGB5    | 1 |
| RPN1     | 1 |
| VPRBP    | 1 |
| PDE5A    | 1 |
| 1-Mar    | 1 |
| P4HA2    | 1 |
| DIAPH1   | 1 |
| DDO      | 1 |
| HIST1H1D | 1 |
| TRIM10   | 1 |
| DDAH2    | 1 |
| TREML1   | 1 |
| TREML2   | 1 |
| CRIP3    | 1 |
| CRISP3   | 1 |
| MTPN     | 1 |
| CYP11B2  | 1 |

|           |   |
|-----------|---|
| PUF60     | 1 |
| CKS1A     | 1 |
| PTGES2    | 1 |
| P2RY11    | 1 |
| KIF1B     | 1 |
| ZC3H12C   | 1 |
| TRAFD1    | 1 |
| IGSF2     | 1 |
| DCPS      | 1 |
| CALU      | 1 |
| PRSS1     | 1 |
| SNX9      | 1 |
| ASMT      | 1 |
| BLZF1     | 1 |
| DDA1      | 1 |
| CABLES1   | 1 |
| SP100     | 1 |
| SARM1     | 1 |
| NR1D2     | 1 |
| FARP2     | 1 |
| ADAM28    | 1 |
| ADRBK2    | 1 |
| HIST1H1E  | 1 |
| GYG2      | 1 |
| BRE       | 1 |
| MLLT6     | 1 |
| UBAP1     | 1 |
| H1F0      | 1 |
| GCAT      | 1 |
| RND2      | 1 |
| ARL4D     | 1 |
| DBF4B     | 1 |
| SACM1L    | 1 |
| UPP1      | 1 |
| ARIH2     | 1 |
| STAB1     | 1 |
| LDHAL6B   | 1 |
| PSMA3     | 1 |
| SERPINB10 | 1 |
| NLRP4     | 1 |

|          |   |
|----------|---|
| ZC3H12B  | 1 |
| ERBB2IP  | 1 |
| RABGEF1  | 1 |
| NUTF2    | 1 |
| EFNB1    | 1 |
| TET1     | 1 |
| ICT1     | 1 |
| LRRC8C   | 1 |
| IFIT5    | 1 |
| TMPO     | 1 |
| CNN2     | 1 |
| KLRF1    | 1 |
| ARL6     | 1 |
| MARVELD1 | 1 |
| FRA11B   | 1 |
| LRE2     | 1 |
| LRE3     | 1 |
| LRE4     | 1 |
| COX1     | 1 |
| PRR1     | 1 |
| TRNAP1   | 1 |
| TYS      | 1 |
| RCD2     | 1 |
| SBS      | 1 |
| UGT1A9   | 1 |
| UGT1A1   | 1 |
| KIR2DL5A | 1 |
| MIRN146A | 1 |
| BW62     | 1 |
| KIR2DL5B | 1 |
| WARS2    | 1 |
| DDAH1    | 1 |
| RSU1     | 1 |
| HTR7     | 1 |
| MMP27    | 1 |
| BACE1    | 1 |
| SNORA54  | 1 |
| C11orf40 | 1 |
| CKAP5    | 1 |
| MACROD1  | 1 |

|          |   |
|----------|---|
| PTPRCAP  | 1 |
| CACNA2D4 | 1 |
| YARS2    | 1 |
| ABCD2    | 1 |
| PAN2     | 1 |
| HEXA     | 1 |
| ACCN1    | 1 |
| CDH19    | 1 |
| ZNF675   | 1 |
| TBXA2R   | 1 |
| PSG11    | 1 |
| PSG9     | 1 |
| GPR4     | 1 |
| MYO1F    | 1 |
| RDH14    | 1 |
| NAGA     | 1 |
| DUSP7    | 1 |
| GBE1     | 1 |
| CDH12    | 1 |
| SEMA5A   | 1 |
| SRPK2    | 1 |
| SETX     | 1 |
| OAS1     | 1 |
| LRRC8A   | 1 |
| NARG1    | 1 |
| NOTCH2NL | 1 |
| NOMO1    | 1 |
| ACCN3    | 1 |
| MAP3K13  | 1 |
| CFHR3    | 1 |
| GBL      | 1 |
| ACCN4    | 1 |
| SORBS3   | 1 |
| GUK1     | 1 |
| DUSP22   | 1 |
| NOL5A    | 1 |
| ZNF267   | 1 |
| CAPRIN1  | 1 |
| WDR19    | 1 |
| PDE9A    | 1 |

|          |   |
|----------|---|
| RBM3     | 1 |
| ACCN2    | 1 |
| PAQR8    | 1 |
| HNRNPA1  | 1 |
| PRKCH    | 1 |
| ZNF324   | 1 |
| SLC25A26 | 1 |
| SLC7A6   | 1 |
| ZFAND6   | 1 |
| LRRC8E   | 1 |
| LRRC8B   | 1 |
| IGKV1D-8 | 1 |
| LRRC8D   | 1 |
| LPPR4    | 1 |
| CNPY4    | 1 |
| BCRL3    | 1 |
| CORD1    | 1 |
| FSP      | 1 |
| HCL3     | 1 |
| ZNF126   | 1 |
| TRR      | 1 |
| PRG1     | 1 |
| UGT1A10  | 1 |
| UGT1A8   | 1 |
| UGT1A7   | 1 |
| UGT1A6   | 1 |
| UGT1A5   | 1 |
| UGT1A4   | 1 |
| RLFP     | 1 |
| C22orf17 | 1 |

---
