# Supplementary material for: Reconstruction of Monocyte Transcriptional Regulatory Network Accompanies Monocytic Functions in Human Fibroblasts
Source: PubMed Central journal article supplement (PMC3302774; doi:10.1371/journal.pone.0033474), 2012-03-13
Supplement: pone.0033474.s004.pdf [file pone.0033474.s004.pdf]

Table S2 Human transcription factor list

| EntrezGene | Symbol    | Symbol TR | Gene Name TR                                                                                                                   |
|------------|-----------|-----------|--------------------------------------------------------------------------------------------------------------------------------|
| 26574      | AATF      | AATF      | APOPTOSIS ANTAGONIZING TRANSCRIPTION FACTOR                                                                                    |
| 136847     | C1orf11   | ABHS      | CHROMOSOME 7 OPEN READING FRAME 11                                                                                             |
| 25         | ABL1      | ABL1      | V-ABL ABELSON MURINE LEUKEMIA VIRAL ONCOGENE HOMOLOG 1                                                                         |
| 29777      | ABT1      | ABT1      | ACTIVATOR OF BASAL TRANSCRIPTION 1                                                                                             |
| 80325      | ABTB1     | ABTB1     | ANKYRIN REPEAT AND BTB (POZ) DOMAIN CONTAINING 1                                                                               |
| 23394      | ADNP      | ADNP      | ACTIVITY-DEPENDENT NEUROPROTECTOR                                                                                              |
| 22850      | KIAA0863  | ADNP2     | ADNP homeobox 2                                                                                                                |
| 165        | AEBP1     | AEBP1     | AE BINDING PROTEIN 1                                                                                                           |
| 121536     | AEBP2     | AEBP2     | AE BINDING PROTEIN 2                                                                                                           |
| 186        | AES       | AES       | AMINO-TERMINAL ENHANCER OF SPLIT                                                                                               |
| 4299       | AFF1      | AFF1      | AF4/FMR2 FAMILY, MEMBER 1                                                                                                      |
| 3899       | AFF3      | AFF3      | AF4/FMR2 FAMILY, MEMBER 3                                                                                                      |
| 27125      | AFF4      | AFF4      | AF4/FMR2 FAMILY, MEMBER 4                                                                                                      |
| 25909      | AHCTF1    | AHCTF1    | AT HOOK CONTAINING TRANSCRIPTION FACTOR 1                                                                                      |
| 196        | AHR       | AHR       | ARYL HYDROCARBON RECEPTOR                                                                                                      |
| 9049       | AIP       | AIP       | ARYL HYDROCARBON RECEPTOR INTERACTING PROTEIN                                                                                  |
| 326        | AIRE      | AIRE      | AUTOIMMUNE REGULATOR (AUTOIMMUNE POLYENDOCRINOPATHY CANDIDIASIS ECTODERMAL DYSTROPHY)                                          |
| 11036      | ALF       | ALF       | TFIIA-ALPHA/BETA-LIKE FACTOR                                                                                                   |
| 79800      | ALS2CR8   | ALS2CR8   | AMYOTROPHIC LATERAL SCLEROSIS 2 (JUVENILE) CHROMOSOME REGION, CANDIDATE 8                                                      |
| 257        | ALX3      | ALX3      | ARISTALESS-LIKE HOMEBOX 3                                                                                                      |
| 60529      | ALX4      | ALX4      | ARISTALESS-LIKE HOMEBOX 4                                                                                                      |
| 57763      | ANKRA2    | ANKRA2    | ANKYRIN REPEAT, FAMILY A (RFXANK-LIKE), 2                                                                                      |
| 27063      | ANKRD1    | ANKRD1    | ANKYRIN REPEAT DOMAIN 1 (CARDIAC MUSCLE)                                                                                       |
| 55608      | ANKRD10   | ANKRD10   | ANKYRIN REPEAT DOMAIN 10                                                                                                       |
| 26287      | ANKRD2    | ANKRD2    | ANKYRIN REPEAT DOMAIN 2 (STRETCH RESPONSIVE MUSCLE)                                                                            |
| 118932     | ANKRD22   | ANKRD22   | ANKYRIN REPEAT DOMAIN 22                                                                                                       |
| 25959      | ANKRD25   | ANKRD25   | ANKYRIN REPEAT DOMAIN 25                                                                                                       |
| 91074      | ANKRD30A  | ANKRD30A  | ANKYRIN REPEAT DOMAIN 30A                                                                                                      |
| 84250      | ANKRD32   | ANKRD32   | ANKYRIN REPEAT DOMAIN 32                                                                                                       |
| 341405     | ANKRD33   | ANKRD33   | ANKYRIN REPEAT DOMAIN 33                                                                                                       |
| 338599     | ANKRD42   | ANKRD42   | ANKYRIN REPEAT DOMAIN 42                                                                                                       |
| 339416     | ANKRD45   | ANKRD45   | ANKYRIN REPEAT DOMAIN 45                                                                                                       |
| 54851      | ANKRD49   | ANKRD49   | ANKYRIN REPEAT DOMAIN 49                                                                                                       |
| 63926      | ANKRD5    | ANKRD5    | ANKYRIN REPEAT DOMAIN 5                                                                                                        |
| 129138     | LOC129138 | ANKRD54   | ankyrin repeat domain 54                                                                                                       |
| 79722      | FLJ11795  | ANKRD55   | ankyrin repeat domain 55                                                                                                       |
| 65124      | C2orf26   | ANKRD57   | ankyrin repeat domain 57                                                                                                       |
| 22881      | ANKRD6    | ANKRD6    | ANKYRIN REPEAT DOMAIN 6                                                                                                        |
| 56311      | ANKRD7    | ANKRD7    | ANKYRIN REPEAT DOMAIN 7                                                                                                        |
| 23294      | ANKS1A    | ANKS1A    | ANKYRIN REPEAT AND STERILE ALPHA MOTIF DOMAIN CONTAINING 1A                                                                    |
| 124401     | ANKS3     | ANKS3     | ANKYRIN REPEAT AND STERILE ALPHA MOTIF DOMAIN CONTAINING 3                                                                     |
| 55139      | ANKZF1    | ANKZF1    | ANKYRIN REPEAT AND ZINC FINGER DOMAIN CONTAINING 1                                                                             |
| 322        | APBB1     | APBB1     | AMYLOID BETA (A4) PRECURSOR PROTEIN-BINDING, FAMILY B, MEMBER 1 (FE65)                                                         |
| 323        | APBB2     | APBB2     | AMYLOID BETA (A4) PRECURSOR PROTEIN-BINDING, FAMILY B, MEMBER 2 (FE65-LIKE)                                                    |
| 324        | APC       | APC       | ADENOMATOSIS POLYPOSIS COLI                                                                                                    |
| 328        | APEX1     | APEX1     | APEX NUCLEASE (MULTIFUNCTIONAL DNA REPAIR ENZYME) 1                                                                            |
| 367        | AR        | AR        | ANDROGEN RECEPTOR (DIHYDROTESTOSTERONE RECEPTOR; TESTICULAR FEMINIZATION; SPINAL AND BULBAR MUSCULAR ATROPHY; KENNEDY DISEASE) |
| 8289       | ARID1A    | ARID1A    | AT RICH INTERACTIVE DOMAIN 1A (SWI- LIKE)                                                                                      |
| 57492      | ARID1B    | ARID1B    | DAN15 PROTEIN                                                                                                                  |
| 1820       | ARID3A    | ARID3A    | AT RICH INTERACTIVE DOMAIN 3A (BRIGHT- LIKE)                                                                                   |
| 10820      | ARID3B    | ARID3B    | AT RICH INTERACTIVE DOMAIN 3B (BRIGHT- LIKE)                                                                                   |
| 5926       | ARID4A    | ARID4A    | AT RICH INTERACTIVE DOMAIN 4A (RBP1-LIKE)                                                                                      |
| 51742      | ARID4B    | ARID4B    | AT RICH INTERACTIVE DOMAIN 4B (RBP1- LIKE)                                                                                     |
| 84159      | ARID5B    | ARID5B    | AT RICH INTERACTIVE DOMAIN 5B (MRF1-LIKE)                                                                                      |
| 405        | ARNT      | ARNT      | ARYL HYDROCARBON RECEPTOR NUCLEAR TRANSLOCATOR                                                                                 |
| 9915       | ARNT2     | ARNT2     | ARYL-HYDROCARBON RECEPTOR NUCLEAR TRANSLOCATOR 2                                                                               |
| 406        | ARNTL     | ARNTL     | ARYL HYDROCARBON RECEPTOR NUCLEAR TRANSLOCATOR-LIKE                                                                            |
| 56938      | ARNTL2    | ARNTL2    | ARYL HYDROCARBON RECEPTOR NUCLEAR TRANSLOCATOR-LIKE 2                                                                          |
| 170302     | ARX       | ARX       | ARISTALESS RELATED HOMEBOX                                                                                                     |
| 51685      | ASB1      | ASB1      | ANKYRIN REPEAT AND SOCS BOX-CONTAINING 1                                                                                       |
| 136371     | ASB10     | ASB10     | ANKYRIN REPEAT AND SOCS BOX-CONTAINING 10                                                                                      |
| 140456     | ASB11     | ASB11     | ANKYRIN REPEAT AND SOCS BOX-CONTAINING 11                                                                                      |
| 142689     | ASB12     | ASB12     | ANKYRIN REPEAT AND SOCS BOX-CONTAINING 12                                                                                      |
| 142685     | ASB15     | ASB15     | ANKYRIN REPEAT AND SOCS BOX-CONTAINING 15                                                                                      |
| 51130      | ASB3      | ASB3      | ANKYRIN REPEAT AND SOCS BOX-CONTAINING 3                                                                                       |
| 51666      | ASB4      | ASB4      | ANKYRIN REPEAT AND SOCS BOX-CONTAINING 4                                                                                       |
| 140459     | ASB6      | ASB6      | LIKELY ORTHOLOG OF MOUSE ANKYRIN REPEAT AND SOCS BOX-CONTAINING PROTEIN 6                                                      |
| 140461     | ASB8      | ASB8      | ANKYRIN REPEAT AND SOCS BOX-CONTAINING 8                                                                                       |
| 140462     | ASB9      | ASB9      | DKFZP594L086Z PROTEIN                                                                                                          |
| 51008      | ASCC1     | ASCC1     | ACTIVATING SIGNAL COINTEGRATOR 1 COMPLEX SUBUNIT 1                                                                             |
| 84164      | ASCC2     | ASCC2     | HYPOTHETICAL PROTEIN DKFZP586G0223                                                                                             |
| 10973      | ASCC3     | ASCC3     | ACTIVATING SIGNAL COINTEGRATOR 1 COMPLEX SUBUNIT 3                                                                             |
| 429        | ASCL1     | ASCL1     | ACHAETE-SCUTE COMPLEX-LIKE 1 (DROSOPHILA)                                                                                      |
| 430        | ASCL2     | ASCL2     | ACHAETE-SCUTE COMPLEX-LIKE 2 (DROSOPHILA)                                                                                      |
| 56676      | ASCL3     | ASCL3     | ACHAETE-SCUTE COMPLEX (DROSOPHILA) HOMOLOG-LIKE 3                                                                              |
| 55870      | ASH1L     | ASH1L     | ASH1 (ABSENT, SMALL, OR HOMEOTIC)-LIKE (DROSOPHILA)                                                                            |
| 9070       | ASH2L     | ASH2L     | ASH2 (ABSENT, SMALL, OR HOMEOTIC)-LIKE (DROSOPHILA)                                                                            |
| 171023     | ASXL1     | ASXL1     | KIAA0978 PROTEIN                                                                                                               |
| 463        | ATBF1     | ATBF1     | AT-BINDING TRANSCRIPTION FACTOR 1                                                                                              |
| 466        | ATF1      | ATF1      | ACTIVATING TRANSCRIPTION FACTOR 1                                                                                              |
| 1386       | ATF2      | ATF2      | ACTIVATING TRANSCRIPTION FACTOR 2                                                                                              |
| 467        | ATF3      | ATF3      | ACTIVATING TRANSCRIPTION FACTOR 3                                                                                              |
| 468        | ATF4      | ATF4      | ACTIVATING TRANSCRIPTION FACTOR 4 (TAX-RESPONSIVE ENHANCER ELEMENT B67)                                                        |
| 22809      | ATF5      | ATF5      | ACTIVATING TRANSCRIPTION FACTOR 5                                                                                              |
| 22926      | ATF6      | ATF6      | ACTIVATING TRANSCRIPTION FACTOR 6                                                                                              |
| 11016      | ATF7      | ATF7      | ACTIVATING TRANSCRIPTION FACTOR 7                                                                                              |
| 55729      | ATF7IP    | ATF7IP    | activating transcription factor 7 interacting protein                                                                          |
| 472        | ATM       | ATM       | ATAXIA TELANGIECTASIA MUTATED (INCLUDES COMPLEMENTATION GROUPS A, C AND D)                                                     |
| 474        | ATOH1     | ATOH1     | ATONAL HOMOLOG 1 (DROSOPHILA)                                                                                                  |
| 5466       | ATRX      | ATRX      | ALPHA THALASSEMIA/MENTAL RETARDATION SYNDROME X-LINKED (RAD54 HOMOLOG, S. CEREVISIAE)                                          |
| 571        | BACH1     | BACH1     | BTB AND CNC HOMOLOG 1, BASIC LEUCINE ZIPPER TRANSCRIPTION FACTOR 1                                                             |
| 60468      | BACH2     | BACH2     | BTB AND CNC HOMOLOG 2, BASIC LEUCINE ZIPPER TRANSCRIPTION FACTOR 2                                                             |
| 579        | BAPX1     | BAPX1     | BAGPIPE HOMEBOX HOMOLOG 1 (DROSOPHILA)                                                                                         |
| 580        | BARD1     | BARD1     | BRCA1 ASSOCIATED RING DOMAIN 1                                                                                                 |
| 56751      | BARHL1    | BARHL1    | BARH-LIKE 1 (DROSOPHILA)                                                                                                       |
| 343472     | BARHL2    | BARHL2    | BARH-LIKE 2 (DROSOPHILA)                                                                                                       |
| 56033      | BARX1     | BARX1     | BARH-LIKE HOMEBOX 1                                                                                                            |
| 8538       | BARX2     | BARX2     | BARH-LIKE HOMEBOX 2                                                                                                            |
| 10538      | BATF      | BATF      | BASIC LEUCINE ZIPPER TRANSCRIPTION FACTOR, ATF-LIKE                                                                            |
| 111177     | BAZ1A     | BAZ1A     | BROMODOMAIN ADJACENT TO ZINC FINGER DOMAIN, 1A                                                                                 |
| 9031       | BAZ1B     | BAZ1B     | WILLIAMS-BEUREN SYNDROME CHROMOSOME REGION 10                                                                                  |
| 29994      | BAZ2B     | BAZ2B     | DKFZP434H071 PROTEIN                                                                                                           |
| 56987      | BBX       | BBX       | BOBBY SOX HOMOLOG (DROSOPHILA)                                                                                                 |
| 53335      | BCL11A    | BCL11A    | B-CELL CLL/LYMPHOMA 11A (ZINC FINGER PROTEIN)                                                                                  |
| 64919      | BCL11B    | BCL11B    | B-CELL CLL/LYMPHOMA 11B (ZINC FINGER PROTEIN)                                                                                  |
| 602        | BCL3      | BCL3      | B-CELL CLL/LYMPHOMA 3                                                                                                          |
| 604        | BCL6      | BCL6      | B-CELL CLL/LYMPHOMA 6 (ZINC FINGER PROTEIN 51)                                                                                 |
| 235877     | BCL6B     | BCL6B     | B-CELL CLL/LYMPHOMA 6, MEMBER B (ZINC FINGER PROTEIN)                                                                          |
| 9774       | BCLAF1    | BCLAF1    | BCL2-ASSOCIATED TRANSCRIPTION FACTOR 1                                                                                         |
| 54880      | BCOR      | BCOR      | BCL6 CO-REPRESSOR                                                                                                              |
| 55814      | BDP1      | BDP1      | B DOUBLE PRIME 1, SUBUNIT OF RNA POLYMERASE III TRANSCRIPTION INITIATION FACTOR IIIB                                           |
| 8553       | BHLHB2    | BHLHB2    | BASIC HELIX-LOOP-HELIX DOMAIN CONTAINING, CLASS B, 2                                                                           |
| 79365      | BHLHB3    | BHLHB3    | BASIC HELIX-LOOP-HELIX DOMAIN CONTAINING, CLASS B, 3                                                                           |
| 168620     | BHLHB8    | BHLHB8    | BASIC HELIX-LOOP-HELIX DOMAIN CONTAINING, CLASS B, 8                                                                           |
| 274        | BIN1      | BIN1      | BRIDGING INTEGRATOR 1                                                                                                          |
| 8548       | BLZF1     | BLZF1     | BASIC LEUCINE ZIPPER NUCLEAR FACTOR 1 (JEM-1)                                                                                  |
| 646        | BNC1      | BNC1      | BASONUCLIN 1                                                                                                                   |
| 51027      | BOLA1     | BOLA1     | BOLA-LIKE 1 (E. COLI)                                                                                                          |
| 552900     | BOLA2     | BOLA2     | BOLA-LIKE 2 (E. COLI)                                                                                                          |
| 672        | BRCA1     | BRCA1     | BREAST CANCER 1, EARLY ONSET                                                                                                   |
| 675        | BRCA2     | BRCA2     | BREAST CANCER 2, EARLY ONSET                                                                                                   |
| 23774      | BRD1      | BRD1      | BROMODOMAIN CONTAINING 1                                                                                                       |
| 29117      | BRD7      | BRD7      | BROMODOMAIN CONTAINING 7                                                                                                       |
| 10902      | BRD8      | BRD8      | BROMODOMAIN CONTAINING 8                                                                                                       |
| 676        | BRDT      | BRDT      | BROMODOMAIN, TESTIS-SPECIFIC                                                                                                   |
| 2972       | BRF1      | BRF1      | BRF1 HOMOLOG, SUBUNIT OF RNA POLYMERASE III TRANSCRIPTION INITIATION FACTOR IIIB (S. CEREVISIAE)                               |
| 83990      | BRIP1     | BRIP1     | BRCA1 INTERACTING PROTEIN C-TERMINAL HELICASE 1                                                                                |

|        |           |           |                                                                                                        |
|--------|-----------|-----------|--------------------------------------------------------------------------------------------------------|
| 7862   | BRPF1     | BRPF1     | BROMODOMAIN AND PHD FINGER CONTAINING, 1                                                               |
| 27154  | BRPF3     | BRPF3     | BROMODOMAIN AND PHD FINGER CONTAINING, 3                                                               |
| 54014  | BRWD1     | BRWD1     | BROMODOMAIN AND WID REPEAT DOMAIN CONTAINING 1                                                         |
| 9044   | BTAF1     | BTAF1     | BTAF1 RNA POLYMERASE II B-TFIIID TRANSCRIPTION FACTOR-ASSOCIATED, 170KDA (MOT1 HOMOLOG, S. CEREVISIAE) |
| 121551 | BTBD11    | BTBD11    | BTB (POZ) DOMAIN CONTAINING 11                                                                         |
| 140685 | BTBD4     | BTBD4     | BTB (POZ) DOMAIN CONTAINING 4                                                                          |
| 689    | BTF3      | BTF3      | BASIC TRANSCRIPTION FACTOR 3                                                                           |
| 694    | BTG1      | BTG1      | B-CELL TRANSLOCATION GENE 1, ANTI-PROLIFERATIVE                                                        |
| 7832   | BTG2      | BTG2      | BTG FAMILY, MEMBER 2                                                                                   |
| 8896   | BUD31     | BUD31     | G10 PROTEIN                                                                                            |
| 9689   | BZW1      | BZW1      | BASIC LEUCINE ZIPPER AND W2 DOMAINS 1                                                                  |
| 55320  | C14orf106 | C14ORF106 | PUTATIVE PROTEIN P243 WHICH INTERACTS WITH TRANSCRIPTION FACTOR SP1                                    |
| 10438  | C1D       | C1D       | NUCLEAR DNA-BINDING PROTEIN                                                                            |
| 127428 | C1orf83   | C1ORF83   | CHROMOSOME 1 OPEN READING FRAME 83                                                                     |
| 140893 | C20orf151 | C20ORF151 | CHROMOSOME 20 OPEN READING FRAME 151                                                                   |
| 56911  | C21orf7   | C21ORF7   | CHROMOSOME 21 OPEN READING FRAME 7                                                                     |
| 6936   | C2orf3    | C2ORF3    | CHROMOSOME 2 OPEN READING FRAME 3                                                                      |
| 57658  | CALCOCO1  | CALCOCO1  | CALCIUM BINDING AND COILED-COIL DOMAIN 1                                                               |
| 8092   | CART1     | CART1     | CARTILAGE PAIRED-CLASS HOMEOPROTEIN 1                                                                  |
| 54897  | CASZ1     | CASZ1     | CASTOR HOMOLOG 1, ZINC FINGER (DROSOPHILA)                                                             |
| 9139   | CBFA2T2   | CBFA2T2   | CORE-BINDING FACTOR, RUNT DOMAIN, ALPHA SUBUNIT 2; TRANSLOCATED TO, 2                                  |
| 863    | CBFA2T3   | CBFA2T3   | CORE-BINDING FACTOR, RUNT DOMAIN, ALPHA SUBUNIT 2; TRANSLOCATED TO, 3                                  |
| 895    | CBF3      | CBF3      | CORE-BINDING FACTOR, BETA SUBUNIT                                                                      |
| 11335  | CBX3      | CBX3      | CHROMOBOX HOMOLOG 3 (HP1 GAMMA HOMOLOG, DROSOPHILA)                                                    |
| 8535   | CBX4      | CBX4      | CHROMOBOX HOMOLOG 4 (PC CLASS HOMOLOG, DROSOPHILA)                                                     |
| 23466  | CBX6      | CBX6      | CHROMOBOX HOMOLOG 6                                                                                    |
| 23492  | CBX7      | CBX7      | CHROMOBOX HOMOLOG 7                                                                                    |
| 57332  | CBX8      | CBX8      | CHROMOBOX HOMOLOG 8 (PC CLASS HOMOLOG, DROSOPHILA)                                                     |
| 25819  | CCRN4L    | CCRN4L    | CCR4 CARBON CATABOLITE REPRESSION 4-LIKE (S. CEREVISIAE)                                               |
| 988    | CDC5L     | CDC5L     | CDC5 CELL DIVISION CYCLE 5-LIKE (S. POMBE)                                                             |
| 1044   | CDX1      | CDX1      | CAUDAL TYPE HOMEBOX TRANSCRIPTION FACTOR 1                                                             |
| 1045   | CDX2      | CDX2      | CAUDAL TYPE HOMEBOX TRANSCRIPTION FACTOR 2                                                             |
| 1046   | CDX4      | CDX4      | CAUDAL TYPE HOMEBOX TRANSCRIPTION FACTOR 4                                                             |
| 1050   | CEBPA     | CEBPA     | CCAAT/ENHANCER BINDING PROTEIN (C/EBP), ALPHA                                                          |
| 1051   | CEBPB     | CEBPB     | CCAAT/ENHANCER BINDING PROTEIN (C/EBP), BETA                                                           |
| 1052   | CEBPD     | CEBPD     | CCAAT/ENHANCER BINDING PROTEIN (C/EBP), DELTA                                                          |
| 1053   | CEBPE     | CEBPE     | CCAAT/ENHANCER BINDING PROTEIN (C/EBP), EPSILON                                                        |
| 1054   | CEBPG     | CEBPG     | CCAAT/ENHANCER BINDING PROTEIN (C/EBP), GAMMA                                                          |
| 10153  | CEBPZ     | CEBPZ     | CCAAT/ENHANCER BINDING PROTEIN ZETA                                                                    |
| 1059   | CENPB     | CENPB     | CENTROMERE PROTEIN B, 80KDA                                                                            |
| 116988 | CENTG3    | CENTG3    | CENTAURIN, GAMMA 3                                                                                     |
| 11064  | CEP110    | CEP110    | CENTROSOMAL PROTEIN 110KDA                                                                             |
| 10036  | CHAF1A    | CHAF1A    | CHROMATIN ASSEMBLY FACTOR 1, SUBUNIT A (P150)                                                          |
| 1105   | CHD1      | CHD1      | CHROMODOMAIN HELICASE DNA BINDING PROTEIN 1                                                            |
| 1106   | CHD2      | CHD2      | CHROMODOMAIN HELICASE DNA BINDING PROTEIN 2                                                            |
| 1108   | CHD4      | CHD4      | CHROMODOMAIN HELICASE DNA BINDING PROTEIN 4                                                            |
| 26038  | CHD5      | CHD5      | CHROMODOMAIN HELICASE DNA BINDING PROTEIN 5                                                            |
| 55636  | CHD7      | CHD7      | CHROMODOMAIN HELICASE DNA BINDING PROTEIN 7                                                            |
| 57680  | CHD8      | CHD8      | CHROMODOMAIN HELICASE DNA BINDING PROTEIN 8                                                            |
| 1112   | CHES1     | CHES1     | CHECKPOINT SUPPRESSOR 1                                                                                |
| 91612  | CHURC1    | CHURC1    | CHURCHILL DOMAIN CONTAINING 1                                                                          |
| 338917 | CHX10     | CHX10     | CEH-10 HOMEOBOX DOMAIN CONTAINING HOMOLOG (C. ELEGANS)                                                 |
| 23152  | CIC       | CIC       | CAPICUA HOMOLOG (DROSOPHILA)                                                                           |
| 4261   | CITA      | CITA      | CLASS II MAJOR HISTOCOMPATIBILITY COMPLEX, TRANSACTIVATOR                                              |
| 4435   | CITED1    | CITED1    | CBP/P300-INTERACTING TRANSACTIVATOR, WITH GLU/ASP-RICH CARBOXY-TERMINAL DOMAIN, 1                      |
| 10370  | CITED2    | CITED2    | CBP/P300-INTERACTING TRANSACTIVATOR, WITH GLU/ASP-RICH CARBOXY-TERMINAL DOMAIN, 2                      |
| 163732 | CITED4    | CITED4    | CBP/P300-INTERACTING TRANSACTIVATOR, WITH GLU/ASP-RICH CARBOXY-TERMINAL DOMAIN, 4                      |
| 9575   | CLOCK     | CLOCK     | CLOCK HOMOLOG (MOUSE)                                                                                  |
| 4848   | CNOT2     | CNOT2     | CCR4-NOT TRANSCRIPTION COMPLEX, SUBUNIT 2                                                              |
| 4849   | CNOT3     | CNOT3     | CCR4-NOT TRANSCRIPTION COMPLEX, SUBUNIT 3                                                              |
| 4850   | CNOT4     | CNOT4     | CCR4-NOT TRANSCRIPTION COMPLEX, SUBUNIT 4                                                              |
| 57472  | CNOT6     | CNOT6     | CCR4-NOT TRANSCRIPTION COMPLEX, SUBUNIT 6                                                              |
| 246175 | CNOT6L    | CNOT6L    | CCR4-NOT TRANSCRIPTION COMPLEX, subunit 6-like                                                         |
| 29883  | CNOT7     | CNOT7     | CCR4-NOT TRANSCRIPTION COMPLEX, SUBUNIT 7                                                              |
| 9337   | CNOT8     | CNOT8     | CCR4-NOT TRANSCRIPTION COMPLEX, SUBUNIT 8                                                              |
| 25920  | COBRA1    | COBRA1    | COFACTOR OF BRCA1                                                                                      |
| 8161   | COIL      | COIL      | COILIN                                                                                                 |
| 9318   | COP2      | COP2      | COP9 CONSTITUTIVE PHOTOMORPHOGENIC HOMOLOG SUBUNIT 2 (ARABIDOPSIS)                                     |
| 10987  | COP5      | COP5      | COP9 CONSTITUTIVE PHOTOMORPHOGENIC HOMOLOG SUBUNIT 5 (ARABIDOPSIS)                                     |
| 1382   | CRABP2    | CRABP2    | CELLULAR RETINOIC ACID BINDING PROTEIN 2                                                               |
| 57585  | CRAMP1L   | CRAMP1L   | CRM, CRAMPED-LIKE (DROSOPHILA)                                                                         |
| 1385   | CREB1     | CREB1     | CAMP RESPONSIVE ELEMENT BINDING PROTEIN 1                                                              |
| 10488  | CREB3     | CREB3     | CAMP RESPONSIVE ELEMENT BINDING PROTEIN 3                                                              |
| 90993  | CREB3L1   | CREB3L1   | CAMP RESPONSIVE ELEMENT BINDING PROTEIN 3-LIKE 1                                                       |
| 84699  | CREB3L3   | CREB3L3   | CAMP RESPONSIVE ELEMENT BINDING PROTEIN 3-LIKE 3                                                       |
| 148327 | CREB3L4   | CREB3L4   | CAMP RESPONSIVE ELEMENT BINDING PROTEIN 3-LIKE 4                                                       |
| 9586   | CREB5     | CREB5     | CAMP RESPONSIVE ELEMENT BINDING PROTEIN 5                                                              |
| 1387   | CREBBP    | CREBBP    | CREB BINDING PROTEIN (RUBINSTEIN-TAYBI SYNDROME)                                                       |
| 1388   | CREBL1    | CREBL1    | CAMP RESPONSIVE ELEMENT BINDING PROTEIN-LIKE 1                                                         |
| 1389   | CREBL2    | CREBL2    | CAMP RESPONSIVE ELEMENT BINDING PROTEIN-LIKE 2                                                         |
| 8804   | CREG1     | CREG1     | CELLULAR REPRESSOR OF E1A-STIMULATED GENES 1                                                           |
| 1390   | CREM      | CREM      | CAMP RESPONSIVE ELEMENT MODULATOR                                                                      |
| 9282   | CRSP2     | CRSP2     | COFACTOR REQUIRED FOR SP1 TRANSCRIPTIONAL ACTIVATION, SUBUNIT 2, 150KDA                                |
| 9439   | CRSP3     | CRSP3     | COFACTOR REQUIRED FOR SP1 TRANSCRIPTIONAL ACTIVATION, SUBUNIT 3, 130KDA                                |
| 9440   | CRSP6     | CRSP6     | COFACTOR REQUIRED FOR SP1 TRANSCRIPTIONAL ACTIVATION, SUBUNIT 6, 77KDA                                 |
| 9441   | CRSP7     | CRSP7     | COFACTOR REQUIRED FOR SP1 TRANSCRIPTIONAL ACTIVATION, SUBUNIT 7, 70KDA                                 |
| 9442   | CRSP8     | CRSP8     | COFACTOR REQUIRED FOR SP1 TRANSCRIPTIONAL ACTIVATION, SUBUNIT 8, 34KDA                                 |
| 9443   | CRSP9     | CRSP9     | COFACTOR REQUIRED FOR SP1 TRANSCRIPTIONAL ACTIVATION, SUBUNIT 9, 33KDA                                 |
| 23373  | CRTC1     | CRTC1     | CREB REGULATED TRANSCRIPTION COACTIVATOR 1                                                             |
| 1407   | CRY1      | CRY1      | CRYPTOCHROME 1 (PHOTOLYASE-LIKE)                                                                       |
| 8531   | CSDA      | CSDA      | COLD SHOCK DOMAIN PROTEIN A                                                                            |
| 27254  | CSDC2     | CSDC2     | COLD SHOCK DOMAIN CONTAINING C2, RNA BINDING                                                           |
| 7812   | CSDE1     | CSDE1     | COLD SHOCK DOMAIN CONTAINING E1, RNA-BINDING                                                           |
| 1466   | CSR2      | CSR2      | CYSTEINE AND GLYCINE-RICH PROTEIN 2                                                                    |
| 8048   | CSR3      | CSR3      | CYSTEINE AND GLYCINE-RICH PROTEIN 3 (CARDIAC LIM PROTEIN)                                              |
| 1487   | CTBP1     | CTBP1     | C-TERMINAL BINDING PROTEIN 1                                                                           |
| 10664  | CTCF      | CTCF      | CCCTC-BINDING FACTOR (ZINC FINGER PROTEIN)                                                             |
| 140690 | CTCFL     | CTCFL     | CCCTC-BINDING FACTOR (ZINC FINGER PROTEIN)-LIKE                                                        |
| 9150   | CTDP1     | CTDP1     | CTD (CARBOXY-TERMINAL DOMAIN, RNA POLYMERASE II, POLYPEPTIDE A) PHOSPHATASE, SUBUNIT 1                 |
| 10217  | CTDSPL    | CTDSPL    | CTD (CARBOXY-TERMINAL DOMAIN, RNA POLYMERASE II, POLYPEPTIDE A) SMALL PHOSPHATASE-LIKE                 |
| 1489   | CTNBB1    | CTNBB1    | CATENIN (CAHERIN-ASSOCIATED PROTEIN), BETA 1, 88KDA                                                    |
| 56988  | CTNBNIP1  | CTNBNIP1  | CATENIN, BETA INTERACTING PROTEIN 1                                                                    |
| 56259  | CTNBL1    | CTNBL1    | CATENIN, BETA LIKE 1                                                                                   |
| 1523   | CUTL1     | CUTL1     | CUT-LIKE 1, CCAAT DISPLACEMENT PROTEIN (DROSOPHILA)                                                    |
| 23316  | CUTL2     | CUTL2     | CUT-LIKE 2 (DROSOPHILA)                                                                                |
| 30827  | CXXC1     | CXXC1     | CXXC FINGER 1 (PHD DOMAIN)                                                                             |
| 1601   | DAB2      | DAB2      | DISABLED HOMOLOG 2, MITOGEN-RESPONSIVE PHOSPHOPROTEIN (DROSOPHILA)                                     |
| 1602   | DACH1     | DACH1     | DACHSHUND HOMOLOG 1 (DROSOPHILA)                                                                       |
| 117154 | DACH2     | DACH2     | DACHSHUND HOMOLOG 2 (DROSOPHILA)                                                                       |
| 1616   | DAXX      | DAXX      | DEATH-ASSOCIATED PROTEIN 6                                                                             |
| 9802   | DAZAP2    | DAZAP2    | DAZ ASSOCIATED PROTEIN 2                                                                               |
| 1628   | DBP       | DBP       | D SITE OF ALBUMIN PROMOTER (ALBUMIN D-BOX) BINDING PROTEIN                                             |
| 55802  | DCP1A     | DCP1A     | DCP1 DECAPPING ENZYME HOMOLOG A (S. CEREVISIAE)                                                        |
| 1642   | DBB1      | DBB1      | DAMAGE-SPECIFIC DNA BINDING PROTEIN 1, 127KDA                                                          |
| 1643   | DBB2      | DBB2      | DAMAGE-SPECIFIC DNA BINDING PROTEIN 2, 48KDA                                                           |
| 1649   | DDIT3     | DDIT3     | DNA-DAMAGE-INDUCIBLE TRANSCRIPT 3                                                                      |
| 11218  | DDX20     | DDX20     | DEAD (ASP-GLU-ALA-ASP) BOX POLYPEPTIDE 20                                                              |
| 1655   | DDX5      | DDX5      | DEAD (ASP-GLU-ALA-ASP) BOX POLYPEPTIDE 5                                                               |
| 79039  | DDX54     | DDX54     | DEAD (ASP-GLU-ALA-ASP) BOX POLYPEPTIDE 54                                                              |
| 10522  | DEAF1     | DEAF1     | DEFORMED EPIDERMAL AUTOREGULATORY FACTOR 1 (DROSOPHILA)                                                |
| 9191   | DEAD      | DEAD      | DEATH EFFECTOR DOMAIN CONTAINING                                                                       |
| 62989  | DEDD2     | DEDD2     | DEATH EFFECTOR DOMAIN CONTAINING 2                                                                     |
| 7913   | DEK       | DEK       | DEK ONCOGENE (DNA BINDING)                                                                             |
| 10260  | DENND4A   | DENND4A   | DENN/MADD DOMAIN CONTAINING 4A                                                                         |
| 9785   | DHX38     | DHX38     | DEAH (ASP-GLU-ALA-HIS) BOX POLYPEPTIDE 38                                                              |
| 11083  | DIDO1     | DIDO1     | DEATH INDUCER-OBLITERATOR 1                                                                            |
| 22982  | DIP2C     | DIP2C     | DIP2 DISCO-INTERACTING PROTEIN 2 HOMOLOG C (DROSOPHILA)                                                |
| 1745   | DLX1      | DLX1      | DISTAL-LESS HOMEBOX 1                                                                                  |
| 1746   | DLX2      | DLX2      | DISTAL-LESS HOMEBOX 2                                                                                  |

|        |              |          |                                                                                                                                |
|--------|--------------|----------|--------------------------------------------------------------------------------------------------------------------------------|
| 1747   | DLX3         | DLX3     | DISTAL-LESS HOMEBOX 3                                                                                                          |
| 1748   | DLX4         | DLX4     | DISTAL-LESS HOMEBOX 4                                                                                                          |
| 1749   | DLX5         | DLX5     | DISTAL-LESS HOMEBOX 5                                                                                                          |
| 1750   | DLX6         | DLX6     | DISTAL-LESS HOMEBOX 6                                                                                                          |
| 55929  | DMAPI        | DMAPI    | DNA METHYLTRANSFERASE 1 ASSOCIATED PROTEIN 1                                                                                   |
| 127343 | DMBX1        | DMBX1    | DIENCEPHALON/MESENCEPHALON HOMEBOX 1                                                                                           |
| 1761   | DMRT1        | DMRT1    | DOUBLESEX AND MAB-3 RELATED TRANSCRIPTION FACTOR 1                                                                             |
| 10655  | DMRT2        | DMRT2    | DOUBLESEX AND MAB-3 RELATED TRANSCRIPTION FACTOR 2                                                                             |
| 58524  | DMRT3        | DMRT3    | DOUBLESEX AND MAB-3 RELATED TRANSCRIPTION FACTOR 3                                                                             |
| 63951  | DMRTA1       | DMRTA1   | DMRT-LIKE FAMILY A1                                                                                                            |
| 63948  | DMRTB1       | DMRTB1   | DMRT-LIKE FAMILY B WITH PROLINE-RICH C-TERMINAL, 1                                                                             |
| 63946  | DMRTC2       | DMRTC2   | DMRT-LIKE FAMILY C2                                                                                                            |
| 9989   | DMTF1        | DMTF1    | CYCLIN D BINDING MYB-LIKE TRANSCRIPTION FACTOR 1                                                                               |
| 1788   | DNMT1        | DNMT1    | DNA (CYTOSINE-5-)-METHYLTRANSFERASE 1                                                                                          |
| 1788   | DNMT3A       | DNMT3A   | DNA (CYTOSINE-5-)-METHYLTRANSFERASE 3 ALPHA                                                                                    |
| 29947  | DNMT3L       | DNMT3L   | DNA (CYTOSINE-5-)-METHYLTRANSFERASE 3-LIKE                                                                                     |
| 84444  | DOT1L        | DOT1L    | DOT1-LIKE, HISTONE H3 METHYLTRANSFERASE (S. CEREVISIAE)                                                                        |
| 8193   | DPF1         | DPF1     | D4, ZINC AND DOUBLE PHD FINGERS FAMILY 1                                                                                       |
| 5977   | DPF2         | DPF2     | D4, ZINC AND DOUBLE PHD FINGERS FAMILY 2                                                                                       |
| 8110   | DPF3         | DPF3     | D4, ZINC AND DOUBLE PHD FINGERS, FAMILY 3                                                                                      |
| 1810   | DR1          | DR1      | DOWN-REGULATOR OF TRANSCRIPTION 1, TBP-BINDING (NEGATIVE COFACTOR 2)                                                           |
| 10589  | DRAP1        | DRAP1    | DR1-ASSOCIATED PROTEIN 1 (NEGATIVE COFACTOR 2 ALPHA)                                                                           |
| 1840   | DTX1         | DTX1     | DELTEX HOMOLOG 1 (DROSOPHILA)                                                                                                  |
| 26582  | DUX3         | DUX3     | DOUBLE HOMEBOX, 3                                                                                                              |
| 22947  | DUX4         | DUX4     | DOUBLE HOMEBOX, 4                                                                                                              |
| 1869   | E2F1         | E2F1     | E2F TRANSCRIPTION FACTOR 1                                                                                                     |
| 1870   | E2F2         | E2F2     | E2F TRANSCRIPTION FACTOR 2                                                                                                     |
| 1871   | E2F3         | E2F3     | E2F TRANSCRIPTION FACTOR 3                                                                                                     |
| 1874   | E2F4         | E2F4     | E2F TRANSCRIPTION FACTOR 4, P107/P130-BINDING                                                                                  |
| 1875   | E2F5         | E2F5     | E2F TRANSCRIPTION FACTOR 5, P130-BINDING                                                                                       |
| 1876   | E2F6         | E2F6     | E2F TRANSCRIPTION FACTOR 6                                                                                                     |
| 79733  | E2F8         | E2F8     | E2F TRANSCRIPTION FACTOR 8                                                                                                     |
| 1877   | E4F1         | E4F1     | E4F TRANSCRIPTION FACTOR 1                                                                                                     |
| 85403  | EF1          | EF1      | ELL ASSOCIATED FACTOR 1                                                                                                        |
| 1879   | EBF          | EBF      | EARLY B-CELL FACTOR                                                                                                            |
| 64641  | EBF2         | EBF2     | EARLY B-CELL FACTOR 2                                                                                                          |
| 253738 | EBF3         | EBF3     | EARLY B-CELL FACTOR 3                                                                                                          |
| 57593  | RP5-860F19.3 | EBF4     | early B-cell factor 4                                                                                                          |
| 11319  | ECD          | ECD      | EGDYSONELESS HOMOLOG (DROSOPHILA)                                                                                              |
| 8721   | EDF1         | EDF1     | ENDOTHELIAL DIFFERENTIATION-RELATED FACTOR 1                                                                                   |
| 8726   | EED          | EED      | EMBRYONIC ECTODERM DEVELOPMENT                                                                                                 |
| 1915   | EEF1A1       | EEF1A1   | EUKARYOTIC TRANSLATION ELONGATION FACTOR 1 ALPHA 1                                                                             |
| 1958   | EGR1         | EGR1     | EARLY GROWTH RESPONSE 1                                                                                                        |
| 1959   | EGR2         | EGR2     | EARLY GROWTH RESPONSE 2 (KROX-20 HOMOLOG, DROSOPHILA)                                                                          |
| 1960   | EGR3         | EGR3     | EARLY GROWTH RESPONSE 3                                                                                                        |
| 1961   | EGR4         | EGR4     | EARLY GROWTH RESPONSE 4                                                                                                        |
| 26298  | EHF          | EHF      | ETS HOMOLOGOUS FACTOR                                                                                                          |
| 79813  | EHMT1        | EHMT1    | EUCHROMATIC HISTONE-LYSINE N-METHYLTRANSFERASE 1                                                                               |
| 10919  | EHMT2        | EHMT2    | EUCHROMATIC HISTONE-LYSINE N-METHYLTRANSFERASE 2                                                                               |
| 5610   | EIF2AK2      | EIF2AK2  | EUKARYOTIC TRANSLATION INITIATION FACTOR 2-ALPHA KINASE 2                                                                      |
| 9669   | EIF5B        | EIF5B    | EUKARYOTIC TRANSLATION INITIATION FACTOR 5B                                                                                    |
| 1993   | ELAVL2       | ELAVL2   | ELAV (EMBRYONIC LETHAL, ABNORMAL VISION, DROSOPHILA)-LIKE 2 (HU ANTIGEN B)                                                     |
| 1997   | ELF1         | ELF1     | E74-LIKE FACTOR 1 (ETS DOMAIN TRANSCRIPTION FACTOR)                                                                            |
| 1998   | ELF2         | ELF2     | E74-LIKE FACTOR 2 (ETS DOMAIN TRANSCRIPTION FACTOR)                                                                            |
| 1999   | ELF3         | ELF3     | E74-LIKE FACTOR 3 (ETS DOMAIN TRANSCRIPTION FACTOR, EPITHELIAL-SPECIFIC )                                                      |
| 2000   | ELF4         | ELF4     | E74-LIKE FACTOR 4 (ETS DOMAIN TRANSCRIPTION FACTOR)                                                                            |
| 2001   | ELF5         | ELF5     | E74-LIKE FACTOR 5 (ETS DOMAIN TRANSCRIPTION FACTOR)                                                                            |
| 2002   | ELK1         | ELK1     | ELK1, MEMBER OF ETS ONCOGENE FAMILY                                                                                            |
| 2004   | ELK3         | ELK3     | ELK3, ETS-DOMAIN PROTEIN (SRF ACCESSORY PROTEIN 2)                                                                             |
| 2005   | ELK4         | ELK4     | ELK4, ETS-DOMAIN PROTEIN (SRF ACCESSORY PROTEIN 1)                                                                             |
| 8178   | ELL          | ELL      | ELONGATION FACTOR RNA POLYMERASE II                                                                                            |
| 22936  | ELL2         | ELL2     | ELONGATION FACTOR, RNA POLYMERASE II, 2                                                                                        |
| 80237  | ELL3         | ELL3     | ELONGATION FACTOR RNA POLYMERASE II-LIKE 3                                                                                     |
| 2016   | EMX1         | EMX1     | EMPTY SPIRACLES HOMOLOG 1 (DROSOPHILA)                                                                                         |
| 2018   | EMX2         | EMX2     | EMPTY SPIRACLES HOMOLOG 2 (DROSOPHILA)                                                                                         |
| 2019   | EN1          | EN1      | ENGRAILED HOMOLOG 1                                                                                                            |
| 2020   | EN2          | EN2      | ENGRAILED HOMOLOG 2                                                                                                            |
| 2023   | ENO1         | ENO1     | ENOLASE 1, (ALPHA)                                                                                                             |
| 8320   | EOMES        | EOMES    | EOMESODERMIN HOMOLOG (XENOPUS LAEVIS)                                                                                          |
| 2033   | EP300        | EP300    | E1A BINDING PROTEIN P300                                                                                                       |
| 75634  | EP400        | EP400    | TRINUCLEOTIDE REPEAT CONTAINING 12                                                                                             |
| 2034   | EPC1         | EPC1     | ENDOTHELIAL PAS DOMAIN PROTEIN 1                                                                                               |
| 80314  | EPC1         | EPC1     | ENHANCER OF POLYCOMB HOMOLOG 1 (DROSOPHILA)                                                                                    |
| 2068   | ERCC2        | ERCC2    | EXCISION REPAIR CROSS-COMPLEMENTING RODENT REPAIR DEFICIENCY, COMPLEMENTATION GROUP 2 (XERODERMA PIGMENTOSUM D)                |
| 2071   | ERCC3        | ERCC3    | EXCISION REPAIR CROSS-COMPLEMENTING RODENT REPAIR DEFICIENCY, COMPLEMENTATION GROUP 3 (XERODERMA PIGMENTOSUM GROUP B COMPLEMEN |
| 1161   | ERCC8        | ERCC8    | EXCISION REPAIR CROSS-COMPLEMENTING RODENT REPAIR DEFICIENCY, COMPLEMENTATION GROUP 8                                          |
| 2077   | ERF          | ERF      | ETS2 REPRESSOR FACTOR                                                                                                          |
| 2078   | ERG          | ERG      | V-ETS ERYTHROBLASTOSIS VIRUS E26 ONCOGENE LIKE (AVIAN)                                                                         |
| 9700   | ESPL1        | ESPL1    | EXTRA SPINDLE POLES LIKE 1 (S. CEREVISIAE)                                                                                     |
| 2099   | ESR1         | ESR1     | ESTROGEN RECEPTOR 1                                                                                                            |
| 2100   | ESR2         | ESR2     | ESTROGEN RECEPTOR 2 (ER BETA)                                                                                                  |
| 2101   | ESRRA        | ESRRA    | ESTROGEN-RELATED RECEPTOR ALPHA                                                                                                |
| 2103   | ESRRB        | ESRRB    | ESTROGEN-RELATED RECEPTOR BETA                                                                                                 |
| 2104   | ESRRG        | ESRRG    | ESTROGEN-RELATED RECEPTOR GAMMA                                                                                                |
| 80712  | ESX1         | ESX1     | EXTRAEMBRYONIC, SPERMATOGENESIS, HOMEBOX 1 HOMOLOG (MOUSE)                                                                     |
| 2113   | ETS1         | ETS1     | V-ETS ERYTHROBLASTOSIS VIRUS E26 ONCOGENE HOMOLOG 1 (AVIAN)                                                                    |
| 2114   | ETS2         | ETS2     | V-ETS ERYTHROBLASTOSIS VIRUS E26 ONCOGENE HOMOLOG 2 (AVIAN)                                                                    |
| 2115   | ETV1         | ETV1     | ETS VARIANT GENE 1                                                                                                             |
| 2116   | ETV2         | ETV2     | ETS VARIANT GENE 2                                                                                                             |
| 2117   | ETV3         | ETV3     | ETS VARIANT GENE 3                                                                                                             |
| 2118   | ETV4         | ETV4     | ETS VARIANT GENE 4 (E1A ENHANCER BINDING PROTEIN, E1AF)                                                                        |
| 2119   | ETV5         | ETV5     | ETS VARIANT GENE 5 (ETS-RELATED MOLECULE)                                                                                      |
| 2120   | ETV6         | ETV6     | ETS VARIANT GENE 6 (TEL ONCOGENE)                                                                                              |
| 51513  | ETV7         | ETV7     | ETS TRANSCRIPTION FACTOR TEL-2B                                                                                                |
| 2122   | EV1          | EV1      | ECOTROPIC VIRAL INTEGRATION SITE 1                                                                                             |
| 4197   | MDS1         | MDS1     | myelodysplasia syndrome 1                                                                                                      |
| 2128   | EVX1         | EVX1     | EVE, EVEN-SKIPPED HOMEBOX HOMOLOG 1 (DROSOPHILA)                                                                               |
| 2130   | EWSR1        | EWSR1    | EWING SARCOMA BREAKPOINT REGION 1                                                                                              |
| 2139   | EYA2         | EYA2     | EYES ABSENT HOMOLOG 2 (DROSOPHILA)                                                                                             |
| 2140   | EYA3         | EYA3     | EYES ABSENT HOMOLOG 3 (DROSOPHILA)                                                                                             |
| 2070   | EYA4         | EYA4     | EYES ABSENT HOMOLOG 4 (DROSOPHILA)                                                                                             |
| 2145   | EZH1         | EZH1     | ENHANCER OF ZESTE HOMOLOG 1 (DROSOPHILA)                                                                                       |
| 2146   | EZH2         | EZH2     | ENHANCER OF ZESTE HOMOLOG 2 (DROSOPHILA)                                                                                       |
| 9214   | FAIM3        | FAIM3    | FAS APOPTOTIC INHIBITORY MOLECULE 3                                                                                            |
| 2186   | FALZ         | FALZ     | FETAL ALZHEIMER ANTIGEN                                                                                                        |
| 92565  | FANK1        | FANK1    | FIBRONECTIN TYPE III AND ANKYRIN REPEAT DOMAINS 1                                                                              |
| 84678  | FBXL10       | FBXL10   | F-BOX AND LEUCINE-RICH REPEAT PROTEIN 10                                                                                       |
| 22992  | FBXL11       | FBXL11   | F-BOX AND LEUCINE-RICH REPEAT PROTEIN 11                                                                                       |
| 54620  | FBXL19       | FBXL19   | F-BOX AND LEUCINE-RICH REPEAT PROTEIN 19                                                                                       |
| 25793  | FBX07        | FBX07    | F-BOX PROTEIN 7                                                                                                                |
| 54738  | FEV          | FEV      | FEV (ETS ONCOGENE FAMILY)                                                                                                      |
| 2274   | FHL2         | FHL2     | FOUR AND A HALF LIM DOMAINS 2                                                                                                  |
| 9457   | FHL5         | FHL5     | FOUR AND A HALF LIM DOMAINS 5                                                                                                  |
| 344018 | FIGLA        | FIGLA    | FACTOR IN THE GERMLINE ALPHA                                                                                                   |
| 84922  | FLJ14768     | FIZ1     | FLT3-interacting zinc finger 1                                                                                                 |
| 2307   | FKHL18       | FKHL18   | FORKHEAD-LIKE 18 (DROSOPHILA)                                                                                                  |
| 64105  | FKSG14       | FKSG14   | LEUCINE ZIPPER PROTEIN FKSG14                                                                                                  |
| 2313   | FLI1         | FLI1     | FRIEND LEUKEMIA VIRUS INTEGRATION 1                                                                                            |
| 79998  | ANKRD53      | FLJ12056 | HYPOTHETICAL PROTEIN FLJ12056                                                                                                  |
| 2332   | FMR1         | FMR1     | FRAGILE X MENTAL RETARDATION 1                                                                                                 |
| 2353   | FOSB         | FOSB     | V-FOS B1 MURINE OSTEOSARCOMA VIRAL ONCOGENE HOMOLOG                                                                            |
| 2354   | FOSB         | FOSB     | FBJ MURINE OSTEOSARCOMA VIRAL ONCOGENE HOMOLOG B                                                                               |
| 8061   | FOSL1        | FOSL1    | FOS-LIKE ANTIGEN 1                                                                                                             |
| 2355   | FOSL2        | FOSL2    | FOS-LIKE ANTIGEN 2                                                                                                             |
| 3169   | FOXA1        | FOXA1    | FORKHEAD BOX A1                                                                                                                |
| 3170   | FOXA2        | FOXA2    | FORKHEAD BOX A2                                                                                                                |
| 3171   | FOXA3        | FOXA3    | FORKHEAD BOX A3                                                                                                                |
| 27023  | FOXB1        | FOXB1    | FORKHEAD BOX B1                                                                                                                |
| 2296   | FOXC1        | FOXC1    | FORKHEAD BOX C1                                                                                                                |

|        |           |          |                                                                                   |
|--------|-----------|----------|-----------------------------------------------------------------------------------|
| 2303   | FOXC2     | FOXC2    | FORKHEAD BOX C2 (MFH-1, MESENCHYME FORKHEAD 1)                                    |
| 2297   | FOX1      | FOX1     | FORKHEAD BOX D1                                                                   |
| 2306   | FOX2      | FOX2     | FORKHEAD BOX D2                                                                   |
| 27022  | FOX3      | FOX3     | FORKHEAD BOX D3                                                                   |
| 2298   | FOX4      | FOX4     | FORKHEAD BOX D4                                                                   |
| 200350 | FOX4L1    | FOX4L1   | FORKHEAD BOX D4-LIKE 1                                                            |
| 34934  | FOX4L4    | FOX4L4   | FORKHEAD BOX D4-LIKE 4                                                            |
| 2304   | FOX1      | FOX1     | FORKHEAD BOX E1 (THYROID TRANSCRIPTION FACTOR 2)                                  |
| 2301   | FOX3      | FOX3     | FORKHEAD BOX E3                                                                   |
| 2294   | FOX1      | FOX1     | FORKHEAD BOX F1                                                                   |
| 2295   | FOX2      | FOX2     | FORKHEAD BOX F2                                                                   |
| 2291   | FOX1A     | FOX1A    | FORKHEAD BOX G1A                                                                  |
| 2290   | FOX1B     | FOX1B    | FORKHEAD BOX G1B                                                                  |
| 2292   | FOX1C     | FOX1C    | FORKHEAD BOX G1C                                                                  |
| 8928   | FOX1      | FOX1     | FORKHEAD BOX H1                                                                   |
| 2299   | FOX1      | FOX1     | FORKHEAD BOX I1                                                                   |
| 2302   | FOX1      | FOX1     | FORKHEAD BOX J1                                                                   |
| 55810  | FOX2      | FOX2     | FORKHEAD BOX J2                                                                   |
| 22887  | FOX3      | FOX3     | FORKHEAD BOX J3                                                                   |
| 3607   | FOX2      | FOX2     | FORKHEAD BOX K2                                                                   |
| 2300   | FOX1      | FOX1     | FORKHEAD BOX L1                                                                   |
| 668    | FOX2      | FOX2     | FORKHEAD BOX L2                                                                   |
| 2305   | FOX1      | FOX1     | FORKHEAD BOX M1                                                                   |
| 8456   | FOX1      | FOX1     | FORKHEAD BOX N1                                                                   |
| 121643 | FOX4      | FOX4     | FORKHEAD BOX N4                                                                   |
| 2308   | FOX1A     | FOX1A    | FORKHEAD BOX O1A (RHABDOMYOSARCOMA)                                               |
| 2309   | FOX3A     | FOX3A    | FORKHEAD BOX O3A                                                                  |
| 27086  | FOX1      | FOX1     | FORKHEAD BOX P1                                                                   |
| 93986  | FOX2      | FOX2     | TRINUCLEOTIDE REPEAT CONTAINING 10                                                |
| 50943  | FOX3      | FOX3     | FORKHEAD BOX P3                                                                   |
| 116113 | FOX4      | FOX4     | FORKHEAD BOX P4                                                                   |
| 94234  | FOX1      | FOX1     | FORKHEAD BOX Q1                                                                   |
| 8880   | FUB1      | FUB1     | FAR UPSTREAM ELEMENT (FUSE) BINDING PROTEIN 1                                     |
| 8939   | FUB3      | FUB3     | FAR UPSTREAM ELEMENT (FUSE) BINDING PROTEIN 3                                     |
| 2521   | FUS       | FUS      | FUSION (INVOLVED IN T(12;16) IN MALIGNANT LIPOSARCOMA)                            |
| 10772  | FUSIP1    | FUSIP1   | FUS INTERACTING PROTEIN (SERINE/ARGININE-RICH) 1                                  |
| 8067   | FXR1      | FXR1     | FRAGILE X MENTAL RETARDATION, AUTOSOMAL HOMOLOG 1                                 |
| 9513   | FXR2      | FXR2     | FRAGILE X MENTAL RETARDATION, AUTOSOMAL HOMOLOG 2                                 |
| 2551   | GABPA     | GABPA    | GA BINDING PROTEIN TRANSCRIPTION FACTOR, ALPHA SUBUNIT 60KDA                      |
| 2553   | GABPB2    | GABPB2   | GA BINDING PROTEIN TRANSCRIPTION FACTOR, BETA SUBUNIT 1, 53KDA                    |
| 2623   | GATA1     | GATA1    | GATA BINDING PROTEIN 1 (GLOBIN TRANSCRIPTION FACTOR 1)                            |
| 2624   | GATA2     | GATA2    | GATA BINDING PROTEIN 2                                                            |
| 2625   | GATA3     | GATA3    | GATA BINDING PROTEIN 3                                                            |
| 2626   | GATA4     | GATA4    | GATA BINDING PROTEIN 4                                                            |
| 140828 | GATA5     | GATA5    | GATA BINDING PROTEIN 5                                                            |
| 2627   | GATA6     | GATA6    | GATA BINDING PROTEIN 6                                                            |
| 57798  | GATAD1    | GATAD1   | GATA ZINC FINGER DOMAIN CONTAINING 1                                              |
| 54815  | GATAD2A   | GATAD2A  | GATA ZINC FINGER DOMAIN CONTAINING 2A                                             |
| 57459  | GATAD2B   | GATAD2B  | GATA ZINC FINGER DOMAIN CONTAINING 2B                                             |
| 2637   | GBX2      | GBX2     | GASTRULATION BRAIN HOMEBOX 2                                                      |
| 94104  | C21orf66  | GCFC     | GC-RICH SEQUENCE DNA-BINDING FACTOR CANDIDATE                                     |
| 8521   | GCM1      | GCM1     | GLIAL CELLS MISSING HOMOLOG 1 (DROSOPHILA)                                        |
| 9247   | GCM2      | GCM2     | GLIAL CELLS MISSING HOMOLOG 2 (DROSOPHILA)                                        |
| 2672   | GF1       | GF1      | GROWTH FACTOR INDEPENDENT 1                                                       |
| 8328   | GF1B      | GF1B     | GROWTH FACTOR INDEPENDENT 1B (POTENTIAL REGULATOR OF CDKN1A, TRANSLOCATED IN CML) |
| 92283  | GIOT-1    | GIOT-1   | GONADOTROPIN INDUCIBLE TRANSCRIPTION REPRESSOR 1                                  |
| 2735   | GLI1      | GLI1     | GLIOMA-ASSOCIATED ONCOGENE HOMOLOG 1 (ZINC FINGER PROTEIN)                        |
| 2736   | GLI2      | GLI2     | GLI-KRUPPEL FAMILY MEMBER GLI2                                                    |
| 2737   | GLI3      | GLI3     | GLI-KRUPPEL FAMILY MEMBER GLI3 (GREIG CEPHALOPOLYSYNDACTYLY SYNDROME)             |
| 2738   | GLI4      | GLI4     | GLI-KRUPPEL FAMILY MEMBER GLI4                                                    |
| 148979 | GLIS1     | GLIS1    | GLIS FAMILY ZINC FINGER 1                                                         |
| 84662  | GLIS2     | GLIS2    | GLIS FAMILY ZINC FINGER 2                                                         |
| 169792 | GLIS3     | GLIS3    | GLIS FAMILY ZINC FINGER 3                                                         |
| 10691  | GMEB1     | GMEB1    | GLUCOCORTICOID MODULATORY ELEMENT BINDING PROTEIN 1                               |
| 26205  | GMEB2     | GMEB2    | GLUCOCORTICOID MODULATORY ELEMENT BINDING PROTEIN 2                               |
| 54856  | GON4L     | GON4L    | GON-4-LIKE (C.ELEGANS)                                                            |
| 29841  | GRHL1     | GRHL1    | GRAINYHEAD-LIKE 1 (DROSOPHILA)                                                    |
| 2909   | GRLF1     | GRLF1    | GLUCOCORTICOID RECEPTOR DNA BINDING FACTOR 1                                      |
| 145258 | GSC       | GSC      | GOOSECOID                                                                         |
| 2928   | GSOL      | GSOL     | GOOSECOID-LIKE                                                                    |
| 219409 | GSH1      | GSH1     | GS HOMEBOX 1                                                                      |
| 170825 | GSH2      | GSH2     | GS HOMEBOX 2                                                                      |
| 2957   | GTF2A1    | GTF2A1   | GENERAL TRANSCRIPTION FACTOR IIA, 1, 19/37KDA                                     |
| 2958   | GTF2A2    | GTF2A2   | GENERAL TRANSCRIPTION FACTOR IIA, 2, 12KDA                                        |
| 2959   | GTF2B     | GTF2B    | GENERAL TRANSCRIPTION FACTOR IIB                                                  |
| 2960   | GTF2E1    | GTF2E1   | GENERAL TRANSCRIPTION FACTOR IIE, POLYPEPTIDE 1, ALPHA 56KDA                      |
| 2961   | GTF2E2    | GTF2E2   | GENERAL TRANSCRIPTION FACTOR IIE, POLYPEPTIDE 2, BETA 34KDA                       |
| 2962   | GTF2F1    | GTF2F1   | GENERAL TRANSCRIPTION FACTOR IIF, POLYPEPTIDE 1, 74KDA                            |
| 2963   | GTF2F2    | GTF2F2   | GENERAL TRANSCRIPTION FACTOR IIF, POLYPEPTIDE 2, 30KDA                            |
| 2965   | GTF2H1    | GTF2H1   | GENERAL TRANSCRIPTION FACTOR IIH, POLYPEPTIDE 1, 62KDA                            |
| 2966   | GTF2H2    | GTF2H2   | GENERAL TRANSCRIPTION FACTOR IIH, POLYPEPTIDE 2, 44KDA                            |
| 2967   | GTF2H3    | GTF2H3   | GENERAL TRANSCRIPTION FACTOR IIH, POLYPEPTIDE 3, 34KDA                            |
| 2968   | GTF2H4    | GTF2H4   | GENERAL TRANSCRIPTION FACTOR IIH, POLYPEPTIDE 4, 52KDA                            |
| 2969   | GTF2I     | GTF2I    | GENERAL TRANSCRIPTION FACTOR II I                                                 |
| 9569   | GTF2IRD1  | GTF2IRD1 | GTF2I REPEAT DOMAIN CONTAINING 1                                                  |
| 2971   | GTF3A     | GTF3A    | GENERAL TRANSCRIPTION FACTOR IIIA                                                 |
| 2975   | GTF3C1    | GTF3C1   | GENERAL TRANSCRIPTION FACTOR IIIC, POLYPEPTIDE 1, ALPHA 220KDA                    |
| 2976   | GTF3C2    | GTF3C2   | GENERAL TRANSCRIPTION FACTOR IIIC, POLYPEPTIDE 2, BETA 110KDA                     |
| 9330   | GTF3C3    | GTF3C3   | GENERAL TRANSCRIPTION FACTOR IIIC, POLYPEPTIDE 3, 102KDA                          |
| 9329   | GTF3C4    | GTF3C4   | GENERAL TRANSCRIPTION FACTOR IIIC, POLYPEPTIDE 4, 90KDA                           |
| 9328   | GTF3C5    | GTF3C5   | GENERAL TRANSCRIPTION FACTOR IIIC, POLYPEPTIDE 5, 63KDA                           |
| 3005   | H1F0      | H1F0     | H1 HISTONE FAMILY, MEMBER 0                                                       |
| 8971   | H1FX      | H1FX     | H1 HISTONE FAMILY, MEMBER X                                                       |
| 8347   | HIST1H2BC | H3/O     | HISTONE 1, H2BD                                                                   |
| 3017   | HIST1H2BD | H3/O     | HISTONE 1, H2BD                                                                   |
| 8344   | HIST1H2BE | H3/O     | HISTONE 1, H2BD                                                                   |
| 8339   | HIST1H2BG | H3/O     | HISTONE 1, H2BD                                                                   |
| 22927  | HABP4     | HABP4    | HYALURONAN BINDING PROTEIN 4                                                      |
| 9421   | HAND1     | HAND1    | HEART AND NEURAL CREST DERIVATIVES EXPRESSED 1                                    |
| 9464   | HAND2     | HAND2    | HEART AND NEURAL CREST DERIVATIVES EXPRESSED 2                                    |
| 10456  | HAX1      | HAX1     | HCL S1 ASSOCIATED PROTEIN X-1                                                     |
| 26959  | HBP1      | HBP1     | HMG-BOX TRANSCRIPTION FACTOR 1                                                    |
| 51773  | HBXAP     | HBXAP    | HEPATITIS B VIRUS X ASSOCIATED PROTEIN                                            |
| 3054   | HCFC1     | HCFC1    | HOST CELL FACTOR C1 (VP16-ACCESSORY PROTEIN)                                      |
| 3059   | HCLS1     | HCLS1    | HEMATOPOIETIC CELL-SPECIFIC LYN SUBSTRATE 1                                       |
| 3064   | HD        | HD       | HUNTINGTIN (HUNTINGTON DISEASE)                                                   |
| 3065   | HDAC1     | HDAC1    | HISTONE DEACETYLASE 1                                                             |
| 83933  | HDAC10    | HDAC10   | HISTONE DEACETYLASE 10                                                            |
| 79885  | HDAC11    | HDAC11   | HISTONE DEACETYLASE 11                                                            |
| 3066   | HDAC2     | HDAC2    | HISTONE DEACETYLASE 2                                                             |
| 8841   | HDAC3     | HDAC3    | HISTONE DEACETYLASE 3                                                             |
| 9759   | HDAC4     | HDAC4    | HISTONE DEACETYLASE 4                                                             |
| 10014  | HDAC5     | HDAC5    | HISTONE DEACETYLASE 5                                                             |
| 51564  | HDAC7A    | HDAC7A   | HISTONE DEACETYLASE 7A                                                            |
| 55869  | HDAC8     | HDAC8    | HISTONE DEACETYLASE 8                                                             |
| 9734   | HDAC9     | HDAC9    | HISTONE DEACETYLASE 9                                                             |
| 3068   | HDGF      | HDGF     | HEPATOMA-DERIVED GROWTH FACTOR (HIGH-MOBILITY GROUP PROTEIN 1-LIKE)               |
| 84717  | HDGF2     | HDGF2    | HEPATOMA-DERIVED GROWTH FACTOR-RELATED PROTEIN 2                                  |
| 139324 | CXorf43   | HDX      | highly divergent homeobox                                                         |
| 9931   | HELZ      | HELZ     | HELICASE WITH ZINC FINGER                                                         |
| 3280   | HES1      | HES1     | HAIRY AND ENHANCER OF SPLIT 1, (DROSOPHILA)                                       |
| 54626  | HES2      | HES2     | HAIRY AND ENHANCER OF SPLIT 2 (DROSOPHILA)                                        |
| 57801  | HES4      | HES4     | HAIRY AND ENHANCER OF SPLIT 4 (DROSOPHILA)                                        |
| 55502  | HES6      | HES6     | HAIRY AND ENHANCER OF SPLIT 6 (DROSOPHILA)                                        |
| 84667  | HES7      | HES7     | HAIRY AND ENHANCER OF SPLIT 7 (DROSOPHILA)                                        |
| 8820   | HESX1     | HESX1    | HOMEBOX, ES CELL EXPRESSED 1                                                      |
| 10614  | HEXIM1    | HEXIM1   | HEXAMETHYLENE BIS-ACETAMIDE INDUCIBLE 1                                           |
| 23462  | HEY1      | HEY1     | HAIRY/ENHANCER-OF-SPLIT RELATED WITH YRPW MOTIF 1                                 |
| 23493  | HEY2      | HEY2     | HAIRY/ENHANCER-OF-SPLIT RELATED WITH YRPW MOTIF 2                                 |

|        |           |           |                                                                                          |
|--------|-----------|-----------|------------------------------------------------------------------------------------------|
| 26508  | HEYL      | HEYL      | HAIRY/ENHANCER-OF-SPLIT RELATED WITH YRPW MOTIF-LIKE                                     |
| 3087   | HEX       | HEX       | HOMEOBOX, HEMATOPOIETICALLY EXPRESSED                                                    |
| 3090   | HIC1      | HIC1      | HYPERMETHYLATED IN CANCER 1                                                              |
| 23119  | HIC2      | HIC2      | HYPERMETHYLATED IN CANCER 2                                                              |
| 3091   | HIF1A     | HIF1A     | HYPOXIA-INDUCIBLE FACTOR 1, ALPHA SUBUNIT (BASIC HELIX-LOOP-HELIX TRANSCRIPTION FACTOR)  |
| 55682  | HIF1AN    | HIF1AN    | HYPOXIA-INDUCIBLE FACTOR 1, ALPHA SUBUNIT INHIBITOR                                      |
| 64344  | HIF3A     | HIF3A     | HYPOXIA INDUCIBLE FACTOR 3, ALPHA SUBUNIT                                                |
| 3093   | HIP2      | HIP2      | HUNTINGTIN INTERACTING PROTEIN 2                                                         |
| 28996  | HIPK2     | HIPK2     | HOMEODOMAIN INTERACTING PROTEIN KINASE 2                                                 |
| 7290   | HIRA      | HIRA      | HIR HISTONE CELL CYCLE REGULATION DEFECTIVE HOMOLOG A (S. CEREVISIAE)                    |
| 3009   | HIST1H1B  | HIST1H1B  | HISTONE 1, H1B                                                                           |
| 3006   | HIST1H1C  | HIST1H1C  | HISTONE 1, H1C                                                                           |
| 3007   | HIST1H1D  | HIST1H1D  | HISTONE 1, H1D                                                                           |
| 3008   | HIST1H1E  | HIST1H1E  | HISTONE 1, H1E                                                                           |
| 3010   | HIST1H1T  | HIST1H1T  | HISTONE 1, H1T                                                                           |
| 8345   | HIST1H2BH | HIST1H2BH | HISTONE 1, H2BH                                                                          |
| 8970   | HIST1H2BJ | HIST1H2BJ | HISTONE 1, H2BJ                                                                          |
| 8341   | HIST1H2BN | HIST1H2BN | HISTONE 1, H2BN                                                                          |
| 3018   | HIST1H2BB | HIST2H2BE | HISTONE 1, H2BB                                                                          |
| 8349   | HIST2H2BE | HIST2H2BE | HISTONE 1, H2BB                                                                          |
| 3096   | HIVEP1    | HIVEP1    | HUMAN IMMUNODEFICIENCY VIRUS TYPE I ENHANCER BINDING PROTEIN 1                           |
| 3097   | HIVEP2    | HIVEP2    | HUMAN IMMUNODEFICIENCY VIRUS TYPE I ENHANCER BINDING PROTEIN 2                           |
| 59289  | HIVEP3    | HIVEP3    | HUMAN IMMUNODEFICIENCY VIRUS TYPE I ENHANCER BINDING PROTEIN 3                           |
| 284459 | HKR1      | HKR1      | GLI-KRUPPEL FAMILY MEMBER HKR1                                                           |
| 342945 | HKR2      | HKR2      | GLI-KRUPPEL FAMILY MEMBER HKR2                                                           |
| 3104   | HKR3      | HKR3      | GLI-KRUPPEL FAMILY MEMBER HKR3                                                           |
| 3131   | HLF       | HLF       | HEPATIC LEUKEMIA FACTOR                                                                  |
| 3142   | HLX1      | HLX1      | H2.0-LIKE HOMEOBOX 1 (DROSOPHILA)                                                        |
| 3110   | HLXB9     | HLXB9     | HOMEOBOX HB9                                                                             |
| 79618  | HMBOX1    | HMBOX1    | HOMEOBOX CONTAINING 1                                                                    |
| 10363  | HMG20A    | HMG20A    | HIGH-MOBILITY GROUP 20A                                                                  |
| 10362  | HMG20B    | HMG20B    | HIGH-MOBILITY GROUP 20B                                                                  |
| 10042  | HMG2L1    | HMG2L1    | PARTIAL TRANSCRIPT ENCOMPASSING THC211630 GENE                                           |
| 128872 | HMG4L     | HMG4L     | HIGH-MOBILITY GROUP (NONHISTONE CHROMOSOMAL) PROTEIN 4-LIKE                              |
| 3159   | HMG1A     | HMG1A     | HIGH MOBILITY GROUP AT-HOOK 1                                                            |
| 8091   | HMG2A     | HMG2A     | HIGH MOBILITY GROUP AT-HOOK 2                                                            |
| 3148   | HMG2B     | HMG2B     | HIGH-MOBILITY GROUP BOX 2                                                                |
| 3149   | HMG3B     | HMG3B     | HIGH-MOBILITY GROUP BOX 3                                                                |
| 127540 | HMG4B     | HMG4B     | HIGH-MOBILITY GROUP BOX 4                                                                |
| 3150   | HMG1      | HMG1      | HIGH-MOBILITY GROUP NUCLEOSOME BINDING DOMAIN 1                                          |
| 3151   | HMG2      | HMG2      | HIGH-MOBILITY GROUP NUCLEOSOMAL BINDING DOMAIN 2                                         |
| 9324   | HMG3      | HMG3      | HIGH MOBILITY GROUP NUCLEOSOMAL BINDING DOMAIN 3                                         |
| 10473  | HMG4      | HMG4      | HIGH MOBILITY GROUP NUCLEOSOMAL BINDING DOMAIN 4                                         |
| 3166   | HMX1      | HMX2      | HOMEOBOX (H6 FAMILY) 1                                                                   |
| 3172   | HNF4A     | HNF4A     | HEPATOCTYTE NUCLEAR FACTOR 4, ALPHA                                                      |
| 3174   | HNF4G     | HNF4G     | HEPATOCTYTE NUCLEAR FACTOR 4, GAMMA                                                      |
| 27288  | HNRNP-G-T | HNRNP-G-T | TESTES-SPECIFIC HETEROGENOUS NUCLEAR RIBONUCLEOPROTEIN G-T                               |
| 3182   | HNRPA     | HNRPA     | HETEROGENEOUS NUCLEAR RIBONUCLEOPROTEIN A/B                                              |
| 3184   | HNRPD     | HNRPD     | HETEROGENEOUS NUCLEAR RIBONUCLEOPROTEIN D (AU-RICH ELEMENT RNA BINDING PROTEIN 1, 37KDA) |
| 3190   | HNRPK     | HNRPK     | HETEROGENEOUS NUCLEAR RIBONUCLEOPROTEIN K                                                |
| 10236  | HNRPR     | HNRPR     | HETEROGENEOUS NUCLEAR RIBONUCLEOPROTEIN R                                                |
| 11100  | HNRPU1    | HNRPU1    | HETEROGENEOUS NUCLEAR RIBONUCLEOPROTEIN U-LIKE 1                                         |
| 57594  | KIAA1443  | HOMEX     | homeobox and leucine zipper encoding                                                     |
| 84525  | HOP       | HOP       | HOMEODOMAIN-ONLY PROTEIN                                                                 |
| 3198   | HOXA1     | HOXA1     | HOMEOBOX A1                                                                              |
| 3206   | HOXA10    | HOXA10    | HOMEOBOX A10                                                                             |
| 3207   | HOXA11    | HOXA11    | HOMEOBOX A11                                                                             |
| 3209   | HOXA13    | HOXA13    | HOMEOBOX A13                                                                             |
| 3199   | HOXA2     | HOXA2     | HOMEOBOX A2                                                                              |
| 3200   | HOXA3     | HOXA3     | HOMEOBOX A3                                                                              |
| 3201   | HOXA4     | HOXA4     | HOMEOBOX A4                                                                              |
| 3202   | HOXA5     | HOXA5     | HOMEOBOX A5                                                                              |
| 3203   | HOXA6     | HOXA6     | HOMEOBOX A6                                                                              |
| 3204   | HOXA7     | HOXA7     | HOMEOBOX A7                                                                              |
| 3205   | HOXA9     | HOXA9     | HOMEOBOX A9                                                                              |
| 3211   | HOXB1     | HOXB1     | HOMEOBOX B1                                                                              |
| 10481  | HOXB13    | HOXB13    | HOMEOBOX B13                                                                             |
| 3212   | HOXB2     | HOXB2     | HOMEOBOX B2                                                                              |
| 3213   | HOXB3     | HOXB3     | HOMEOBOX B3                                                                              |
| 3214   | HOXB4     | HOXB4     | HOMEOBOX B4                                                                              |
| 3215   | HOXB5     | HOXB5     | HOMEOBOX B5                                                                              |
| 3216   | HOXB6     | HOXB6     | HOMEOBOX B6                                                                              |
| 3217   | HOXB7     | HOXB7     | HOMEOBOX B7                                                                              |
| 3218   | HOXB8     | HOXB8     | HOMEOBOX B8                                                                              |
| 3219   | HOXB9     | HOXB9     | HOMEOBOX B9                                                                              |
| 3226   | HOXC10    | HOXC10    | HOMEOBOX C10                                                                             |
| 3227   | HOXC11    | HOXC11    | HOMEOBOX C11                                                                             |
| 3228   | HOXC12    | HOXC12    | HOMEOBOX C12                                                                             |
| 3229   | HOXC13    | HOXC13    | HOMEOBOX C13                                                                             |
| 3221   | HOXC4     | HOXC4     | HOMEOBOX C4                                                                              |
| 3222   | HOXC5     | HOXC5     | HOMEOBOX C5                                                                              |
| 3223   | HOXC6     | HOXC6     | HOMEOBOX C6                                                                              |
| 3224   | HOXC8     | HOXC8     | HOMEOBOX C8                                                                              |
| 3225   | HOXC9     | HOXC9     | HOMEOBOX C9                                                                              |
| 3231   | HOXD1     | HOXD1     | HOMEOBOX D1                                                                              |
| 3236   | HOXD10    | HOXD10    | HOMEOBOX D10                                                                             |
| 3237   | HOXD11    | HOXD11    | HOMEOBOX D11                                                                             |
| 3238   | HOXD12    | HOXD12    | HOMEOBOX D12                                                                             |
| 3239   | HOXD13    | HOXD13    | HOMEOBOX D13                                                                             |
| 3232   | HOXD3     | HOXD3     | HOMEOBOX D3                                                                              |
| 3233   | HOXD4     | HOXD4     | HOMEOBOX D4                                                                              |
| 3234   | HOXD8     | HOXD8     | HOMEOBOX D8                                                                              |
| 3235   | HOXD9     | HOXD9     | HOMEOBOX D9                                                                              |
| 55806  | HR        | HR        | HAIRLESS HOMOLOG (MOUSE)                                                                 |
| 3281   | HSBP1     | HSBP1     | HEAT SHOCK FACTOR BINDING PROTEIN 1                                                      |
| 3297   | HSF1      | HSF1      | HEAT SHOCK TRANSCRIPTION FACTOR 1                                                        |
| 3298   | HSF2      | HSF2      | HEAT SHOCK TRANSCRIPTION FACTOR 2                                                        |
| 11077  | HSF2BP    | HSF2BP    | HEAT SHOCK TRANSCRIPTION FACTOR 2 BINDING PROTEIN                                        |
| 3299   | HSF4      | HSF4      | HEAT SHOCK TRANSCRIPTION FACTOR 4                                                        |
| 51402  | LW-1      | HSFX1     | heat shock transcription factor family, X linked 1                                       |
| 88614  | HSFY1     | HSFY1     | HEAT SHOCK TRANSCRIPTION FACTOR, Y-LINKED 1                                              |
| 54737  | HSMP8     | HSMP8     | M-PHASE PHOSPHOPROTEIN, MPP8                                                             |
| 55552  | HSZFP36   | HSZFP36   | ZFP-36 FOR A ZINC FINGER PROTEIN                                                         |
| 10524  | HTATIP    | HTATIP    | HIV-1 TAT INTERACTING PROTEIN, 60KDA                                                     |
| 10553  | HTATIP2   | HTATIP2   | HIV-1 TAT INTERACTIVE PROTEIN 2, 30KDA                                                   |
| 27336  | HTATSF1   | HTATSF1   | HIV-1 TAT SPECIFIC FACTOR 1                                                              |
| 3344   | HTLF      | HTLF      | HUMAN T-CELL LEUKEMIA VIRUS ENHANCER FACTOR                                              |
| 3397   | ID1       | ID1       | INHIBITOR OF DNA BINDING 1, DOMINANT NEGATIVE HELIX-LOOP-HELIX PROTEIN                   |
| 3398   | ID2       | ID2       | INHIBITOR OF DNA BINDING 2, DOMINANT NEGATIVE HELIX-LOOP-HELIX PROTEIN                   |
| 3399   | ID3       | ID3       | INHIBITOR OF DNA BINDING 3, DOMINANT NEGATIVE HELIX-LOOP-HELIX PROTEIN                   |
| 3400   | ID4       | ID4       | INHIBITOR OF DNA BINDING 4, DOMINANT NEGATIVE HELIX-LOOP-HELIX PROTEIN                   |
| 3428   | IFI16     | IFI16     | INTERFERON, GAMMA-INDUCIBLE PROTEIN 16                                                   |
| 3508   | IGHMBP2   | IGHMBP2   | IMMUNOGLOBULIN MU BINDING PROTEIN 2                                                      |
| 3551   | IKKB      | IKKB      | INHIBITOR OF KAPPA LIGHT POLYPEPTIDE GENE ENHANCER IN B-CELLS, KINASE BETA               |
| 8517   | IKBK      | IKBK      | INHIBITOR OF KAPPA LIGHT POLYPEPTIDE GENE ENHANCER IN B-CELLS, KINASE GAMMA              |
| 3608   | ILF2      | ILF2      | INTERLEUKIN ENHANCER BINDING FACTOR 2, 45KDA                                             |
| 3609   | ILF3      | ILF3      | INTERLEUKIN ENHANCER BINDING FACTOR 3, 90KDA                                             |
| 3621   | ING1      | ING1      | INHIBITOR OF GROWTH FAMILY, MEMBER 1                                                     |
| 3622   | ING2      | ING2      | INHIBITOR OF GROWTH FAMILY, MEMBER 2                                                     |
| 54559  | ING3      | ING3      | INHIBITOR OF GROWTH FAMILY, MEMBER 3                                                     |
| 51147  | ING4      | ING4      | INHIBITOR OF GROWTH FAMILY, MEMBER 4                                                     |
| 84289  | ING5      | ING5      | INHIBITOR OF GROWTH FAMILY, MEMBER 5                                                     |
| 3642   | INSM1     | INSM1     | INSULINOMA-ASSOCIATED 1                                                                  |
| 84684  | INSM2     | INSM2     | INSULINOMA-ASSOCIATED 2                                                                  |
| 3651   | IPF1      | IPF1      | INSULIN PROMOTER FACTOR 1, HOMEODOMAIN TRANSCRIPTION FACTOR                              |
| 3659   | IRF1      | IRF1      | INTERFERON REGULATORY FACTOR 1                                                           |
| 3660   | IRF2      | IRF2      | INTERFERON REGULATORY FACTOR 2                                                           |
| 26145  | IRF2BP1   | IRF2BP1   | INTERFERON REGULATORY FACTOR 2 BINDING PROTEIN 1                                         |
| 3661   | IRF3      | IRF3      | INTERFERON REGULATORY FACTOR 3                                                           |

|        |           |           |                                                                                      |
|--------|-----------|-----------|--------------------------------------------------------------------------------------|
| 3662   | IRF4      | IRF4      | INTERFERON REGULATORY FACTOR 4                                                       |
| 3663   | IRF5      | IRF5      | INTERFERON REGULATORY FACTOR 5                                                       |
| 3664   | IRF6      | IRF6      | INTERFERON REGULATORY FACTOR 6                                                       |
| 3665   | IRF7      | IRF7      | INTERFERON REGULATORY FACTOR 7                                                       |
| 3394   | IRF8      | IRF8      | INTERFERON REGULATORY FACTOR 8                                                       |
| 79192  | IRX1      | IRX1      | IROQUOIS HOMEODOMAIN PROTEIN 1                                                       |
| 153572 | IRX2      | IRX2      | IROQUOIS HOMEODOMAIN PROTEIN 2                                                       |
| 79191  | IRX3      | IRX3      | IROQUOIS HOMEODOMAIN PROTEIN 3                                                       |
| 50805  | IRX4      | IRX4      | IROQUOIS HOMEODOMAIN PROTEIN 4                                                       |
| 10265  | IRX5      | IRX5      | IROQUOIS HOMEODOMAIN PROTEIN 5                                                       |
| 79190  | IRX6      | IRX6      | IROQUOIS HOMEODOMAIN PROTEIN 6                                                       |
| 283078 | MXK       | IRXL1     | IROQUOIS HOMEODOMAIN PROTEIN-LIKE 1                                                  |
| 3670   | ISL1      | ISL1      | ISL1 TRANSCRIPTION FACTOR, LIM/HOMEODOMAIN, (ISLET-1)                                |
| 64843  | ISL2      | ISL2      | ISL2 TRANSCRIPTION FACTOR, LIM/HOMEODOMAIN, (ISLET-2)                                |
| 10625  | IVNS1ABP  | IVNS1ABP  | INFLUENZA VIRUS NS1A BINDING PROTEIN                                                 |
| 5927   | JARID1A   | JARID1A   | JUMONJIL AT RICH INTERACTIVE DOMAIN 1A (RBBP2-LIKE)                                  |
| 10765  | JARID1B   | JARID1B   | JUMONJIL AT RICH INTERACTIVE DOMAIN 1B (RBBP2-LIKE)                                  |
| 3720   | JARID2    | JARID2    | JUMONJIL AT RICH INTERACTIVE DOMAIN 2                                                |
| 221895 | tcag7.981 | JAZF1     | JUXTAPOSED WITH ANOTHER ZINC FINGER GENE 1                                           |
| 122953 | JDP2      | JDP2      | JUN DIMERIZATION PROTEIN 2                                                           |
| 221037 | JMJD1C    | JMJD1C    | THYROID HORMONE RECEPTOR INTERACTOR 8                                                |
| 9682   | JMJD2A    | JMJD2A    | JUMONJIL DOMAIN CONTAINING 2A                                                        |
| 23030  | JMJD2B    | JMJD2B    | JUMONJIL DOMAIN CONTAINING 2B                                                        |
| 23081  | JMJD2C    | JMJD2C    | JUMONJIL DOMAIN CONTAINING 2C                                                        |
| 133746 | JMY       | JMY       | JUNCTION-MEDIATING AND REGULATORY PROTEIN                                            |
| 8629   | JRK       | JRK       | JERKY HOMOLOG (MOUSE)                                                                |
| 3725   | JUN       | JUN       | V-JUN SARCOMA VIRUS 17 ONCOGENE HOMOLOG (AVIAN)                                      |
| 3726   | JUNB      | JUNB      | JUN B PROTO-ONCOGENE                                                                 |
| 3727   | JUND      | JUND      | JUN D PROTO-ONCOGENE                                                                 |
| 30818  | KCNIP3    | KCNIP3    | KV CHANNEL INTERACTING PROTEIN 3, CALSLENILIN                                        |
| 10657  | KHDRBS1   | KHDRBS1   | KH DOMAIN CONTAINING, RNA BINDING, SIGNAL TRANSDUCTION ASSOCIATED 1                  |
| 202559 | KHDRBS2   | KHDRBS2   | KH DOMAIN CONTAINING, RNA BINDING, SIGNAL TRANSDUCTION ASSOCIATED 2                  |
| 8570   | KHSRP     | KHSRP     | KH-TYPE SPLICING REGULATORY PROTEIN (FUSE BINDING PROTEIN 2)                         |
| 22993  | KIAA0194  | KIAA0194  | KIAA0194 PROTEIN                                                                     |
| 10661  | KLF1      | KLF1      | KRUPPEL-LIKE FACTOR 1 (ERYTHROID)                                                    |
| 7071   | KLF10     | KLF10     | KRUPPEL-LIKE FACTOR 10                                                               |
| 8462   | KLF11     | KLF11     | KRUPPEL-LIKE FACTOR 11                                                               |
| 11278  | KLF12     | KLF12     | KRUPPEL-LIKE FACTOR 12                                                               |
| 51621  | KLF13     | KLF13     | KRUPPEL-LIKE FACTOR 13                                                               |
| 136259 | KLF14     | KLF14     | KRUPPEL-LIKE FACTOR 14                                                               |
| 28999  | KLF15     | KLF15     | KRUPPEL-LIKE FACTOR 15                                                               |
| 83855  | KLF16     | KLF16     | KRUPPEL-LIKE FACTOR 16                                                               |
| 10385  | KLF2      | KLF2      | KRUPPEL-LIKE FACTOR 2 (LUNG)                                                         |
| 51274  | KLF3      | KLF3      | KRUPPEL-LIKE FACTOR 3 (BASIC)                                                        |
| 9314   | KLF4      | KLF4      | KRUPPEL-LIKE FACTOR 4 (GLUT)                                                         |
| 688    | KLF5      | KLF5      | KRUPPEL-LIKE FACTOR 5 (INTESTINAL)                                                   |
| 1316   | KLF6      | KLF6      | KRUPPEL-LIKE FACTOR 6                                                                |
| 8609   | KLF7      | KLF7      | KRUPPEL-LIKE FACTOR 7 (UBIQUITOUS)                                                   |
| 11279  | KLF8      | KLF8      | KRUPPEL-LIKE FACTOR 8                                                                |
| 687    | KLF9      | KLF9      | KRUPPEL-LIKE FACTOR 9                                                                |
| 9735   | KNTC1     | KNTC1     | KINETOCHORE ASSOCIATED 1                                                             |
| 84626  | KIAA1962  | KRBA1     | KRAB-A domain containing 1                                                           |
| 26013  | L3MBTL    | L3MBTL    | LETHAL (3) MALIGNANT BRAIN TUMOR L(3)MBT PROTEIN (DROSOPHILA) HOMOLOG                |
| 83746  | L3MBTL2   | L3MBTL2   | L(3)MBT-LIKE 2 (DROSOPHILA)                                                          |
| 84456  | L3MBTL3   | L3MBTL3   | L(3)MBT-LIKE 3 (DROSOPHILA)                                                          |
| 91133  | L3MBTL4   | L3MBTL4   | L(3)MBT-LIKE 4 (DROSOPHILA)                                                          |
| 29956  | LASS2     | LASS2     | LAG1 LONGEVITY ASSURANCE HOMOLOG 2 (S. CEREVISIAE)                                   |
| 204219 | LASS3     | LASS3     | LAG1 LONGEVITY ASSURANCE HOMOLOG 3 (S. CEREVISIAE)                                   |
| 79603  | LASS4     | LASS4     | LAG1 LONGEVITY ASSURANCE HOMOLOG 4 (S. CEREVISIAE)                                   |
| 91012  | LASS5     | LASS5     | LAG1 LONGEVITY ASSURANCE HOMOLOG 5 (S. CEREVISIAE)                                   |
| 10680  | LBX1      | LBX1      | LADYBIRD HOMEODOMAIN HOMOLOG 1 (DROSOPHILA)                                          |
| 8861   | LDB1      | LDB1      | LIM DOMAIN BINDING 1                                                                 |
| 9079   | LDB2      | LDB2      | LIM DOMAIN BINDING 2                                                                 |
| 51176  | LEF1      | LEF1      | LYMPHOID ENHANCER-BINDING FACTOR 1                                                   |
| 3975   | LHX1      | LHX1      | LIM HOMEODOMAIN 1                                                                    |
| 9355   | LHX2      | LHX2      | LIM HOMEODOMAIN 2                                                                    |
| 8022   | LHX3      | LHX3      | LIM HOMEODOMAIN 3                                                                    |
| 89884  | LHX4      | LHX4      | LIM HOMEODOMAIN 4                                                                    |
| 64211  | LHX5      | LHX5      | LIM HOMEODOMAIN 5                                                                    |
| 26468  | LHX6      | LHX6      | LIM HOMEODOMAIN 6                                                                    |
| 56956  | LHX9      | LHX9      | LIM HOMEODOMAIN 9                                                                    |
| 8994   | LMD1      | LMD1      | LIM DOMAINS CONTAINING 1                                                             |
| 79727  | LIN28     | LIN28     | LIN-28 HOMOLOG (C. ELEGANS)                                                          |
| 4004   | LMO1      | LMO1      | LIM DOMAIN ONLY 1 (RHOMBOTIN 1)                                                      |
| 4005   | LMO2      | LMO2      | LIM DOMAIN ONLY 2 (RHOMBOTIN-LIKE 1)                                                 |
| 55885  | LMO3      | LMO3      | LIM DOMAIN ONLY 3 (RHOMBOTIN-LIKE 2)                                                 |
| 8543   | LMO4      | LMO4      | LIM DOMAIN ONLY 4                                                                    |
| 4007   | LMO6      | LMO6      | LIM DOMAIN ONLY 6                                                                    |
| 4009   | LMX1A     | LMX1A     | LIM HOMEODOMAIN TRANSCRIPTION FACTOR 1, ALPHA                                        |
| 4010   | LMX1B     | LMX1B     | LIM HOMEODOMAIN TRANSCRIPTION FACTOR 1, BETA                                         |
| 360030 | LOC360030 | LOC360030 | HOMEOBOX C14                                                                         |
| 643641 | LOC643641 | LOC643641 | SIMILAR TO ZINC FINGER PROTEIN 74 (HZNF7)                                            |
| 9208   | LRRFIP1   | LRRFIP1   | LEUCINE RICH REPEAT (IN FLI) INTERACTING PROTEIN 1                                   |
| 4066   | LYL1      | LYL1      | LYMPHOBLASTIC LEUKEMIA DERIVED SEQUENCE 1                                            |
| 8216   | LZTR1     | LZTR1     | LEUCINE-ZIPPER-LIKE TRANSCRIPTION REGULATOR 1                                        |
| 11178  | LZTS1     | LZTS1     | LEUCINE ZIPPER, PUTATIVE TUMOR SUPPRESSOR 1                                          |
| 4094   | MAF       | MAF       | V-MAF MUSCULOAPONEUROTIC FIBROSARCOMA ONCOGENE HOMOLOG (AVIAN)                       |
| 389692 | MAF1      | MAF1      | MAF1 HOMOLOG (S. CEREVISIAE)                                                         |
| 9935   | MAFA      | MAFA      | V-MAF MUSCULOAPONEUROTIC FIBROSARCOMA ONCOGENE HOMOLOG A (AVIAN)                     |
| 23764  | MAFB      | MAFB      | V-MAF MUSCULOAPONEUROTIC FIBROSARCOMA ONCOGENE HOMOLOG B (AVIAN)                     |
| 4097   | MAFG      | MAFG      | V-MAF MUSCULOAPONEUROTIC FIBROSARCOMA ONCOGENE HOMOLOG F (AVIAN)                     |
| 7975   | MAFK      | MAFK      | V-MAF MUSCULOAPONEUROTIC FIBROSARCOMA ONCOGENE HOMOLOG K (AVIAN)                     |
| 9794   | MAML1     | MAML1     | MASTERMIND-LIKE 1 (DROSOPHILA)                                                       |
| 55534  | MAML3     | MAML3     | MASTERMIND-LIKE 3 (DROSOPHILA)                                                       |
| 9782   | MATR3     | MATR3     | MATRIN 3                                                                             |
| 4149   | MAX       | MAX       | MYC ASSOCIATED FACTOR X                                                              |
| 4150   | MAZ       | MAZ       | MYC-ASSOCIATED ZINC FINGER PROTEIN (PURINE-BINDING TRANSCRIPTION FACTOR)             |
| 4152   | MBD1      | MBD1      | METHYL-CPG BINDING DOMAIN PROTEIN 1                                                  |
| 8932   | MBD2      | MBD2      | METHYL-CPG BINDING DOMAIN PROTEIN 2                                                  |
| 53615  | MBD3      | MBD3      | METHYL-CPG BINDING DOMAIN PROTEIN 3                                                  |
| 85509  | MBD3L1    | MBD3L1    | METHYL-CPG BINDING DOMAIN PROTEIN 3-LIKE 1                                           |
| 4171   | MCM2      | MCM2      | MCM2 MINICHROMOSOME MAINTENANCE DEFICIENT 2, MITOTIN (S. CEREVISIAE)                 |
| 4172   | MCM3      | MCM3      | MCM3 MINICHROMOSOME MAINTENANCE DEFICIENT 3 (S. CEREVISIAE)                          |
| 4173   | MCM4      | MCM4      | MCM4 MINICHROMOSOME MAINTENANCE DEFICIENT 4 (S. CEREVISIAE)                          |
| 4174   | MCM5      | MCM5      | MCM5 MINICHROMOSOME MAINTENANCE DEFICIENT 5, CELL DIVISION CYCLE 46 (S. CEREVISIAE)  |
| 4175   | MCM6      | MCM6      | MCM6 MINICHROMOSOME MAINTENANCE DEFICIENT 6 (MIS5 HOMOLOG, S. POMBE) (S. CEREVISIAE) |
| 4176   | MCM7      | MCM7      | MCM7 MINICHROMOSOME MAINTENANCE DEFICIENT 7 (S. CEREVISIAE)                          |
| 84515  | MCM8      | MCM8      | MCM8 MINICHROMOSOME MAINTENANCE DEFICIENT 8 (S. CEREVISIAE)                          |
| 254394 | MCMDC1    | MCMDC1    | MINICHROMOSOME MAINTENANCE DEFICIENT DOMAIN CONTAINING 1                             |
| 4194   | MDM4      | MDM4      | MDM4 TRANSFORMED 3T3 CELL DOUBLE MINUTE 4, P53 BINDING PROTEIN (MOUSE)               |
| 4204   | MECP2     | MECP2     | METHYL CPG BINDING PROTEIN 2 (RETT SYNDROME)                                         |
| 9968   | MED12     | MED12     | MEDIATOR OF RNA POLYMERASE II TRANSCRIPTION, SUBUNIT 12 HOMOLOG (YEAST)              |
| 51003  | MED31     | MED31     | MEDIATOR OF RNA POLYMERASE II TRANSCRIPTION, SUBUNIT 31 HOMOLOG (YEAST)              |
| 29079  | MED4      | MED4      | MEDIATOR OF RNA POLYMERASE II TRANSCRIPTION, SUBUNIT 4 HOMOLOG (YEAST)               |
| 10001  | MED6      | MED6      | MEDIATOR OF RNA POLYMERASE II TRANSCRIPTION, SUBUNIT 6 HOMOLOG (YEAST)               |
| 112950 | MED8      | MED8      | MEDIATOR OF RNA POLYMERASE II TRANSCRIPTION, SUBUNIT 8 HOMOLOG (YEAST)               |
| 4205   | MEF2A     | MEF2A     | MADS BOX TRANSCRIPTION ENHANCER FACTOR 2, POLYPEPTIDE A (MYOCYTE ENHANCER FACTOR 2A) |
| 4207   | MEF2B     | MEF2B     | MADS BOX TRANSCRIPTION ENHANCER FACTOR 2, POLYPEPTIDE B (MYOCYTE ENHANCER FACTOR 2B) |
| 4208   | MEF2C     | MEF2C     | MADS BOX TRANSCRIPTION ENHANCER FACTOR 2, POLYPEPTIDE C (MYOCYTE ENHANCER FACTOR 2C) |
| 4209   | MEF2D     | MEF2D     | MADS BOX TRANSCRIPTION ENHANCER FACTOR 2, POLYPEPTIDE D (MYOCYTE ENHANCER FACTOR 2D) |
| 4211   | MEIS1     | MEIS1     | MEIS1, MYELOID ECOTROPIC VIRAL INTEGRATION SITE 1 HOMOLOG (MOUSE)                    |
| 4212   | MEIS2     | MEIS2     | MEIS1, MYELOID ECOTROPIC VIRAL INTEGRATION SITE 1 HOMOLOG 2 (MOUSE)                  |
| 56917  | MEIS3     | MEIS3     | MEIS1, MYELOID ECOTROPIC VIRAL INTEGRATION SITE 1 HOMOLOG 3 (MOUSE)                  |
| 4213   | MEIS3P1   | MEIS3P1   | MEIS1 HOMOLOG 3 (MOUSE) PSEUDOGENE 1                                                 |
| 4221   | MEN1      | MEN1      | MULTIPLE ENDOCRINE NEOPLASIA 1                                                       |
| 4222   | MEOX1     | MEOX1     | MESENCHYME HOMEODOMAIN 1                                                             |
| 4223   | MEOX2     | MEOX2     | MESENCHYME HOMEODOMAIN 2                                                             |
| 170082 | MGC17403  | MGC17403  | TFIIIS central domain-containing protein 1                                           |

|        |          |         |                                                                                                 |
|--------|----------|---------|-------------------------------------------------------------------------------------------------|
| 65988  | ZNF747   | MGC2474 | ZINC FINGER PROTEIN 747                                                                         |
| 4286   | MTF      | MTF     | MICROPHthalmia-ASSOCIATED TRANSCRIPTION FACTOR                                                  |
| 63881  | MXL1     | MXL1    | MX1 HOMEBOX-LIKE 1 (XENOPUS LAEVIS)                                                             |
| 25988  | MZF      | MZF     | MBD2-INTERACTING ZINC FINGER                                                                    |
| 84365  | MK67IP   | MK67IP  | MK167 (FHA DOMAIN) INTERACTING NUCLEOLAR PHOSPHOPROTEIN                                         |
| 57591  | MKL1     | MKL1    | MEGAKARYOBLASTIC LEUKEMIA (TRANSLOCATION) 1                                                     |
| 57496  | MKL2     | MKL2    | MKL/MYOCARDIN-LIKE 2                                                                            |
| 4297   | MLL      | MLL     | MYELOID/LYMPHOID OR MIXED-LINEAGE LEUKEMIA (TRITHORAX HOMOLOG, DROSOPHILA)                      |
| 8085   | MLL2     | MLL2    | MYELOID/LYMPHOID OR MIXED-LINEAGE LEUKEMIA 2                                                    |
| 58508  | MLL3     | MLL3    | MYELOID/LYMPHOID OR MIXED-LINEAGE LEUKEMIA 3                                                    |
| 9757   | MLL4     | MLL4    | MYELOID/LYMPHOID OR MIXED-LINEAGE LEUKEMIA 4                                                    |
| 55904  | MLL5     | MLL5    | MYELOID/LYMPHOID OR MIXED-LINEAGE LEUKEMIA 5                                                    |
| 4298   | MLL11    | MLL11   | MYELOID/LYMPHOID OR MIXED-LINEAGE LEUKEMIA (TRITHORAX HOMOLOG, DROSOPHILA); TRANSLOCATED TO, 1  |
| 8028   | MLL10    | MLL10   | MYELOID/LYMPHOID OR MIXED-LINEAGE LEUKEMIA (TRITHORAX HOMOLOG, DROSOPHILA); TRANSLOCATED TO, 10 |
| 4300   | MLL3     | MLL3    | MYELOID/LYMPHOID OR MIXED-LINEAGE LEUKEMIA (TRITHORAX HOMOLOG, DROSOPHILA); TRANSLOCATED TO, 3  |
| 4302   | MLL7     | MLL7    | MYELOID/LYMPHOID OR MIXED-LINEAGE LEUKEMIA (TRITHORAX HOMOLOG, DROSOPHILA); TRANSLOCATED TO, 6  |
| 4303   | MLL7     | MLL7    | MYELOID/LYMPHOID OR MIXED-LINEAGE LEUKEMIA (TRITHORAX HOMOLOG, DROSOPHILA); TRANSLOCATED TO, 7  |
| 254251 | MLR1     | MLR1    | TRANSCRIPTION FACTOR MLR1                                                                       |
| 84458  | MLR2     | MLR2    | LIGAND-DEPENDENT COREPRESSOR                                                                    |
| 6945   | MLX      | MLX     | MAX-LIKE PROTEIN X                                                                              |
| 22877  | MLXIP    | MLXIP   | MLX INTERACTING PROTEIN                                                                         |
| 51085  | MLXIPL   | MLXIPL  | MLX INTERACTING PROTEIN-LIKE                                                                    |
| 64210  | MMS19L   | MMS19L  | MMS19-LIKE (MET18 HOMOLOG, S. CERVISIAE)                                                        |
| 4332   | MND4     | MND4    | MYELOID CELL NUCLEAR DIFFERENTIATION ANTIGEN                                                    |
| 4335   | MNT      | MNT     | MAX BINDING PROTEIN                                                                             |
| 10934  | MORF4    | MORF4   | MORTALITY FACTOR 4                                                                              |
| 9242   | MSC      | MSC     | MUSCULIN (ACTIVATED B-CELL FACTOR-1)                                                            |
| 10943  | MSL3L1   | MSL3L1  | MALE-SPECIFIC LETHAL 3-LIKE 1 (DROSOPHILA)                                                      |
| 4487   | MSX1     | MSX1    | MSH HOMEBOX HOMOLOG 1 (DROSOPHILA)                                                              |
| 4488   | MSX2     | MSX2    | MSH HOMEBOX HOMOLOG 2 (DROSOPHILA)                                                              |
| 9112   | MTA1     | MTA1    | METASTASIS ASSOCIATED 1                                                                         |
| 9219   | MTA2     | MTA2    | METASTASIS ASSOCIATED 1 FAMILY, MEMBER 2                                                        |
| 57504  | MTA3     | MTA3    | METASTASIS ASSOCIATED 1 FAMILY, MEMBER 3                                                        |
| 4520   | MTF1     | MTF1    | METAL-REGULATORY TRANSCRIPTION FACTOR 1                                                         |
| 22823  | MTF2     | MTF2    | METAL RESPONSE ELEMENT BINDING TRANSCRIPTION FACTOR 2                                           |
| 4084   | MXD1     | MXD1    | MAX DIMERIZATION PROTEIN 1                                                                      |
| 83463  | MXD3     | MXD3    | MAX DIMERIZATION PROTEIN 3                                                                      |
| 10608  | MXD4     | MXD4    | MAX DIMERIZATION PROTEIN 4                                                                      |
| 4601   | MXI1     | MXI1    | MAX INTERACTOR 1                                                                                |
| 4602   | MYB      | MYB     | V-MYB MYELOBLASTOSIS VIRAL ONCOGENE HOMOLOG (AVIAN)                                             |
| 10514  | MYBBP1A  | MYBBP1A | MYB BINDING PROTEIN (P160) 1A                                                                   |
| 4603   | MYBL1    | MYBL1   | V-MYB MYELOBLASTOSIS VIRAL ONCOGENE HOMOLOG (AVIAN)-LIKE 1                                      |
| 4605   | MYBL2    | MYBL2   | V-MYB MYELOBLASTOSIS VIRAL ONCOGENE HOMOLOG (AVIAN)-LIKE 2                                      |
| 4609   | MYC      | MYC     | V-MYC MYELOCYTOTOMATOSIS VIRAL ONCOGENE HOMOLOG (AVIAN)                                         |
| 26292  | MYCBP    | MYCBP   | C-MYC BINDING PROTEIN                                                                           |
| 4610   | MYCL1    | MYCL1   | V-MYC MYELOCYTOTOMATOSIS VIRAL ONCOGENE HOMOLOG 1, LUNG CARCINOMA DERIVED (AVIAN)               |
| 4613   | MYCN     | MYCN    | V-MYC MYELOCYTOTOMATOSIS VIRAL RELATED ONCOGENE, NEUROBLASTOMA DERIVED (AVIAN)                  |
| 50804  | MYEF2    | MYEF2   | MYELIN EXPRESSION FACTOR 2                                                                      |
| 4617   | MYF5     | MYF5    | MYOGENIC FACTOR 5                                                                               |
| 4618   | MYF6     | MYF6    | MYOGENIC FACTOR 6 (HERCULIN)                                                                    |
| 55892  | MYNN     | MYNN    | MYONEURIN                                                                                       |
| 93649  | MYOCD    | MYOCD   | MYOCARDIN                                                                                       |
| 4654   | MYOD1    | MYOD1   | MYOGENIC DIFFERENTIATION 1                                                                      |
| 4656   | MYOG     | MYOG    | MYOGENIN (MYOGENIC FACTOR 4)                                                                    |
| 11143  | MYST2    | MYST2   | MYST HISTONE ACETYLTRANSFERASE 2                                                                |
| 7994   | MYST3    | MYST3   | MYST HISTONE ACETYLTRANSFERASE (MONOCYTTIC LEUKEMIA) 3                                          |
| 23522  | MYST4    | MYST4   | MYST HISTONE ACETYLTRANSFERASE (MONOCYTTIC LEUKEMIA) 4                                          |
| 23040  | MYT1L    | MYT1L   | MYELIN TRANSCRIPTION FACTOR 1-LIKE                                                              |
| 4664   | NAB1     | NAB1    | NGF-A BINDING PROTEIN 1 (EGR1 BINDING PROTEIN 1)                                                |
| 4665   | NAB2     | NAB2    | NGF-A BINDING PROTEIN 2 (EGR1 BINDING PROTEIN 2)                                                |
| 79923  | NANOG    | NANOG   | NANOG HOMEBOX                                                                                   |
| 4674   | NAP12    | NAP12   | NUCLEOSOME ASSEMBLY PROTEIN 1-LIKE 2                                                            |
| 4675   | NAP1L3   | NAP1L3  | NUCLEOSOME ASSEMBLY PROTEIN 1-LIKE 3                                                            |
| 4676   | NAP1L4   | NAP1L4  | NUCLEOSOME ASSEMBLY PROTEIN 1-LIKE 4                                                            |
| 80155  | NARG1    | NARG1   | NMDA RECEPTOR REGULATED 1                                                                       |
| 8648   | NCOA1    | NCOA1   | NUCLEAR RECEPTOR COACTIVATOR 1                                                                  |
| 10499  | NCOA2    | NCOA2   | NUCLEAR RECEPTOR COACTIVATOR 2                                                                  |
| 8202   | NCOA3    | NCOA3   | NUCLEAR RECEPTOR COACTIVATOR 3                                                                  |
| 8031   | NCOA4    | NCOA4   | NUCLEAR RECEPTOR COACTIVATOR 4                                                                  |
| 57727  | NCOA5    | NCOA5   | NUCLEAR RECEPTOR COACTIVATOR 5                                                                  |
| 23054  | NCOA6    | NCOA6   | NUCLEAR RECEPTOR COACTIVATOR 6                                                                  |
| 9611   | NCOR1    | NCOR1   | NUCLEAR RECEPTOR CO-REPRESSOR 1                                                                 |
| 9612   | NCOR2    | NCOR2   | NUCLEAR RECEPTOR CO-REPRESSOR 2                                                                 |
| 4692   | NDN      | NDN     | NECDIN HOMOLOG (MOUSE)                                                                          |
| 56160  | NDNL2    | NDNL2   | NECDIN-LIKE 2                                                                                   |
| 252969 | NEIL2    | NEIL2   | HYPOTHETICAL PROTEIN MGC2832                                                                    |
| 4760   | NEUROD1  | NEUROD1 | NEUROGENIC DIFFERENTIATION 1                                                                    |
| 4761   | NEUROD2  | NEUROD2 | NEUROGENIC DIFFERENTIATION 2                                                                    |
| 58158  | NEUROD4  | NEUROD4 | NEUROGENIC DIFFERENTIATION 4                                                                    |
| 63974  | NEUROD6  | NEUROD6 | NEUROGENIC DIFFERENTIATION 6                                                                    |
| 4762   | NEUROG1  | NEUROG1 | NEUROGENIN 1                                                                                    |
| 63973  | NEUROG2  | NEUROG2 | NEUROGENIN 2                                                                                    |
| 50674  | NEUROG3  | NEUROG3 | NEUROGENIN 3                                                                                    |
| 10725  | NFAT5    | NFAT5   | NUCLEAR FACTOR OF ACTIVATED T-CELLS 5, TONICITY-RESPONSIVE                                      |
| 4772   | NFATC1   | NFATC1  | NUCLEAR FACTOR OF ACTIVATED T-CELLS, CYTOPLASMIC, CALCINEURIN-DEPENDENT 1                       |
| 4773   | NFATC2   | NFATC2  | NUCLEAR FACTOR OF ACTIVATED T-CELLS, CYTOPLASMIC, CALCINEURIN-DEPENDENT 2                       |
| 4775   | NFATC3   | NFATC3  | NUCLEAR FACTOR OF ACTIVATED T-CELLS, CYTOPLASMIC, CALCINEURIN-DEPENDENT 3                       |
| 4776   | NFATC4   | NFATC4  | NUCLEAR FACTOR OF ACTIVATED T-CELLS, CYTOPLASMIC, CALCINEURIN-DEPENDENT 4                       |
| 4778   | NFE2     | NFE2    | NUCLEAR FACTOR (ERYTHROID-DERIVED 2), 45KDA                                                     |
| 4779   | NFE2L1   | NFE2L1  | NUCLEAR FACTOR (ERYTHROID-DERIVED 2)-LIKE 1                                                     |
| 4780   | NFE2L2   | NFE2L2  | NUCLEAR FACTOR (ERYTHROID-DERIVED 2)-LIKE 2                                                     |
| 9603   | NFE2L3   | NFE2L3  | NUCLEAR FACTOR (ERYTHROID-DERIVED 2)-LIKE 3                                                     |
| 4774   | NFIA     | NFIA    | NUCLEAR FACTOR I/A                                                                              |
| 4781   | NFIB     | NFIB    | NUCLEAR FACTOR I/B                                                                              |
| 4782   | NFIC     | NFIC    | NUCLEAR FACTOR I/C (CCAAT-BINDING TRANSCRIPTION FACTOR)                                         |
| 4783   | NFIL3    | NFIL3   | NUCLEAR FACTOR, INTERLEUKIN 3 REGULATED                                                         |
| 4784   | NFIX     | NFIX    | NUCLEAR FACTOR I/X (CCAAT-BINDING TRANSCRIPTION FACTOR)                                         |
| 4790   | NFKB1    | NFKB1   | NUCLEAR FACTOR OF KAPPA LIGHT POLYPEPTIDE GENE ENHANCER IN B-CELLS 1 (P105)                     |
| 4791   | NFKB2    | NFKB2   | NUCLEAR FACTOR OF KAPPA LIGHT POLYPEPTIDE GENE ENHANCER IN B-CELLS 2 (P49/P100)                 |
| 4792   | NFKBIA   | NFKBIA  | NUCLEAR FACTOR OF KAPPA LIGHT POLYPEPTIDE GENE ENHANCER IN B-CELLS INHIBITOR, ALPHA             |
| 4793   | NFKBIB   | NFKBIB  | NUCLEAR FACTOR OF KAPPA LIGHT POLYPEPTIDE GENE ENHANCER IN B-CELLS INHIBITOR, BETA              |
| 4795   | NFKBIL1  | NFKBIL1 | NUCLEAR FACTOR OF KAPPA LIGHT POLYPEPTIDE GENE ENHANCER IN B-CELLS INHIBITOR-LIKE 1             |
| 4796   | NFKBIL2  | NFKBIL2 | NUCLEAR FACTOR OF KAPPA LIGHT POLYPEPTIDE GENE ENHANCER IN B-CELLS INHIBITOR-LIKE 2             |
| 64332  | NFKBIZ   | NFKBIZ  | NUCLEAR FACTOR OF KAPPA LIGHT POLYPEPTIDE GENE ENHANCER IN B-CELLS INHIBITOR, ZETA              |
| 4798   | NFRKB    | NFRKB   | NUCLEAR FACTOR RELATED TO KAPPAB BINDING PROTEIN                                                |
| 4799   | NFX1     | NFX1    | NUCLEAR TRANSCRIPTION FACTOR, X-BOX BINDING 1                                                   |
| 152518 | NFXL1    | NFXL1   | NUCLEAR TRANSCRIPTION FACTOR, X-BOX BINDING-LIKE 1                                              |
| 4800   | NFYA     | NFYA    | NUCLEAR TRANSCRIPTION FACTOR Y, ALPHA                                                           |
| 4801   | NFYB     | NFYB    | NUCLEAR TRANSCRIPTION FACTOR Y, BETA                                                            |
| 4802   | NFYC     | NFYC    | NUCLEAR TRANSCRIPTION FACTOR Y, GAMMA                                                           |
| 4807   | NHLH1    | NHLH1   | NESCIENT HELIX LOOP HELIX 1                                                                     |
| 4808   | NHLH2    | NHLH2   | NESCIENT HELIX LOOP HELIX 2                                                                     |
| 85409  | NKD2     | NKD2    | NAKED CUTICLE HOMOLOG 2 (DROSOPHILA)                                                            |
| 55922  | NKRF     | NKRF    | NFKB repressing factor                                                                          |
| 4821   | NKX2-2   | NKX2-2  | NK2 TRANSCRIPTION FACTOR RELATED, LOCUS 2 (DROSOPHILA)                                          |
| 159296 | NKX2-3   | NKX2-3  | NK2 TRANSCRIPTION FACTOR HOMOLOG C (DROSOPHILA)                                                 |
| 1482   | NKX2-5   | NKX2-5  | NK2 TRANSCRIPTION FACTOR RELATED, LOCUS 5 (DROSOPHILA)                                          |
| 26257  | NKX2-8   | NKX2-8  | NK2 TRANSCRIPTION FACTOR RELATED, LOCUS 8 (DROSOPHILA)                                          |
| 4824   | NKX3-1   | NKX3-1  | NK3 TRANSCRIPTION FACTOR RELATED, LOCUS 1 (DROSOPHILA)                                          |
| 4825   | NKX6-1   | NKX6-1  | NK6 TRANSCRIPTION FACTOR RELATED, LOCUS 1 (DROSOPHILA)                                          |
| 84504  | NKX6-2   | NKX6-2  | NK6 TRANSCRIPTION FACTOR RELATED, LOCUS 2 (DROSOPHILA)                                          |
| 157848 | FLJ25169 | NKX6-3  | NK6 homeobox 3                                                                                  |
| 4831   | NME2     | NME2    | NON-METASTATIC CELLS 2, PROTEIN (NM23B) EXPRESSED IN                                            |
| 9111   | NMI      | NMI     | N-MYC (AND STAT) INTERACTOR                                                                     |
| 8725   | C19orf2  | NNX3    | CHROMOSOME 19 OPEN READING FRAME 2                                                              |
| 4841   | NONO     | NONO    | NON-POU DOMAIN CONTAINING, OCTAMER-BINDING                                                      |
| 4853   | NOTCH2   | NOTCH2  | NOTCH HOMOLOG 2 (DROSOPHILA)                                                                    |
| 4854   | NOTCH3   | NOTCH3  | NOTCH HOMOLOG 3 (DROSOPHILA)                                                                    |
| 4855   | NOTCH4   | NOTCH4  | NOTCH HOMOLOG 4 (DROSOPHILA)                                                                    |

|        |         |           |                                                                                                              |
|--------|---------|-----------|--------------------------------------------------------------------------------------------------------------|
| 4861   | NPAS1   | NPAS1     | NEURONAL PAS DOMAIN PROTEIN 1                                                                                |
| 4862   | NPAS2   | NPAS2     | NEURONAL PAS DOMAIN PROTEIN 2                                                                                |
| 64067  | NPAS3   | NPAS3     | NEURONAL PAS DOMAIN PROTEIN 3                                                                                |
| 4869   | NPM1    | NPM1      | NUCLEOPHOSMIN (NUCLEOLAR PHOSPHOPROTEIN B23, NUMATRIN)                                                       |
| 10381  | NPM2    | NPM2      | NUCLEOPHOSMIN/NUCLEOPLASMIN, 2                                                                               |
| 190    | NR0B1   | NR0B1     | NUCLEAR RECEPTOR SUBFAMILY 0, GROUP B, MEMBER 1                                                              |
| 8431   | NR0B2   | NR0B2     | NUCLEAR RECEPTOR SUBFAMILY 0, GROUP B, MEMBER 2                                                              |
| 9572   | NR1D1   | NR1D1     | NUCLEAR RECEPTOR SUBFAMILY 1, GROUP D, MEMBER 1                                                              |
| 9975   | NR1D2   | NR1D2     | NUCLEAR RECEPTOR SUBFAMILY 1, GROUP D, MEMBER 2                                                              |
| 7376   | NR1H2   | NR1H2     | NUCLEAR RECEPTOR SUBFAMILY 1, GROUP H, MEMBER 2                                                              |
| 10082  | NR1H3   | NR1H3     | NUCLEAR RECEPTOR SUBFAMILY 1, GROUP H, MEMBER 3                                                              |
| 9971   | NR1H4   | NR1H4     | NUCLEAR RECEPTOR SUBFAMILY 1, GROUP H, MEMBER 4                                                              |
| 8556   | NR1I2   | NR1I2     | NUCLEAR RECEPTOR SUBFAMILY 1, GROUP I, MEMBER 2                                                              |
| 9970   | NR1I3   | NR1I3     | NUCLEAR RECEPTOR SUBFAMILY 1, GROUP I, MEMBER 3                                                              |
| 7181   | NR2C1   | NR2C1     | NUCLEAR RECEPTOR SUBFAMILY 2, GROUP C, MEMBER 1                                                              |
| 7182   | NR2C2   | NR2C2     | NUCLEAR RECEPTOR SUBFAMILY 2, GROUP C, MEMBER 2                                                              |
| 7101   | NR2E1   | NR2E1     | NUCLEAR RECEPTOR SUBFAMILY 2, GROUP E, MEMBER 1                                                              |
| 10002  | NR2E3   | NR2E3     | NUCLEAR RECEPTOR SUBFAMILY 2, GROUP E, MEMBER 3                                                              |
| 7025   | NR2F1   | NR2F1     | NUCLEAR RECEPTOR SUBFAMILY 2, GROUP F, MEMBER 1                                                              |
| 7026   | NR2F2   | NR2F2     | NUCLEAR RECEPTOR SUBFAMILY 2, GROUP F, MEMBER 2                                                              |
| 2063   | NR2F6   | NR2F6     | NUCLEAR RECEPTOR SUBFAMILY 2, GROUP F, MEMBER 6                                                              |
| 2908   | NR3C1   | NR3C1     | NUCLEAR RECEPTOR SUBFAMILY 3, GROUP C, MEMBER 1 (GLUCOCORTICOID RECEPTOR)                                    |
| 4306   | NR3C2   | NR3C2     | NUCLEAR RECEPTOR SUBFAMILY 3, GROUP C, MEMBER 2                                                              |
| 3164   | NR4A1   | NR4A1     | NUCLEAR RECEPTOR SUBFAMILY 4, GROUP A, MEMBER 1                                                              |
| 4929   | NR4A2   | NR4A2     | NUCLEAR RECEPTOR SUBFAMILY 4, GROUP A, MEMBER 2                                                              |
| 8013   | NR4A3   | NR4A3     | NUCLEAR RECEPTOR SUBFAMILY 4, GROUP A, MEMBER 3                                                              |
| 2516   | NR5A1   | NR5A1     | NUCLEAR RECEPTOR SUBFAMILY 5, GROUP A, MEMBER 1                                                              |
| 2494   | NR5A2   | NR5A2     | NUCLEAR RECEPTOR SUBFAMILY 5, GROUP A, MEMBER 2                                                              |
| 29982  | NRBF2   | NRBF2     | NUCLEAR RECEPTOR BINDING FACTOR 2                                                                            |
| 4899   | NRF1    | NRF1      | NUCLEAR RESPIRATORY FACTOR 1                                                                                 |
| 8204   | NRIP1   | NRIP1     | NUCLEAR RECEPTOR INTERACTING PROTEIN 1                                                                       |
| 4901   | NRL     | NRL       | NEURAL, RETINA LEUCINE ZIPPER                                                                                |
| 79366  | NSBP1   | NSBP1     | NUCLEOSOMAL BINDING PROTEIN 1                                                                                |
| 64324  | NSD1    | NSD1      | NUCLEAR RECEPTOR BINDING SET DOMAIN PROTEIN 1                                                                |
| 116448 | OLIG1   | OLIG1     | OLIGODENDROCYTE TRANSCRIPTION FACTOR 1                                                                       |
| 10215  | OLIG2   | OLIG2     | OLIGODENDROCYTE LINEAGE TRANSCRIPTION FACTOR 2                                                               |
| 167826 | OLIG3   | OLIG3     | OLIGODENDROCYTE TRANSCRIPTION FACTOR 3                                                                       |
| 3175   | ONECUT1 | ONECUT1   | ONE CUT DOMAIN, FAMILY MEMBER 1                                                                              |
| 9480   | ONECUT2 | ONECUT2   | ONE CUT DOMAIN, FAMILY MEMBER 2                                                                              |
| 4999   | ORC2L   | ORC2L     | ORIGIN RECOGNITION COMPLEX, SUBUNIT 2-LIKE (YEAST)                                                           |
| 158800 | OTEX    | OTEX      | PAIRED-LIKE HOMEBOX PROTEIN OTEX                                                                             |
| 5013   | OTX1    | OTX1      | ORTHODENTICLE HOMOLOG 1 (DROSOPHILA)                                                                         |
| 5015   | OTX2    | OTX2      | ORTHODENTICLE HOMOLOG 2 (DROSOPHILA)                                                                         |
| 1406   | CRX     | OTX3      | CONE-ROD HOMEBOX                                                                                             |
| 5017   | OVOL1   | OVOL1     | OVO-LIKE 1 (DROSOPHILA)                                                                                      |
| 58495  | OVOL2   | OVOL2     | OVO-LIKE 2 (DROSOPHILA)                                                                                      |
| 26471  | P8      | P8        | P8 PROTEIN (CANDIDATE OF METASTASIS 1)                                                                       |
| 5036   | PA2G4   | PA2G4     | PROLIFERATION-ASSOCIATED 2G4, 38KDA                                                                          |
| 10914  | PAPOLA  | PAPOLA    | POLY(A) POLYMERASE ALPHA                                                                                     |
| 56903  | PAPOLB  | PAPOLB    | POLY(A) POLYMERASE BETA (TESTIS SPECIFIC)                                                                    |
| 64895  | PAPOLG  | PAPOLG    | POLY(A) POLYMERASE GAMMA                                                                                     |
| 5073   | PARN    | PARN      | POLY(A)-SPECIFIC RIBONUCLEASE (DEADENYLATION NUCLEASE)                                                       |
| 142    | PARP1   | PARP1     | POLY (ADP-RIBOSE) POLYMERASE FAMILY, MEMBER 1                                                                |
| 5074   | PAWR    | PAWR      | PRKC, APOPTOSIS, WT1, REGULATOR                                                                              |
| 5075   | PAX1    | PAX1      | PAIRED BOX GENE 1                                                                                            |
| 5076   | PAX2    | PAX2      | PAIRED BOX GENE 2                                                                                            |
| 5077   | PAX3    | PAX3      | PAIRED BOX GENE 3 (WAARDENBURG SYNDROME 1)                                                                   |
| 5078   | PAX4    | PAX4      | PAIRED BOX GENE 4                                                                                            |
| 5079   | PAX5    | PAX5      | PAIRED BOX GENE 5 (B-CELL LINEAGE SPECIFIC ACTIVATOR)                                                        |
| 5080   | PAX6    | PAX6      | PAIRED BOX GENE 6 (ANIRIDIA, KERATITIS)                                                                      |
| 5081   | PAX7    | PAX7      | PAIRED BOX GENE 7                                                                                            |
| 7849   | PAX8    | PAX8      | PAIRED BOX GENE 8                                                                                            |
| 5083   | PAX9    | PAX9      | PAIRED BOX GENE 9                                                                                            |
| 55193  | PB1     | PB1       | POLYBROMO 1                                                                                                  |
| 5087   | PBX1    | PBX1      | PRE-B-CELL LEUKEMIA TRANSCRIPTION FACTOR 1                                                                   |
| 5089   | PBX2    | PBX2      | PRE-B-CELL LEUKEMIA TRANSCRIPTION FACTOR 2                                                                   |
| 5090   | PBX3    | PBX3      | PRE-B-CELL LEUKEMIA TRANSCRIPTION FACTOR 3                                                                   |
| 80714  | PBX4    | PBX4      | PRE-B-CELL LEUKEMIA TRANSCRIPTION FACTOR 4                                                                   |
| 57326  | PBXIP1  | PBXIP1    | PRE-B-CELL LEUKEMIA TRANSCRIPTION FACTOR INTERACTING PROTEIN 1                                               |
| 8850   | PCAF    | PCAF      | P300/CBP-ASSOCIATED FACTOR                                                                                   |
| 5092   | PCBD1   | PCBD1     | PTERIN-4 ALPHA-CARBINOLAMINE DEHYDRATASE/DIMERIZATION COFACTOR OF HEPATOCYTE NUCLEAR FACTOR 1 ALPHA (TCF1)   |
| 84102  | PCGF2   | PCGF2     | PTERIN-4 ALPHA-CARBINOLAMINE DEHYDRATASE/DIMERIZATION COFACTOR OF HEPATOCYTE NUCLEAR FACTOR 1 ALPHA (TCF1) 2 |
| 7703   | PCGF2   | PCGF2     | POLYCOMB GROUP RING FINGER 2                                                                                 |
| 648    | PCGF4   | PCGF4     | POLYCOMB GROUP RING FINGER 4                                                                                 |
| 84108  | PCGF6   | PCGF6     | POLYCOMB GROUP RING FINGER 6                                                                                 |
| 4661   | PCMTD2  | PCMTD2    | MYELIN TRANSCRIPTION FACTOR 1                                                                                |
| 51586  | PCQAP   | PCQAP     | TRINUCLEOTIDE REPEAT CONTAINING 7                                                                            |
| 22984  | PDCD11  | PDCD11    | PROGRAMMED CELL DEATH 11                                                                                     |
| 9124   | PDLIM1  | PDLIM1    | PDZ AND LIM DOMAIN 1 (ELFIN)                                                                                 |
| 8572   | PDLIM4  | PDLIM4    | PDZ AND LIM DOMAIN 4                                                                                         |
| 5178   | PEG3    | PEG3      | PATERNALLY EXPRESSED 3                                                                                       |
| 84528  | PEPP-2  | PEPP-2    | PEPP SUBFAMILY GENE 2                                                                                        |
| 5187   | PER1    | PER1      | PERIOD HOMOLOG 1 (DROSOPHILA)                                                                                |
| 8864   | PER2    | PER2      | PERIOD HOMOLOG 2 (DROSOPHILA)                                                                                |
| 8863   | PER3    | PER3      | PERIOD HOMOLOG 3 (DROSOPHILA)                                                                                |
| 84547  | PGBD1   | PGBD1     | PIGGYBAC TRANSPOSABLE ELEMENT DERIVED 1                                                                      |
| 2074   | ERCOC6  | PGBD3???? | EXCISION REPAIR CROSS-COMPLEMENTING RODENT REPAIR DEFICIENCY, COMPLEMENTATION GROUP 6                        |
| 5241   | PGR     | PGR       | PROGESTERONE RECEPTOR                                                                                        |
| 11331  | PHB2    | PHB2      | PROHIBITIN 2                                                                                                 |
| 5252   | PHF1    | PHF1      | PHD FINGER PROTEIN 1                                                                                         |
| 5274   | PHF10   | PHF10     | PHD FINGER PROTEIN 10                                                                                        |
| 57649  | PHF12   | PHF12     | PHD FINGER PROTEIN 12                                                                                        |
| 148479 | PHF13   | PHF13     | PHD FINGER PROTEIN 13                                                                                        |
| 9678   | PHF14   | PHF14     | PHD FINGER PROTEIN 14                                                                                        |
| 23338  | PHF15   | PHF15     | PHD FINGER PROTEIN 15                                                                                        |
| 9767   | PHF16   | PHF16     | PHD FINGER PROTEIN 16                                                                                        |
| 79960  | PHF17   | PHF17     | PHD FINGER PROTEIN 17                                                                                        |
| 26147  | PHF19   | PHF19     | PHD FINGER PROTEIN 19                                                                                        |
| 5253   | PHF2    | PHF2      | PHD FINGER PROTEIN 2                                                                                         |
| 51230  | PHF20   | PHF20     | PHD FINGER PROTEIN 20                                                                                        |
| 51317  | PHF21A  | PHF21A    | PHD FINGER PROTEIN 21A                                                                                       |
| 112885 | PHF21B  | PHF21B    | PHD FINGER PROTEIN 21B                                                                                       |
| 57117  | PHF22   | PHF22     | PHD FINGER PROTEIN 22                                                                                        |
| 79142  | PHF23   | PHF23     | PHD FINGER PROTEIN 23                                                                                        |
| 23469  | PHF3    | PHF3      | PHD FINGER PROTEIN 3                                                                                         |
| 84844  | PHF5A   | PHF5A     | PHD FINGER PROTEIN 5A                                                                                        |
| 84295  | PHF6    | PHF6      | PHD FINGER PROTEIN 6                                                                                         |
| 51533  | PHF7    | PHF7      | PHD FINGER PROTEIN 7                                                                                         |
| 23133  | PHF8    | PHF8      | PHD FINGER PROTEIN 8                                                                                         |
| 401    | PHOX2A  | PHOX2A    | PAIRED-LIKE (ARISTALESS) HOMEBOX 2A                                                                          |
| 8929   | PHOX2B  | PHOX2B    | PAIRED-LIKE HOMEBOX 2B                                                                                       |
| 10745  | PHTF1   | PHTF1     | POTENTIAL HOMEODOMAIN TRANSCRIPTION FACTOR 1                                                                 |
| 8554   | PIAS1   | PIAS1     | PROTEIN INHIBITOR OF ACTIVATED STAT, 1                                                                       |
| 9063   | PIAS2   | PIAS2     | PROTEIN INHIBITOR OF ACTIVATED STAT, 2                                                                       |
| 10401  | PIAS3   | PIAS3     | PROTEIN INHIBITOR OF ACTIVATED STAT, 3                                                                       |
| 51588  | PIAS4   | PIAS4     | PROTEIN INHIBITOR OF ACTIVATED STAT, 4                                                                       |
| 8544   | PIR     | PIR       | PIRIN (IRON-BINDING NUCLEAR PROTEIN)                                                                         |
| 5307   | PITX1   | PITX1     | PAIRED-LIKE HOMEODOMAIN TRANSCRIPTION FACTOR 1                                                               |
| 5308   | PITX2   | PITX2     | PAIRED-LIKE HOMEODOMAIN TRANSCRIPTION FACTOR 2                                                               |
| 5309   | PITX3   | PITX3     | PAIRED-LIKE HOMEODOMAIN TRANSCRIPTION FACTOR 3                                                               |
| 5316   | PKNOX1  | PKNOX1    | PBX-KNOTTED 1 HOMEBOX 1                                                                                      |
| 63876  | PKNOX2  | PKNOX2    | PBX-KNOTTED 1 HOMEBOX 2                                                                                      |
| 5324   | PLAG1   | PLAG1     | PLEIOMORPHIC ADENOMA GENE 1                                                                                  |
| 5325   | PLAGL1  | PLAGL1    | PLEIOMORPHIC ADENOMA GENE-LIKE 1                                                                             |
| 5326   | PLAGL2  | PLAGL2    | PLEIOMORPHIC ADENOMA GENE-LIKE 2                                                                             |
| 5356   | PLRG1   | PLRG1     | PLEIOTROPIC REGULATOR 1 (PRL1 HOMOLOG, ARABIDOPSIS)                                                          |
| 5371   | PML     | PML       | PROMYELOCYTIC LEUKEMIA                                                                                       |
| 5378   | PMS1    | PMS1      | PMS1 POSTMEIOTIC SEGREGATION INCREASED 1 (S. CEREVISIAE)                                                     |
| 5387   | PMS2L3  | PMS2L3    | POSTMEIOTIC SEGREGATION INCREASED 2-LIKE 3                                                                   |



|        |          |          |                                                                                                                                      |
|--------|----------|----------|--------------------------------------------------------------------------------------------------------------------------------------|
| 5411   | PNN      | PNN      | PININ, DESMOSOME ASSOCIATED PROTEIN                                                                                                  |
| 55629  | PNRC2    | PNRC2    | PROLINE-RICH NUCLEAR RECEPTOR COACTIVATOR 2                                                                                          |
| 57645  | POGK     | POGK     | POGO TRANSPOSABLE ELEMENT WITH KRAB DOMAIN                                                                                           |
| 25885  | POLR1A   | POLR1A   | POLYMERASE (RNA I) POLYPEPTIDE A, 194KDA                                                                                             |
| 84172  | POLR1B   | POLR1B   | POLYMERASE (RNA I) POLYPEPTIDE B, 194KDA                                                                                             |
| 9533   | POLR1C   | POLR1C   | POLYMERASE (RNA I) POLYPEPTIDE C, 30KDA                                                                                              |
| 51082  | POLR1D   | POLR1D   | POLYMERASE (RNA I) POLYPEPTIDE D, 16KDA                                                                                              |
| 64425  | POLR1E   | POLR1E   | POLYMERASE (RNA I) ASSOCIATED FACTOR 1                                                                                               |
| 5430   | POLR2A   | POLR2A   | POLYMERASE (RNA II) (DNA DIRECTED) POLYPEPTIDE A, 220KDA                                                                             |
| 5431   | POLR2B   | POLR2B   | POLYMERASE (RNA II) (DNA DIRECTED) POLYPEPTIDE B, 140KDA                                                                             |
| 5432   | POLR2C   | POLR2C   | POLYMERASE (RNA II) (DNA DIRECTED) POLYPEPTIDE C, 33KDA                                                                              |
| 5433   | POLR2D   | POLR2D   | POLYMERASE (RNA II) (DNA DIRECTED) POLYPEPTIDE D                                                                                     |
| 5434   | POLR2E   | POLR2E   | POLYMERASE (RNA II) (DNA DIRECTED) POLYPEPTIDE E, 25KDA                                                                              |
| 5435   | POLR2F   | POLR2F   | POLYMERASE (RNA II) (DNA DIRECTED) POLYPEPTIDE F                                                                                     |
| 5436   | POLR2G   | POLR2G   | POLYMERASE (RNA II) (DNA DIRECTED) POLYPEPTIDE G                                                                                     |
| 5437   | POLR2H   | POLR2H   | POLYMERASE (RNA II) (DNA DIRECTED) POLYPEPTIDE H                                                                                     |
| 5438   | POLR2I   | POLR2I   | POLYMERASE (RNA II) (DNA DIRECTED) POLYPEPTIDE I, 14.5KDA                                                                            |
| 5439   | POLR2J   | POLR2J   | POLYMERASE (RNA II) (DNA DIRECTED) POLYPEPTIDE J, 13.3KDA                                                                            |
| 246721 | POLR2J2  | POLR2J3  | DNA DIRECTED RNA POLYMERASE II POLYPEPTIDE J-RELATED GENE                                                                            |
| 5440   | POLR2K   | POLR2K   | POLYMERASE (RNA II) (DNA DIRECTED) POLYPEPTIDE K, 7.0KDA                                                                             |
| 5441   | POLR2L   | POLR2L   | POLYMERASE (RNA II) (DNA DIRECTED) POLYPEPTIDE L, 7.6KDA                                                                             |
| 11128  | POLR3A   | POLR3A   | POLYMERASE (RNA III) (DNA DIRECTED) POLYPEPTIDE A, 155KDA                                                                            |
| 57033  | POLR3B   | POLR3B   | POLYMERASE (RNA III) (DNA DIRECTED) POLYPEPTIDE B                                                                                    |
| 10623  | POLR3C   | POLR3C   | POLYMERASE (RNA III) (DNA DIRECTED) POLYPEPTIDE C (82KD)                                                                             |
| 661    | POLR3D   | POLR3D   | POLYMERASE (RNA III) (DNA DIRECTED) POLYPEPTIDE D, 44KDA                                                                             |
| 55718  | POLR3E   | POLR3E   | POLYMERASE (RNA III) (DNA DIRECTED) POLYPEPTIDE E (80KD)                                                                             |
| 10621  | POLR3F   | POLR3F   | POLYMERASE (RNA III) (DNA DIRECTED) POLYPEPTIDE F, 39 KDA                                                                            |
| 171568 | POLR3H   | POLR3H   | POLYMERASE (RNA III) (DNA DIRECTED) POLYPEPTIDE H (22.9KD)                                                                           |
| 51728  | POLR3K   | POLR3K   | POLYMERASE (RNA III) (DNA DIRECTED) POLYPEPTIDE K, 12.3 KDA                                                                          |
| 5449   | POUIF1   | POUIF1   | POU DOMAIN, CLASS 1, TRANSCRIPTION FACTOR 1 (PIT1, GROWTH HORMONE FACTOR 1)                                                          |
| 5450   | POUZAF1  | POUZAF1  | POU DOMAIN, CLASS 2, ASSOCIATING FACTOR 1                                                                                            |
| 5451   | POUZF1   | POUZF1   | POU DOMAIN, CLASS 2, TRANSCRIPTION FACTOR 1                                                                                          |
| 5452   | POUZF2   | POUZF2   | POU DOMAIN, CLASS 2, TRANSCRIPTION FACTOR 2                                                                                          |
| 25833  | POUZF3   | POUZF3   | POU DOMAIN, CLASS 2, TRANSCRIPTION FACTOR 3                                                                                          |
| 5453   | POU3F1   | POU3F1   | POU DOMAIN, CLASS 3, TRANSCRIPTION FACTOR 1                                                                                          |
| 5454   | POU3F2   | POU3F2   | POU DOMAIN, CLASS 3, TRANSCRIPTION FACTOR 2                                                                                          |
| 5455   | POU3F3   | POU3F3   | POU DOMAIN, CLASS 3, TRANSCRIPTION FACTOR 3                                                                                          |
| 5456   | POU3F4   | POU3F4   | POU DOMAIN, CLASS 3, TRANSCRIPTION FACTOR 4                                                                                          |
| 5457   | POU4F1   | POU4F1   | POU DOMAIN, CLASS 4, TRANSCRIPTION FACTOR 1                                                                                          |
| 5458   | POU4F2   | POU4F2   | POU DOMAIN, CLASS 4, TRANSCRIPTION FACTOR 2                                                                                          |
| 5459   | POU4F3   | POU4F3   | POU DOMAIN, CLASS 4, TRANSCRIPTION FACTOR 3                                                                                          |
| 5460   | POU5F1   | POU5F1   | POU DOMAIN, CLASS 5, TRANSCRIPTION FACTOR 1                                                                                          |
| 5462   | POU5F1P1 | POU5F1P1 | POU DOMAIN, CLASS 5, TRANSCRIPTION FACTOR 1 PSEUDOGENE 1                                                                             |
| 134187 | FLJ25680 | POU5F2   | POU domain class 5, transcription factor 2                                                                                           |
| 5463   | POU6F1   | POU6F1   | POU DOMAIN, CLASS 6, TRANSCRIPTION FACTOR 1                                                                                          |
| 11281  | POU6F2   | POU6F2   | POU DOMAIN, CLASS 6, TRANSCRIPTION FACTOR 2                                                                                          |
| 56342  | PPAN     | PPAN     | PETER PAN HOMOLOG (DROSOPHILA)                                                                                                       |
| 5465   | PPARA    | PPARA    | PEROXISOME PROLIFERATIVE ACTIVATED RECEPTOR, ALPHA                                                                                   |
| 5469   | PPARBP   | PPARBP   | PPAR BINDING PROTEIN                                                                                                                 |
| 5467   | PPARD    | PPARD    | PEROXISOME PROLIFERATIVE ACTIVATED RECEPTOR, DELTA                                                                                   |
| 5468   | PPARG    | PPARG    | PEROXISOME PROLIFERATIVE ACTIVATED RECEPTOR, GAMMA                                                                                   |
| 10891  | PPARGC1A | PPARGC1A | PEROXISOME PROLIFERATIVE ACTIVATED RECEPTOR, GAMMA, COACTIVATOR 1, ALPHA                                                             |
| 133522 | PPARGC1B | PPARGC1B | PEROXISOME PROLIFERATIVE ACTIVATED RECEPTOR, GAMMA, COACTIVATOR 1, BETA                                                              |
| 10084  | PQBP1    | PQBP1    | POLYGLUTAMINE BINDING PROTEIN 1                                                                                                      |
| 639    | PRDM1    | PRDM1    | PR DOMAIN CONTAINING 1, WITH ZNF DOMAIN                                                                                              |
| 56980  | PRDM10   | PRDM10   | PR DOMAIN CONTAINING 10                                                                                                              |
| 59335  | PRDM12   | PRDM12   | PR DOMAIN CONTAINING 12                                                                                                              |
| 59336  | PRDM13   | PRDM13   | PR DOMAIN CONTAINING 13                                                                                                              |
| 63978  | PRDM14   | PRDM14   | PR DOMAIN CONTAINING 14                                                                                                              |
| 63976  | PRDM16   | PRDM16   | PR DOMAIN CONTAINING 16                                                                                                              |
| 7799   | PRDM2    | PRDM2    | PR DOMAIN CONTAINING 2, WITH ZNF DOMAIN                                                                                              |
| 11108  | PRDM4    | PRDM4    | PR DOMAIN CONTAINING 4                                                                                                               |
| 11107  | PRDM5    | PRDM5    | PR DOMAIN CONTAINING 5                                                                                                               |
| 93166  | PRDM6    | PRDM6    | PR DOMAIN CONTAINING 6                                                                                                               |
| 11105  | PRDM7    | PRDM7    | PR DOMAIN CONTAINING 7                                                                                                               |
| 56978  | PRDM8    | PRDM8    | PR DOMAIN CONTAINING 8                                                                                                               |
| 56979  | PRDM9    | PRDM9    | PR DOMAIN CONTAINING 9                                                                                                               |
| 10113  | PREB     | PREB     | PROLACTIN REGULATORY ELEMENT BINDING                                                                                                 |
| 85441  | PRIC285  | PRIC285  | PEROXISOMAL PROLIFERATOR-ACTIVATED RECEPTOR A INTERACTING COMPLEX 285                                                                |
| 5626   | PROP1    | PROP1    | PROPHET OF PIT1, PAIRED-LIKE HOMEODOMAIN TRANSCRIPTION FACTOR                                                                        |
| 5629   | PROX1    | PROX1    | PROSPERO-RELATED HOMEODOMAIN 1                                                                                                       |
| 8399   | PRPF4B   | PRPF4B   | PRP4-PRP8 RNA PROCESSING FACTOR 4 HOMOLOG B (YEAST)                                                                                  |
| 5396   | PRRX1    | PRRX1    | PAIRED RELATED HOMEODOMAIN 1                                                                                                         |
| 51450  | PRRX2    | PRRX2    | PAIRED RELATED HOMEODOMAIN 2                                                                                                         |
| 11168  | PSIP1    | PSIP1    | PC4 AND SFRS1 INTERACTING PROTEIN 1                                                                                                  |
| 256297 | PTF1A    | PTF1A    | PANCREAS SPECIFIC TRANSCRIPTION FACTOR, 1A                                                                                           |
| 5757   | PTMA     | PTMA     | PROTHYMOSIN, ALPHA (GENE SEQUENCE 28)                                                                                                |
| 284119 | PTRF     | PTRF     | POLYMERASE I AND TRANSCRIPT RELEASE FACTOR                                                                                           |
| 9232   | PTTG1    | PTTG1    | PITUITARY TUMOR-TRANSFORMING 1                                                                                                       |
| 5813   | PURA     | PURA     | PURINE-RICH ELEMENT BINDING PROTEIN A                                                                                                |
| 11137  | PWP1     | PWP1     | PWP1 HOMOLOG (S. CEREVISIAE)                                                                                                         |
| 51547  | PYCR1    | PYCR1    | PYRROLINE-5-CARBOXYLATE REDUCTASE 1                                                                                                  |
| 26108  | PYGO1    | PYGO1    | PYGOPUS HOMOLOG 1 (DROSOPHILA)                                                                                                       |
| 90780  | PYGO2    | PYGO2    | PYGOPUS HOMOLOG 2 (DROSOPHILA)                                                                                                       |
| 5888   | RAD51    | RAD51    | RAD51 HOMOLOG (RECA HOMOLOG, E. COLI) (S. CEREVISIAE)                                                                                |
| 5890   | RAD51L1  | RAD51L1  | RAD51-LIKE 1 (S. CEREVISIAE)                                                                                                         |
| 25788  | RAD54B   | RAD54B   | FIBRINOGEN SILENCER BINDING PROTEIN                                                                                                  |
| 10743  | RAI1     | RAI1     | RETINOIC ACID INDUCED 1                                                                                                              |
| 26064  | RAI14    | RAI14    | RETINOIC ACID INDUCED 14                                                                                                             |
| 51720  | RAP80    | RAP80    | RECEPTOR ASSOCIATED PROTEIN 80                                                                                                       |
| 5914   | RARA     | RARA     | RETINOIC ACID RECEPTOR, ALPHA                                                                                                        |
| 5915   | RARB     | RARB     | RETINOIC ACID RECEPTOR, BETA                                                                                                         |
| 5916   | RARG     | RARG     | RETINOIC ACID RECEPTOR, GAMMA                                                                                                        |
| 30082  | RAX      | RAX      | RETINA AND ANTERIOR NEURAL FOLD HOMEODOMAIN                                                                                          |
| 84839  | RAXL1    | RAXL1    | RETINA AND ANTERIOR NEURAL FOLD HOMEODOMAIN LIKE 1                                                                                   |
| 5925   | RB1      | RB1      | RETINOBLASTOMA 1 (INCLUDING OSTEOSARCOMA)                                                                                            |
| 57786  | RBAK     | RBAK     | RB-ASSOCIATED KRAB REPRESSOR                                                                                                         |
| 5928   | RBBP4    | RBBP4    | RETINOBLASTOMA BINDING PROTEIN 4                                                                                                     |
| 5931   | RBBP7    | RBBP7    | RETINOBLASTOMA BINDING PROTEIN 7                                                                                                     |
| 10616  | C20orf18 | RBCK1    | RanBP-type and C3HC4-type zinc finger containing 1                                                                                   |
| 5933   | RBL1     | RBL1     | RETINOBLASTOMA-LIKE 1 (P107)                                                                                                         |
| 5934   | RBL2     | RBL2     | RETINOBLASTOMA-LIKE 2 (P130)                                                                                                         |
| 10432  | RBM14    | RBM14    | RNA BINDING MOTIF PROTEIN 14                                                                                                         |
| 64783  | RBM15    | RBM15    | RNA BINDING MOTIF PROTEIN 15                                                                                                         |
| 29890  | RBM15B   | RBM15B   | RNA BINDING MOTIF PROTEIN 15B                                                                                                        |
| 22828  | RBM16    | RBM16    | RNA BINDING MOTIF PROTEIN 16                                                                                                         |
| 10179  | RBM7     | RBM7     | RNA BINDING MOTIF PROTEIN 7                                                                                                          |
| 23543  | RBM9     | RBM9     | RNA BINDING MOTIF PROTEIN 9                                                                                                          |
| 27316  | RBMX     | RBMX     | RNA BINDING MOTIF PROTEIN, X-LINKED                                                                                                  |
| 3516   | RBPSUH   | RBPSUH   | RECOMBINING BINDING PROTEIN SUPPRESSOR OF HAIRLESS (DROSOPHILA)                                                                      |
| 11317  | RCOR2L   | RCOR2L   | RECOMBINING BINDING PROTEIN SUPPRESSOR OF HAIRLESS (DROSOPHILA)-LIKE                                                                 |
| 283248 | RCOR2    | RCOR2    | REST COREPRESSOR 2                                                                                                                   |
| 7936   | RD5P     | RD5P     | RD RNA BINDING PROTEIN                                                                                                               |
| 5966   | REL      | REL      | V-REL RETICULOENDOTHELIOSIS VIRAL ONCOGENE HOMOLOG (AVIAN)                                                                           |
| 5970   | RELA     | RELA     | V-REL RETICULOENDOTHELIOSIS VIRAL ONCOGENE HOMOLOG A, NUCLEAR FACTOR OF KAPPA LIGHT POLYPEPTIDE GENE ENHANCER IN B-CELLS 3, P65 (AV) |
| 5971   | RELB     | RELB     | V-REL RETICULOENDOTHELIOSIS VIRAL ONCOGENE HOMOLOG B, NUCLEAR FACTOR OF KAPPA LIGHT POLYPEPTIDE GENE ENHANCER IN B-CELLS 3 (AVIAN)   |
| 473    | RERE     | RERE     | ARGININE-GLUTAMIC ACID DIPEPTIDE (RE) REPEATS                                                                                        |
| 5978   | REST     | REST     | RE1-SILENCING TRANSCRIPTION FACTOR                                                                                                   |
| 57109  | REXO4    | REXO4    | REX4, RNA EXONUCLEASE 4 HOMOLOG (S. CEREVISIAE)                                                                                      |
| 5981   | RFC1     | RFC1     | REPLICATION FACTOR C (ACTIVATOR 1), 1, 145KDA                                                                                        |
| 5987   | RF1      | RF1      | RET FINGER PROTEIN                                                                                                                   |
| 5989   | RFX1     | RFX1     | REGULATORY FACTOR X, 1 (INFLUENCES HLA CLASS II EXPRESSION)                                                                          |
| 5990   | RFX2     | RFX2     | REGULATORY FACTOR X, 2 (INFLUENCES HLA CLASS II EXPRESSION)                                                                          |
| 5991   | RFX3     | RFX3     | REGULATORY FACTOR X, 3 (INFLUENCES HLA CLASS II EXPRESSION)                                                                          |
| 5992   | RFX4     | RFX4     | REGULATORY FACTOR X, 4 (INFLUENCES HLA CLASS II EXPRESSION)                                                                          |
| 5993   | RFX5     | RFX5     | REGULATORY FACTOR X, 5 (INFLUENCES HLA CLASS II EXPRESSION)                                                                          |
| 8625   | RFXANK   | RFXANK   | REGULATORY FACTOR X-ASSOCIATED ANKYRIN-CONTAINING PROTEIN                                                                            |
| 5994   | RFXAP    | RFXAP    | REGULATORY FACTOR X-ASSOCIATED PROTEIN                                                                                               |
| 222546 | RFXDC1   | RFXDC1   | REGULATORY FACTOR X DOMAIN CONTAINING 1                                                                                              |

|        |               |               |                                                                                                                 |
|--------|---------------|---------------|-----------------------------------------------------------------------------------------------------------------|
| 64864  | RFXDC2        | RFXDC2        | REGULATORY FACTOR X DOMAIN CONTAINING 2                                                                         |
| 10636  | RGS14         | RGS14         | REGULATOR OF G-PROTEIN SIGNALING 14                                                                             |
| 6015   | RING1         | RING1         | RING FINGER PROTEIN 1                                                                                           |
| 6018   | RLF           | RLF           | REARRANGED L-MYC FUSION                                                                                         |
| 51132  | RNF12         | RNF12         | RING FINGER PROTEIN 12                                                                                          |
| 9604   | RNF14         | RNF14         | RING FINGER PROTEIN 14                                                                                          |
| 50862  | RNF141        | RNF141        | RING FINGER PROTEIN 141                                                                                         |
| 25897  | RNF19         | RNF19         | RING FINGER PROTEIN 19                                                                                          |
| 6045   | RNF2          | RNF2          | RING FINGER PROTEIN 2                                                                                           |
| 10379  | ISGF3G        | RNF31         | INTERFERON-STIMULATED TRANSCRIPTION FACTOR 3, GAMMA 48KDA                                                       |
| 6047   | RNF4          | RNF4          | RING FINGER PROTEIN 4                                                                                           |
| 6049   | RNF6          | RNF6          | RING FINGER PROTEIN (C3H2C3 TYPE) 6                                                                             |
| 9584   | RNP22         | RNP22         | RNA-BINDING REGION (RNP1, RRM) CONTAINING 2                                                                     |
| 10921  | RNPS1         | RNPS1         | RNA BINDING PROTEIN S1, SERINE-RICH DOMAIN                                                                      |
| 6095   | RORA          | RORA          | RAR-RELATED ORPHAN RECEPTOR A                                                                                   |
| 6096   | RORB          | RORB          | RAR-RELATED ORPHAN RECEPTOR B                                                                                   |
| 6097   | RORC          | RORC          | RAR-RELATED ORPHAN RECEPTOR C                                                                                   |
| 286380 | RP11-561O23.3 | RP11-561O23.3 | FOXQ4-LIKE 2                                                                                                    |
| 8227   | RP13-297E16.1 | RP13-297E16.1 | DNA SEGMENT ON CHROMOSOME X AND Y (UNIQUE) 155 EXPRESSED SEQUENCE, ISOFORM 1                                    |
| 6239   | RREB1         | RREB1         | RAS RESPONSIVE ELEMENT BINDING PROTEIN 1                                                                        |
| 861    | RUNX1         | RUNX1         | RUNT-RELATED TRANSCRIPTION FACTOR 1 (ACUTE MYELOID LEUKEMIA 1; AML1 ONCOGENE)                                   |
| 862    | RUNX1T1       | RUNX1T1       | RUNT-RELATED TRANSCRIPTION FACTOR 1; TRANSLOCATED TO, 1 (CYCLIN D-RELATED)                                      |
| 860    | RUNX2         | RUNX2         | RUNT-RELATED TRANSCRIPTION FACTOR 2                                                                             |
| 864    | RUNX3         | RUNX3         | RUNT-RELATED TRANSCRIPTION FACTOR 3                                                                             |
| 8607   | RUVBL1        | RUVBL1        | RUVB-LIKE 1 (E. COLI)                                                                                           |
| 10856  | RUVBL2        | RUVBL2        | RUVB-LIKE 2 (E. COLI)                                                                                           |
| 6256   | RXRA          | RXRA          | RETINOID X RECEPTOR, ALPHA                                                                                      |
| 6257   | RXRB          | RXRB          | RETINOID X RECEPTOR, BETA                                                                                       |
| 6258   | RXRG          | RXRG          | RETINOID X RECEPTOR, GAMMA                                                                                      |
| 11017  | RY1           | RY1           | PUTATIVE NUCLEIC ACID BINDING PROTEIN RY-1                                                                      |
| 23429  | RYBP          | RYBP          | RING1 AND YY1 BINDING PROTEIN                                                                                   |
| 6294   | SAFB          | SAFB          | SCAFFOLD ATTACHMENT FACTOR B                                                                                    |
| 9667   | SAFB2         | SAFB2         | SCAFFOLD ATTACHMENT FACTOR B2                                                                                   |
| 286749 | SALF          | SALF          | STONIN 1                                                                                                        |
| 6299   | SALL1         | SALL1         | SAL-LIKE 1 (DROSOPHILA)                                                                                         |
| 6297   | SALL2         | SALL2         | SAL-LIKE 2 (DROSOPHILA)                                                                                         |
| 27164  | SALL3         | SALL3         | SAL-LIKE 3 (DROSOPHILA)                                                                                         |
| 57167  | SALL4         | SALL4         | SAL-LIKE 4 (DROSOPHILA)                                                                                         |
| 10284  | SAP18         | SAP18         | SIN3A-ASSOCIATED PROTEIN, 18KDA                                                                                 |
| 8819   | SAP30         | SAP30         | SIN3A-ASSOCIATED PROTEIN, 30KDA                                                                                 |
| 29115  | SAP30BP       | SAP30BP       | SAP30 BINDING PROTEIN                                                                                           |
| 6304   | SATB1         | SATB1         | SPECIAL, AT-RICH SEQUENCE BINDING PROTEIN 1 (BINDS TO NUCLEAR MATRIX/SCAFFOLD-ASSOCIATING DNAs)                 |
| 23314  | SATB2         | SATB2         | SATB FAMILY MEMBER 2                                                                                            |
| 51282  | SCAND1        | SCAND1        | SCAN DOMAIN CONTAINING 1                                                                                        |
| 54581  | SCAND2        | SCAND2        | SCAN DOMAIN CONTAINING 2                                                                                        |
| 22955  | SCMH1         | SCMH1         | SEX COMB ON MIDLEG HOMOLOG 1 (DROSOPHILA)                                                                       |
| 6322   | SCML1         | SCML1         | SEX COMB ON MIDLEG-LIKE 1 (DROSOPHILA)                                                                          |
| 10389  | SCML2         | SCML2         | SEX COMB ON MIDLEG-LIKE 2 (DROSOPHILA)                                                                          |
| 83482  | SCRT1         | SCRT1         | SCRATCH HOMOLOG 1, ZINC FINGER PROTEIN (DROSOPHILA)                                                             |
| 85508  | SCRT2         | SCRT2         | SCRATCH HOMOLOG 2, ZINC FINGER PROTEIN (DROSOPHILA)                                                             |
| 23541  | SEC14L2       | SEC14L2       | SEC14-LIKE 2 (S. CEREVISIAE)                                                                                    |
| 29950  | SERTAD1       | SERTAD1       | SERTA DOMAIN CONTAINING 1                                                                                       |
| 9792   | SERTAD2       | SERTAD2       | SERTA DOMAIN CONTAINING 2                                                                                       |
| 29946  | SERTAD3       | SERTAD3       | SERTA DOMAIN CONTAINING 3                                                                                       |
| 26040  | SETBP1        | SETBP1        | SET BINDING PROTEIN 1                                                                                           |
| 7536   | SF1           | SF1           | SPLICING FACTOR 1                                                                                               |
| 57794  | SF4           | SF4           | SPLICING FACTOR 4                                                                                               |
| 51460  | SFMBT1        | SFMBT1        | Scm-like with four mbt domains 1                                                                                |
| 6421   | SFPQ          | SFPQ          | SPLICING FACTOR PROLINE/GLUTAMINE-RICH (POLYPYRIMIDINE TRACT BINDING PROTEIN ASSOCIATED)                        |
| 6426   | SFRS1         | SFRS1         | SPLICING FACTOR, ARGININE/SERINE-RICH 1 (SPLICING FACTOR 2, ALTERNATE SPLICING FACTOR)                          |
| 10147  | SFRS14        | SFRS14        | SPLICING FACTOR, ARGININE/SERINE-RICH 14                                                                        |
| 11129  | SFRS16        | SFRS16        | SPLICING FACTOR, ARGININE/SERINE-RICH 16 (SUPPRESSOR-OF-WHITE-APRICOT HOMOLOG, DROSOPHILA)                      |
| 6427   | SFRS2         | SFRS2         | SPLICING FACTOR, ARGININE/SERINE-RICH 2                                                                         |
| 6428   | SFRS3         | SFRS3         | SPLICING FACTOR, ARGININE/SERINE-RICH 3                                                                         |
| 6430   | SFRS5         | SFRS5         | SPLICING FACTOR, ARGININE/SERINE-RICH 5                                                                         |
| 6431   | SFRS6         | SFRS6         | SPLICING FACTOR, ARGININE/SERINE-RICH 6                                                                         |
| 6433   | SFRS8         | SFRS8         | SPLICING FACTOR, ARGININE/SERINE-RICH 8 (SUPPRESSOR-OF-WHITE-APRICOT HOMOLOG, DROSOPHILA)                       |
| 8683   | SFRS9         | SFRS9         | SPLICING FACTOR, ARGININE/SERINE-RICH 9                                                                         |
| 9646   | SH2BP1        | SH2BP1        | SH2 DOMAIN BINDING PROTEIN 1 (TETRATRICOPEPTIDE REPEAT CONTAINING)                                              |
| 6473   | SHOX          | SHOX          | SHORT STATURE HOMEBOX                                                                                           |
| 6474   | SHOX2         | SHOX2         | SHORT STATURE HOMEBOX 2                                                                                         |
| 257218 | SIM1RH        | SIM1RH        | SNF2 HISTONE LINKER PHD RING HELICASE                                                                           |
| 6492   | SIM1          | SIM1          | SINGLE-MINDED HOMOLOG 1 (DROSOPHILA)                                                                            |
| 6493   | SIM2          | SIM2          | SINGLE-MINDED HOMOLOG 2 (DROSOPHILA)                                                                            |
| 25942  | SIN3A         | SIN3A         | SIN3 HOMOLOG A, TRANSCRIPTION REGULATOR (YEAST)                                                                 |
| 23309  | SIN3B         | SIN3B         | SIN3 HOMOLOG B, TRANSCRIPTION REGULATOR (YEAST)                                                                 |
| 23411  | SIRT1         | SIRT1         | SIRTUIN (SILENT MATING TYPE INFORMATION REGULATION 2 HOMOLOG) 1 (S. CEREVISIAE)                                 |
| 22933  | SIRT2         | SIRT2         | SIRTUIN (SILENT MATING TYPE INFORMATION REGULATION 2 HOMOLOG) 2 (S. CEREVISIAE)                                 |
| 23410  | SIRT3         | SIRT3         | SIRTUIN (SILENT MATING TYPE INFORMATION REGULATION 2 HOMOLOG) 3 (S. CEREVISIAE)                                 |
| 23409  | SIRT4         | SIRT4         | SIRTUIN (SILENT MATING TYPE INFORMATION REGULATION 2 HOMOLOG) 4 (S. CEREVISIAE)                                 |
| 23408  | SIRT5         | SIRT5         | SIRTUIN (SILENT MATING TYPE INFORMATION REGULATION 2 HOMOLOG) 5 (S. CEREVISIAE)                                 |
| 6495   | SIX1          | SIX1          | SINE OCULIS HOMEBOX HOMOLOG 1 (DROSOPHILA)                                                                      |
| 10736  | SIX2          | SIX2          | SINE OCULIS HOMEBOX HOMOLOG 2 (DROSOPHILA)                                                                      |
| 6496   | SIX3          | SIX3          | SINE OCULIS HOMEBOX HOMOLOG 3 (DROSOPHILA)                                                                      |
| 51804  | SIX4          | SIX4          | SINE OCULIS HOMEBOX HOMOLOG 4 (DROSOPHILA)                                                                      |
| 147912 | SIX5          | SIX5          | SINE OCULIS HOMEBOX HOMOLOG 5 (DROSOPHILA)                                                                      |
| 4990   | SIX6          | SIX6          | SINE OCULIS HOMEBOX HOMOLOG 6 (DROSOPHILA)                                                                      |
| 6497   | SKI           | SKI           | V-SKI SARCOMA VIRAL ONCOGENE HOMOLOG (AVIAN)                                                                    |
| 6498   | SKIL          | SKIL          | SKI-LIKE                                                                                                        |
| 84174  | SLA2          | SLA2          | SRC-LIKE-ADAPTOR 2                                                                                              |
| 56731  | SLC2A4RG      | SLC2A4RG      | SLC2A4 REGULATOR                                                                                                |
| 4086   | SMAD1         | SMAD1         | SMAD, MOTHERS AGAINST DPP HOMOLOG 1 (DROSOPHILA)                                                                |
| 4087   | SMAD2         | SMAD2         | SMAD, MOTHERS AGAINST DPP HOMOLOG 2 (DROSOPHILA)                                                                |
| 4088   | SMAD3         | SMAD3         | SMAD, MOTHERS AGAINST DPP HOMOLOG 3 (DROSOPHILA)                                                                |
| 4089   | SMAD4         | SMAD4         | SMAD, MOTHERS AGAINST DPP HOMOLOG 4 (DROSOPHILA)                                                                |
| 4090   | SMAD5         | SMAD5         | SMAD, MOTHERS AGAINST DPP HOMOLOG 5 (DROSOPHILA)                                                                |
| 4091   | SMAD6         | SMAD6         | SMAD, MOTHERS AGAINST DPP HOMOLOG 6 (DROSOPHILA)                                                                |
| 4092   | SMAD7         | SMAD7         | SMAD, MOTHERS AGAINST DPP HOMOLOG 7 (DROSOPHILA)                                                                |
| 4093   | SMAD9         | SMAD9         | SMAD, MOTHERS AGAINST DPP HOMOLOG 9 (DROSOPHILA)                                                                |
| 6594   | SMARCA1       | SMARCA1       | SWI/SNF RELATED, MATRIX ASSOCIATED, ACTIN DEPENDENT REGULATOR OF CHROMATIN, SUBFAMILY A, MEMBER 1               |
| 6595   | SMARCA2       | SMARCA2       | SWI/SNF RELATED, MATRIX ASSOCIATED, ACTIN DEPENDENT REGULATOR OF CHROMATIN, SUBFAMILY A, MEMBER 2               |
| 6596   | SMARCA3       | SMARCA3       | SWI/SNF RELATED, MATRIX ASSOCIATED, ACTIN DEPENDENT REGULATOR OF CHROMATIN, SUBFAMILY A, MEMBER 3               |
| 6597   | SMARCA4       | SMARCA4       | SWI/SNF RELATED, MATRIX ASSOCIATED, ACTIN DEPENDENT REGULATOR OF CHROMATIN, SUBFAMILY A, MEMBER 4               |
| 8467   | SMARCA5       | SMARCA5       | SWI/SNF RELATED, MATRIX ASSOCIATED, ACTIN DEPENDENT REGULATOR OF CHROMATIN, SUBFAMILY A, MEMBER 5               |
| 56916  | SMARCAD1      | SMARCAD1      | SWI/SNF-RELATED, MATRIX-ASSOCIATED ACTIN-DEPENDENT REGULATOR OF CHROMATIN, SUBFAMILY A, CONTAINING DEAD/H BOX 1 |
| 6598   | SMARCB1       | SMARCB1       | SWI/SNF RELATED, MATRIX ASSOCIATED, ACTIN DEPENDENT REGULATOR OF CHROMATIN, SUBFAMILY B, MEMBER 1               |
| 6599   | SMARCC1       | SMARCC1       | SWI/SNF RELATED, MATRIX ASSOCIATED, ACTIN DEPENDENT REGULATOR OF CHROMATIN, SUBFAMILY C, MEMBER 1               |
| 6601   | SMARCC2       | SMARCC2       | SWI/SNF RELATED, MATRIX ASSOCIATED, ACTIN DEPENDENT REGULATOR OF CHROMATIN, SUBFAMILY C, MEMBER 2               |
| 6602   | SMARCD1       | SMARCD1       | SWI/SNF RELATED, MATRIX ASSOCIATED, ACTIN DEPENDENT REGULATOR OF CHROMATIN, SUBFAMILY D, MEMBER 1               |
| 6603   | SMARCD2       | SMARCD2       | SWI/SNF RELATED, MATRIX ASSOCIATED, ACTIN DEPENDENT REGULATOR OF CHROMATIN, SUBFAMILY D, MEMBER 2               |
| 6604   | SMARCD3       | SMARCD3       | SWI/SNF RELATED, MATRIX ASSOCIATED, ACTIN DEPENDENT REGULATOR OF CHROMATIN, SUBFAMILY D, MEMBER 3               |
| 6605   | SMARCE1       | SMARCE1       | SWI/SNF RELATED, MATRIX ASSOCIATED, ACTIN DEPENDENT REGULATOR OF CHROMATIN, SUBFAMILY E, MEMBER 1               |
| 8242   | SMCX          | SMCX          | SMCY HOMOLOG, X-LINKED (MOUSE)                                                                                  |
| 8284   | SMCY          | SMCY          | SMCY HOMOLOG, Y-LINKED (MOUSE)                                                                                  |
| 64750  | SMURF2        | SMURF2        | SMAD SPECIFIC E3 UBIQUITIN PROTEIN LIGASE 2                                                                     |
| 150572 | SMYD1         | SMYD1         | SET AND MYND DOMAIN CONTAINING 1                                                                                |
| 6615   | SNAI1         | SNAI1         | SNAIL HOMOLOG 1 (DROSOPHILA)                                                                                    |
| 6591   | SNAI2         | SNAI2         | SNAIL HOMOLOG 2 (DROSOPHILA)                                                                                    |
| 333929 | SNAI3         | SNAI3         | SNAIL HOMOLOG 3 (DROSOPHILA)                                                                                    |
| 6617   | SNAPC1        | SNAPC1        | SMALL NUCLEAR RNA ACTIVATING COMPLEX, POLYPEPTIDE 1, 43KDA                                                      |
| 6618   | SNAPC2        | SNAPC2        | SMALL NUCLEAR RNA ACTIVATING COMPLEX, POLYPEPTIDE 2, 45KDA                                                      |
| 6619   | SNAPC3        | SNAPC3        | SMALL NUCLEAR RNA ACTIVATING COMPLEX, POLYPEPTIDE 3, 50KDA                                                      |
| 6621   | SNAPC4        | SNAPC4        | SMALL NUCLEAR RNA ACTIVATING COMPLEX, POLYPEPTIDE 4, 190KDA                                                     |
| 10302  | SNAPC5        | SNAPC5        | SMALL NUCLEAR RNA ACTIVATING COMPLEX, POLYPEPTIDE 5, 19KDA                                                      |
| 27044  | SND1          | SND1          | STAPHYLOCOCCAL NUCLEASE DOMAIN CONTAINING 1                                                                     |
| 55509  | SNFT          | SNFT          | JUN DIMERIZATION PROTEIN P21SNFT                                                                                |
| 79753  | SNIP1         | SNIP1         | SMAD NUCLEAR INTERACTING PROTEIN 1                                                                              |
| 6628   | SNRPB         | SNRPB         | SMALL NUCLEAR RIBONUCLEOPROTEIN POLYPEPTIDES B AND B1                                                           |
| 6632   | SNRPD1        | SNRPD1        | SMALL NUCLEAR RIBONUCLEOPROTEIN D1 POLYPEPTIDE 16KDA                                                            |

|        |          |          |                                                                                         |
|--------|----------|----------|-----------------------------------------------------------------------------------------|
| 22938  | SNW1     | SNW1     | SNW DOMAIN CONTAINING 1                                                                 |
| 6650   | SOLH     | SOLH     | SMALL OPTIC LOBES HOMOLOG (DROSOPHILA)                                                  |
| 6656   | SOX1     | SOX1     | SRY (SEX DETERMINING REGION Y)-BOX 1                                                    |
| 6663   | SOX10    | SOX10    | SRY (SEX DETERMINING REGION Y)-BOX 10                                                   |
| 6664   | SOX11    | SOX11    | SRY (SEX DETERMINING REGION Y)-BOX 11                                                   |
| 6666   | SOX12    | SOX12    | SRY (SEX DETERMINING REGION Y)-BOX 12                                                   |
| 9580   | SOX13    | SOX13    | SRY (SEX DETERMINING REGION Y)-BOX 13                                                   |
| 8403   | SOX14    | SOX14    | SRY (SEX DETERMINING REGION Y)-BOX 14                                                   |
| 6665   | SOX15    | SOX15    | SRY (SEX DETERMINING REGION Y)-BOX 15                                                   |
| 64321  | SOX17    | SOX17    | SRY (SEX DETERMINING REGION Y)-BOX 17                                                   |
| 6657   | SOX2     | SOX2     | SRY (SEX DETERMINING REGION Y)-BOX 2                                                    |
| 11166  | SOX21    | SOX21    | SRY (SEX DETERMINING REGION Y)-BOX 21                                                   |
| 6659   | SOX3     | SOX3     | SRY (SEX DETERMINING REGION Y)-BOX 3                                                    |
| 11063  | SOX30    | SOX30    | SRY (SEX DETERMINING REGION Y)-BOX 30                                                   |
| 6659   | SOX4     | SOX4     | SRY (SEX DETERMINING REGION Y)-BOX 4                                                    |
| 6660   | SOX5     | SOX5     | SRY (SEX DETERMINING REGION Y)-BOX 5                                                    |
| 55553  | SOX6     | SOX6     | SRY (SEX DETERMINING REGION Y)-BOX 6                                                    |
| 83595  | SOX7     | SOX7     | SRY (SEX DETERMINING REGION Y)-BOX 7                                                    |
| 30812  | SOX8     | SOX8     | SRY (SEX DETERMINING REGION Y)-BOX 8                                                    |
| 6662   | SOX9     | SOX9     | SRY (SEX DETERMINING REGION Y)-BOX 9 (CAMPOMELIC DYSPLASIA, AUTOSOMAL SEX-REVERSAL)     |
| 6667   | SP1      | SP1      | SP1 TRANSCRIPTION FACTOR                                                                |
| 6672   | SP100    | SP100    | SP100 NUCLEAR ANTIGEN                                                                   |
| 3431   | SP110    | SP110    | SP110 NUCLEAR BODY PROTEIN                                                              |
| 11262  | SP140    | SP140    | SP140 NUCLEAR BODY PROTEIN                                                              |
| 6668   | SP2      | SP2      | SP2 TRANSCRIPTION FACTOR                                                                |
| 6670   | SP3      | SP3      | SP3 TRANSCRIPTION FACTOR                                                                |
| 6671   | SP4      | SP4      | SP4 TRANSCRIPTION FACTOR                                                                |
| 121340 | SP7      | SP7      | SP7 TRANSCRIPTION FACTOR                                                                |
| 221833 | SP8      | SP8      | SP8 TRANSCRIPTION FACTOR                                                                |
| 25803  | SPDEF    | SPDEF    | SAM POINTED DOMAIN CONTAINING ETS TRANSCRIPTION FACTOR                                  |
| 23013  | SPEN     | SPEN     | SPEN HOMOLOG, TRANSCRIPTIONAL REGULATOR (DROSOPHILA)                                    |
| 6688   | SPH1     | SPH1     | SPLEEN FOCUS FORMING VIRUS (SFFV) PROVIRAL INTEGRATION ONCOGENE SPH1                    |
| 6689   | SPB      | SPB      | SPI-B TRANSCRIPTION FACTOR (SPI-1/PU.1 RELATED)                                         |
| 121599 | SPIC     | SPIC     | SPI-C TRANSCRIPTION FACTOR (SPI-1/PU.1 RELATED)                                         |
| 23626  | SPO11    | SPO11    | SPO11 MEIOTIC PROTEIN COVALENTLY BOUND TO DSB-LIKE (S. CEREVISIAE)                      |
| 90853  | SPOCD1   | SPOCD1   | SPOC DOMAIN CONTAINING 1                                                                |
| 84654  | SPZ1     | SPZ1     | SPERMATOGENIC LEUCINE ZIPPER 1                                                          |
| 58506  | SR-A1    | SR-A1    | SERINE ARGININE-RICH PRE-MRNA SPLICING FACTOR SR-A1                                     |
| 10847  | SRCAP    | SRCAP    | SNF2-RELATED CBP ACTIVATOR PROTEIN                                                      |
| 6720   | SREBF1   | SREBF1   | STEROL REGULATORY ELEMENT BINDING TRANSCRIPTION FACTOR 1                                |
| 6721   | SREBF2   | SREBF2   | STEROL REGULATORY ELEMENT BINDING TRANSCRIPTION FACTOR 2                                |
| 6722   | SRE      | SRE      | SERUM RESPONSE FACTOR (C-FOS SERUM RESPONSE ELEMENT-BINDING TRANSCRIPTION FACTOR)       |
| 10929  | SRRP46   | SRRP46   | SPLICING FACTOR, ARGININE/SERINE-RICH, 46KD                                             |
| 10250  | SRRM1    | SRRM1    | SERINE/ARGININE REPETITIVE MATRIX 1                                                     |
| 6736   | SRY      | SRY      | SEX DETERMINING REGION Y                                                                |
| 26039  | SS18L1   | SS18L1   | SYNOVIAL SARCOMA TRANSLOCATION GENE ON CHROMOSOME 18-LIKE 1                             |
| 6741   | SSB      | SSB      | SJOGREN SYNDROME ANTIGEN B (AUTOANTIGEN LA)                                             |
| 23635  | SSBP2    | SSBP2    | SINGLE-STRANDED DNA BINDING PROTEIN 2                                                   |
| 23648  | SSBP3    | SSBP3    | SINGLE STRANDED DNA BINDING PROTEIN 3                                                   |
| 170463 | SSBP4    | SSBP4    | SINGLE STRANDED DNA BINDING PROTEIN 4                                                   |
| 6749   | SSRP1    | SSRP1    | STRUCTURE SPECIFIC RECOGNITION PROTEIN 1                                                |
| 6756   | SSX1     | SSX1     | SYNOVIAL SARCOMA, X BREAKPOINT 1                                                        |
| 6757   | SSX2     | SSX2     | SYNOVIAL SARCOMA, X BREAKPOINT 2                                                        |
| 10214  | SSX3     | SSX3     | SYNOVIAL SARCOMA, X BREAKPOINT 3                                                        |
| 6759   | SSX4     | SSX4     | SYNOVIAL SARCOMA, X BREAKPOINT 4                                                        |
| 6758   | SSX5     | SSX5     | SYNOVIAL SARCOMA, X BREAKPOINT 5                                                        |
| 9705   | ST18     | ST18     | SUPPRESSION OF TUMORIGENICITY 18 (BREAST CARCINOMA) (ZINC FINGER PROTEIN)               |
| 6772   | STAT1    | STAT1    | SIGNAL TRANSDUCER AND ACTIVATOR OF TRANSCRIPTION 1, 91KDA                               |
| 6773   | STAT2    | STAT2    | SIGNAL TRANSDUCER AND ACTIVATOR OF TRANSCRIPTION 2, 113KDA                              |
| 6774   | STAT3    | STAT3    | SIGNAL TRANSDUCER AND ACTIVATOR OF TRANSCRIPTION 3 (ACUTE-PHASE RESPONSE FACTOR)        |
| 6775   | STAT4    | STAT4    | SIGNAL TRANSDUCER AND ACTIVATOR OF TRANSCRIPTION 4                                      |
| 6776   | STAT5A   | STAT5A   | SIGNAL TRANSDUCER AND ACTIVATOR OF TRANSCRIPTION 5A                                     |
| 6777   | STAT5B   | STAT5B   | SIGNAL TRANSDUCER AND ACTIVATOR OF TRANSCRIPTION 5B                                     |
| 6778   | STAT6    | STAT6    | SIGNAL TRANSDUCER AND ACTIVATOR OF TRANSCRIPTION 6, INTERLEUKIN-4 INDUCED               |
| 10923  | SUB1     | SUB1     | SUB1 HOMOLOG (S. CEREVISIAE)                                                            |
| 51684  | SUFU     | SUFU     | SUPPRESSOR OF FUSED HOMOLOG (DROSOPHILA)                                                |
| 129025 | SUHW1    | SUHW1    | SUPPRESSOR OF HAIRY WING HOMOLOG 1 (DROSOPHILA)                                         |
| 140683 | SUHW2    | SUHW2    | SUPPRESSOR OF HAIRY WING HOMOLOG 2 (DROSOPHILA)                                         |
| 11198  | SUPT16H  | SUPT16H  | SUPPRESSOR OF TY 16 HOMOLOG (S. CEREVISIAE)                                             |
| 8464   | SUPT3H   | SUPT3H   | SUPPRESSOR OF TY 3 HOMOLOG (S. CEREVISIAE)                                              |
| 6827   | SUPT4H1  | SUPT4H1  | SUPPRESSOR OF TY 4 HOMOLOG 1 (S. CEREVISIAE)                                            |
| 6828   | SUPT5H   | SUPT5H   | SUPPRESSOR OF TY 5 HOMOLOG (S. CEREVISIAE)                                              |
| 6830   | SUPT6H   | SUPT6H   | SUPPRESSOR OF TY 6 HOMOLOG (S. CEREVISIAE)                                              |
| 9913   | SUPT7L   | SUPT7L   | SUPPRESSOR OF TY 7 (S. CEREVISIAE)-LIKE                                                 |
| 9412   | SURB7    | SURB7    | SRB7 SUPPRESSOR OF RNA POLYMERASE B HOMOLOG (YEAST)                                     |
| 79723  | SUV39H2  | SUV39H2  | SUPPRESSOR OF VARIATION 3-9 HOMOLOG 2 (DROSOPHILA)                                      |
| 23512  | SUZ12    | SUZ12    | SUPPRESSOR OF ZESTE 12 HOMOLOG (DROSOPHILA)                                             |
| 6862   | T        | T        | T, BRACHYURY HOMOLOG (MOUSE)                                                            |
| 6871   | TADA2L   | TADA2L   | TRANSCRIPTIONAL ADAPTOR 2 (ADA2 HOMOLOG, YEAST)-LIKE                                    |
| 10474  | TADA3L   | TADA3L   | TRANSCRIPTIONAL ADAPTOR 3 (NGG1 HOMOLOG, YEAST)-LIKE                                    |
| 6872   | TAF1     | TAF1     | TAF1 RNA POLYMERASE II, TATA BOX BINDING PROTEIN (TBP)-ASSOCIATED FACTOR, 250KDA        |
| 6881   | TAF10    | TAF10    | TAF10 RNA POLYMERASE II, TATA BOX BINDING PROTEIN (TBP)-ASSOCIATED FACTOR, 30KDA        |
| 6882   | TAF11    | TAF11    | TAF11 RNA POLYMERASE II, TATA BOX BINDING PROTEIN (TBP)-ASSOCIATED FACTOR, 28KDA        |
| 6883   | TAF12    | TAF12    | TAF12 RNA POLYMERASE II, TATA BOX BINDING PROTEIN (TBP)-ASSOCIATED FACTOR, 20KDA        |
| 6884   | TAF13    | TAF13    | TAF13 RNA POLYMERASE II, TATA BOX BINDING PROTEIN (TBP)-ASSOCIATED FACTOR, 18KDA        |
| 8148   | TAF15    | TAF15    | TAF15 RNA POLYMERASE II, TATA BOX BINDING PROTEIN (TBP)-ASSOCIATED FACTOR, 68KDA        |
| 9015   | TAF1A    | TAF1A    | TATA BOX BINDING PROTEIN (TBP)-ASSOCIATED FACTOR, RNA POLYMERASE I, A, 48KDA            |
| 9014   | TAF1B    | TAF1B    | TATA BOX BINDING PROTEIN (TBP)-ASSOCIATED FACTOR, RNA POLYMERASE I, B, 63KDA            |
| 9013   | TAF1C    | TAF1C    | TATA BOX BINDING PROTEIN (TBP)-ASSOCIATED FACTOR, RNA POLYMERASE I, C, 110KDA           |
| 138474 | TAF1L    | TAF1L    | TAF1-LIKE RNA POLYMERASE II, TATA BOX BINDING PROTEIN (TBP)-ASSOCIATED FACTOR, 210KDA   |
| 6874   | TAF4     | TAF4     | TAF4 RNA POLYMERASE II, TATA BOX BINDING PROTEIN (TBP)-ASSOCIATED FACTOR, 135KDA        |
| 6875   | TAF4B    | TAF4B    | TAF4B RNA POLYMERASE II, TATA BOX BINDING PROTEIN (TBP)-ASSOCIATED FACTOR, 105KDA       |
| 6877   | TAF5     | TAF5     | TAF5 RNA POLYMERASE II, TATA BOX BINDING PROTEIN (TBP)-ASSOCIATED FACTOR, 100KDA        |
| 27097  | TAF5L    | TAF5L    | TAF5-LIKE RNA POLYMERASE II, P300/CBP-ASSOCIATED FACTOR (PCAF)-ASSOCIATED FACTOR, 65KDA |
| 6878   | TAF6     | TAF6     | TAF6 RNA POLYMERASE II, TATA BOX BINDING PROTEIN (TBP)-ASSOCIATED FACTOR, 80KDA         |
| 10629  | TAF6L    | TAF6L    | TAF6-LIKE RNA POLYMERASE II, P300/CBP-ASSOCIATED FACTOR (PCAF)-ASSOCIATED FACTOR, 65KDA |
| 6879   | TAF7     | TAF7     | TAF7 RNA POLYMERASE II, TATA BOX BINDING PROTEIN (TBP)-ASSOCIATED FACTOR, 55KDA         |
| 6880   | TAF9     | TAF9     | TAF9 RNA POLYMERASE II, TATA BOX BINDING PROTEIN (TBP)-ASSOCIATED FACTOR, 32KDA         |
| 51616  | TAF9B    | TAF9B    | TAF9B RNA POLYMERASE II, TATA BOX BINDING PROTEIN (TBP)-ASSOCIATED FACTOR, 31KDA        |
| 6886   | TAL1     | TAL1     | T-CELL ACUTE LYMPHOCYTIC LEUKEMIA 1                                                     |
| 6887   | TAL2     | TAL2     | T-CELL ACUTE LYMPHOCYTIC LEUKEMIA 2                                                     |
| 6894   | TARBP1   | TARBP1   | TAR (HIV-1) RNA BINDING PROTEIN 1                                                       |
| 6895   | TARBP2   | TARBP2   | TAR (HIV-1) RNA BINDING PROTEIN 2                                                       |
| 23435  | TARDBP   | TARDBP   | TAR DNA BINDING PROTEIN                                                                 |
| 30851  | TAX1BP3  | TAX1BP3  | TAX1 (HUMAN T-CELL LEUKEMIA VIRUS TYPE 1) BINDING PROTEIN 3                             |
| 25771  | TBC1D22A | TBC1D22A | TBC1 DOMAIN FAMILY, MEMBER 22A                                                          |
| 23102  | TBC1D2B  | TBC1D2B  | TBC1 DOMAIN FAMILY, MEMBER 2B                                                           |
| 6907   | TBL1X    | TBL1X    | TRANSDUCIN (BETA)-LIKE 1X-LINKED                                                        |
| 6908   | TBP      | TBP      | TATA BOX BINDING PROTEIN                                                                |
| 9519   | TBPL1    | TBPL1    | TBP-LIKE 1                                                                              |
| 10716  | TBR1     | TBR1     | T-BOX, BRAIN, 1                                                                         |
| 6899   | TBX1     | TBX1     | T-BOX 1                                                                                 |
| 347853 | TBX10    | TBX10    | T-BOX 10                                                                                |
| 6913   | TBX15    | TBX15    | T-BOX 15                                                                                |
| 9096   | TBX18    | TBX18    | T-BOX 18                                                                                |
| 9095   | TBX19    | TBX19    | T-BOX 19                                                                                |
| 6909   | TBX2     | TBX2     | T-BOX 2                                                                                 |
| 57057  | TBX20    | TBX20    | T-BOX 20                                                                                |
| 30009  | TBX21    | TBX21    | TRANSCRIPTION FACTOR TBLYM                                                              |
| 50945  | TBX22    | TBX22    | T-BOX 22                                                                                |
| 6926   | TBX3     | TBX3     | T-BOX 3 (ULNAR MAMMARY SYNDROME)                                                        |
| 9496   | TBX4     | TBX4     | T-BOX 4                                                                                 |
| 6910   | TBX5     | TBX5     | T-BOX 5                                                                                 |
| 6911   | TBX6     | TBX6     | T-BOX 6                                                                                 |
| 6917   | TCEA1    | TCEA1    | TRANSCRIPTION ELONGATION FACTOR A (SII), 1                                              |
| 6919   | TCEA2    | TCEA2    | TRANSCRIPTION ELONGATION FACTOR A (SII), 2                                              |
| 6920   | TCEA3    | TCEA3    | TRANSCRIPTION ELONGATION FACTOR A (SII), 3                                              |
| 9338   | TCEAL1   | TCEAL1   | TRANSCRIPTION ELONGATION FACTOR A (SII)-LIKE 1                                          |
| 6921   | TCEB1    | TCEB1    | TRANSCRIPTION ELONGATION FACTOR B (SIII), POLYPEPTIDE 1 (15KDA, ELONGIN C)              |

|        |           |          |                                                                                                    |
|--------|-----------|----------|----------------------------------------------------------------------------------------------------|
| 6923   | TCEB2     | TCEB2    | TRANSCRIPTION ELONGATION FACTOR B (SIII), POLYPEPTIDE 2 (18KDA, ELONGIN B)                         |
| 6924   | TCEB3     | TCEB3    | TRANSCRIPTION ELONGATION FACTOR B (SIII), POLYPEPTIDE 3 (110KDA, ELONGIN A)                        |
| 51224  | TCEB3B    | TCEB3B   | TRANSCRIPTION ELONGATION FACTOR B POLYPEPTIDE 3B (ELONGIN A2)                                      |
| 162899 | TCEB3C    | TCEB3C   | TRANSCRIPTION ELONGATION FACTOR B POLYPEPTIDE 3C (ELONGIN A3)                                      |
| 10915  | TCERG1    | TCERG1   | TRANSCRIPTION ELONGATION REGULATOR 1                                                               |
| 6927   | TCF1      | TCF1     | TRANSCRIPTION FACTOR 1, HEPATIC; LF-B1, HEPATIC NUCLEAR FACTOR (HNF1), ALBUMIN PROXIMAL FACTOR     |
| 6938   | TCF12     | TCF12    | TRANSCRIPTION FACTOR 12 (HTF4, HELIX-LOOP-HELIX TRANSCRIPTION FACTORS 4)                           |
| 6939   | TCF15     | TCF15    | TRANSCRIPTION FACTOR 15 (BASIC HELIX-LOOP-HELIX)                                                   |
| 6941   | TCF19     | TCF19    | TRANSCRIPTION FACTOR 19 (SC1)                                                                      |
| 6928   | TCF2      | TCF2     | TRANSCRIPTION FACTOR 2, HEPATIC; LF-B3; VARIANT HEPATIC NUCLEAR FACTOR                             |
| 6942   | TCF20     | TCF20    | TRANSCRIPTION FACTOR 20 (AR1)                                                                      |
| 6943   | TCF21     | TCF21    | TRANSCRIPTION FACTOR 21                                                                            |
| 6929   | TCF3      | TCF3     | TRANSCRIPTION FACTOR 3 (E2A IMMUNOGLOBULIN ENHANCER BINDING FACTORS E12/E47)                       |
| 6925   | TCF4      | TCF4     | TRANSCRIPTION FACTOR 4                                                                             |
| 6932   | TCF7      | TCF7     | TRANSCRIPTION FACTOR 7 (T-CELL SPECIFIC, HMG-BOX)                                                  |
| 83439  | TCF7L1    | TCF7L1   | TRANSCRIPTION FACTOR 7-LIKE 1 (T-CELL SPECIFIC, HMG-BOX)                                           |
| 6934   | TCF7L2    | TCF7L2   | TRANSCRIPTION FACTOR 7-LIKE 2 (T-CELL SPECIFIC, HMG-BOX)                                           |
| 6935   | TCF8      | TCF8     | TRANSCRIPTION FACTOR 8 (REPRESSSES INTERLEUKIN 2 EXPRESSION)                                       |
| 10732  | TCFL5     | TCFL5    | TRANSCRIPTION FACTOR-LIKE 5 (BASIC HELIX-LOOP-HELIX)                                               |
| 6949   | TCOF1     | TCOF1    | TREACHER COLLINS-FRANCESCHETTI SYNDROME 1                                                          |
| 7003   | TEAD1     | TEAD1    | TEA DOMAIN FAMILY MEMBER 1 (SV40 TRANSCRIPTIONAL ENHANCER FACTOR)                                  |
| 8463   | TEAD2     | TEAD2    | TEA DOMAIN FAMILY MEMBER 2                                                                         |
| 7005   | TEAD3     | TEAD3    | TEA DOMAIN FAMILY MEMBER 3                                                                         |
| 7004   | TEAD4     | TEAD4    | TEA DOMAIN FAMILY MEMBER 4                                                                         |
| 7008   | TEF       | TEF      | THYROTROPIC EMBRYONIC FACTOR                                                                       |
| 7020   | TFAP2A    | TFAP2A   | TRANSCRIPTION FACTOR AP-2 ALPHA (ACTIVATING ENHANCER BINDING PROTEIN 2 ALPHA)                      |
| 7021   | TFAP2B    | TFAP2B   | TRANSCRIPTION FACTOR AP-2 BETA (ACTIVATING ENHANCER BINDING PROTEIN 2 BETA)                        |
| 7022   | TFAP2C    | TFAP2C   | TRANSCRIPTION FACTOR AP-2 GAMMA (ACTIVATING ENHANCER BINDING PROTEIN 2 GAMMA)                      |
| 83741  | TFAP2D    | TFAP2D   | TRANSCRIPTION FACTOR AP-2 DELTA (ACTIVATING ENHANCER BINDING PROTEIN 2 DELTA)                      |
| 339488 | TFAP2E    | TFAP2E   | TRANSCRIPTION FACTOR AP-2 EPSILON (ACTIVATING ENHANCER BINDING PROTEIN 2 EPSILON)                  |
| 7023   | TFAP4     | TFAP4    | TRANSCRIPTION FACTOR AP-4 (ACTIVATING ENHANCER BINDING PROTEIN 4)                                  |
| 7024   | TFCP2     | TFCP2    | TRANSCRIPTION FACTOR CP2                                                                           |
| 29842  | TFCP2L1   | TFCP2L1  | TRANSCRIPTION FACTOR CP2-LIKE 1                                                                    |
| 7027   | TFDP1     | TFDP1    | TRANSCRIPTION FACTOR DP-1                                                                          |
| 7029   | TFDP2     | TFDP2    | TRANSCRIPTION FACTOR DP-2 (E2F DIMERIZATION PARTNER 2)                                             |
| 51270  | TFDP3     | TFDP3    | TRANSCRIPTION FACTOR DP FAMILY, MEMBER 3                                                           |
| 7030   | TFE3      | TFE3     | TRANSCRIPTION FACTOR BINDING TO IGHM ENHANCER 3                                                    |
| 7942   | TFEB      | TFEB     | TRANSCRIPTION FACTOR EB                                                                            |
| 22797  | TFEC      | TFEC     | TRANSCRIPTION FACTOR EC                                                                            |
| 29844  | TFPT      | TFPT     | TCF3 (E2A) FUSION PARTNER (IN CHILDHOOD LEUKEMIA)                                                  |
| 7041   | TGFBI11   | TGFBI11  | TRANSFORMING GROWTH FACTOR BETA 1 INDUCED TRANSCRIPT 1                                             |
| 7050   | TGIF      | TGIF     | TGFB-INDUCED FACTOR (TALE FAMILY HOMEBOX)                                                          |
| 60436  | TGIF2     | TGIF2    | TGFB-induced factor homeobox 2                                                                     |
| 90316  | TGIF2LX   | TGIF2LX  | TGFB-INDUCED FACTOR 2-LIKE, X-LINKED                                                               |
| 90655  | TGIF2LY   | TGIF2LY  | TGFB-INDUCED FACTOR 2-LIKE, Y-LINKED                                                               |
| 51497  | TH1L      | TH1L     | TH1-LIKE (DROSOPHILA)                                                                              |
| 80764  | THAP7     | THAP7    | THAP DOMAIN CONTAINING 7                                                                           |
| 10189  | THOC4     | THOC4    | THO COMPLEX 4                                                                                      |
| 7067   | THRA      | THRA     | THYROID HORMONE RECEPTOR, ALPHA (ERYTHROBLASTIC LEUKEMIA VIRAL (V-ERB-A) ONCOGENE HOMOLOG, AVIAN)  |
| 9969   | THRAP1    | THRAP1   | THYROID HORMONE RECEPTOR ASSOCIATED PROTEIN 1                                                      |
| 9967   | THRAP3    | THRAP3   | THYROID HORMONE RECEPTOR ASSOCIATED PROTEIN 3                                                      |
| 10025  | THRAP5    | THRAP5   | THYROID HORMONE RECEPTOR ASSOCIATED PROTEIN 5                                                      |
| 90390  | THRAP6    | THRAP6   | THYROID HORMONE RECEPTOR ASSOCIATED PROTEIN 6                                                      |
| 7068   | THRB      | THRB     | THYROID HORMONE RECEPTOR, BETA (ERYTHROBLASTIC LEUKEMIA VIRAL (V-ERB-A) ONCOGENE HOMOLOG 2, AVIAN) |
| 7073   | TIAL1     | TIAL1    | TIA1 CYTOTOXIC GRANULE-ASSOCIATED RNA BINDING PROTEIN-LIKE 1                                       |
| 201798 | TIGD4     | TIGD4    | TIGGER TRANSPOSABLE ELEMENT DERIVED 4                                                              |
| 8914   | TIMELESS  | TIMELESS | TIMELESS HOMOLOG (DROSOPHILA)                                                                      |
| 7080   | TITF1     | TITF1    | THYROID TRANSCRIPTION FACTOR 1                                                                     |
| 7088   | TLE1      | TLE1     | TRANSDUCIN-LIKE ENHANCER OF SPLIT 1 (E(SP1) HOMOLOG, DROSOPHILA)                                   |
| 7089   | TLE2      | TLE2     | TRANSDUCIN-LIKE ENHANCER OF SPLIT 2 (E(SP1) HOMOLOG, DROSOPHILA)                                   |
| 7090   | TLE3      | TLE3     | TRANSDUCIN-LIKE ENHANCER OF SPLIT 3 (E(SP1) HOMOLOG, DROSOPHILA)                                   |
| 79816  | TLE6      | TLE6     | TRANSDUCIN-LIKE ENHANCER OF SPLIT 6 (E(SP1) HOMOLOG, DROSOPHILA)                                   |
| 3195   | TLX1      | TLX1     | T-CELL LEUKEMIA HOMEBOX 1                                                                          |
| 3196   | TLX2      | TLX2     | T-CELL LEUKEMIA HOMEBOX 2                                                                          |
| 30012  | TLX3      | TLX3     | T-CELL LEUKEMIA HOMEBOX 3                                                                          |
| 7110   | TMF1      | TMF1     | TATA ELEMENT MODULATORY FACTOR 1                                                                   |
| 7128   | TNFAIP3   | TNFAIP3  | TUMOR NECROSIS FACTOR, ALPHA-INDUCED PROTEIN 3                                                     |
| 11189  | TNRC4     | TNRC4    | TRINUCLEOTIDE REPEAT CONTAINING 4                                                                  |
| 27324  | TNRC9     | TNRC9    | TRINUCLEOTIDE REPEAT CONTAINING 9                                                                  |
| 10140  | TOB1      | TOB1     | TRANSDUCER OF ERBB2, 1                                                                             |
| 114034 | TOE1      | TOE1     | target of EGFR1, member 1 (nuclear)                                                                |
| 7155   | TOPO2B    | TOPO2B   | TOPOISOMERASE (DNA) II BETA 180KDA                                                                 |
| 10210  | TOPORS    | TOPORS   | TOPOISOMERASE I BINDING, ARGININE/SERINE-RICH                                                      |
| 9760   | TOX       | TOX      | THYMUS HIGH MOBILITY GROUP BOX PROTEIN TOX                                                         |
| 84969  | C20orf100 | TOX2     | TOX high mobility group box family member 2                                                        |
| 9878   | C14orf92  | TOX4     | TOX high mobility group box family member 4                                                        |
| 7157   | TP53      | TP53     | TUMOR PROTEIN P53 (LI-FRAUMENI SYNDROME)                                                           |
| 7158   | TP53BP1   | TP53BP1  | TUMOR PROTEIN P53 BINDING PROTEIN, 1                                                               |
| 7161   | TP73      | TP73     | TUMOR PROTEIN P73                                                                                  |
| 8626   | TP73L     | TP73L    | TUMOR PROTEIN P73-LIKE                                                                             |
| 55809  | TREMF1    | TREMF1   | TRANSCRIPTIONAL REGULATING FACTOR 1                                                                |
| 9477   | TRF       | TRF      | TRF (TATA BINDING PROTEIN-RELATED FACTOR)-PROXIMAL HOMOLOG (DROSOPHILA)                            |
| 57761  | TRIB3     | TRIB3    | TRIBBLES HOMOLOG 3 (DROSOPHILA)                                                                    |
| 89870  | TRIM15    | TRIM15   | TRIPARTITE MOTIF-CONTAINING 15                                                                     |
| 10626  | TRIM16    | TRIM16   | TRIPARTITE MOTIF-CONTAINING 16                                                                     |
| 6737   | TRIM21    | TRIM21   | TRIPARTITE MOTIF-CONTAINING 21                                                                     |
| 10346  | TRIM22    | TRIM22   | TRIPARTITE MOTIF-CONTAINING 22                                                                     |
| 8805   | TRIM24    | TRIM24   | TRIPARTITE MOTIF-CONTAINING 24                                                                     |
| 7706   | TRIM25    | TRIM25   | TRIPARTITE MOTIF-CONTAINING 25                                                                     |
| 10155  | TRIM28    | TRIM28   | TRIPARTITE MOTIF-CONTAINING 28                                                                     |
| 23650  | TRIM29    | TRIM29   | TRIPARTITE MOTIF-CONTAINING 29                                                                     |
| 11074  | TRIM31    | TRIM31   | TRIPARTITE MOTIF-CONTAINING 31                                                                     |
| 22954  | TRIM32    | TRIM32   | TRIPARTITE MOTIF-CONTAINING 32                                                                     |
| 51592  | TRIM33    | TRIM33   | TRIPARTITE MOTIF-CONTAINING 33                                                                     |
| 85363  | TRIM5     | TRIM5    | TRIPARTITE MOTIF-CONTAINING 5                                                                      |
| 9321   | TRIP11    | TRIP11   | THYROID HORMONE RECEPTOR INTERACTOR 11                                                             |
| 9319   | TRIP13    | TRIP13   | THYROID HORMONE RECEPTOR INTERACTOR 13                                                             |
| 9325   | TRIP4     | TRIP4    | THYROID HORMONE RECEPTOR INTERACTOR 4                                                              |
| 7205   | TRIP6     | TRIP6    | THYROID HORMONE RECEPTOR INTERACTOR 6                                                              |
| 7227   | TRPS1     | TRPS1    | TRICHOHINOPHALANGAL SYNDROME 1                                                                     |
| 8295   | TRRAP     | TRRAP    | TRANSFORMATION/TRANSCRIPTION DOMAIN-ASSOCIATED PROTEIN                                             |
| 8848   | TSC22D1   | TSC22D1  | TSC22 DOMAIN FAMILY, MEMBER 1                                                                      |
| 9819   | TSC22D2   | TSC22D2  | TSC22 DOMAIN FAMILY, MEMBER 2                                                                      |
| 1831   | TSC22D3   | TSC22D3  | TSC22 DOMAIN FAMILY, MEMBER 3                                                                      |
| 81628  | TSC22D4   | TSC22D4  | TSC22 DOMAIN FAMILY, MEMBER 4                                                                      |
| 7251   | TSGL1     | TSGL1    | TUMOR SUSCEPTIBILITY GENE 101                                                                      |
| 10194  | TSHZ1     | TSHZ1    | teashirt zinc finger homeobox 1                                                                    |
| 128553 | TSHZ2     | TSHZ2    | teashirt zinc finger homeobox 2                                                                    |
| 57616  | TSHZ3     | TSHZ3    | teashirt zinc finger homeobox 3                                                                    |
| 8458   | TTF2      | TTF2     | TRANSCRIPTION TERMINATION FACTOR, RNA POLYMERASE II                                                |
| 7289   | TULP3     | TULP3    | TUBBY LIKE PROTEIN 3                                                                               |
| 56995  | TULP4     | TULP4    | TUBBY LIKE PROTEIN 4                                                                               |
| 7291   | TWIST1    | TWIST1   | TWIST HOMOLOG 1 (ACROCEPHALOSYNDACTYLY 3; SAETHRE-CHOTZEN SYNDROME) (DROSOPHILA)                   |
| 117581 | TWIST2    | TWIST2   | TWIST HOMOLOG 2 (DROSOPHILA)                                                                       |
| 29855  | UBN1      | UBN1     | UBINUCLEIN 1                                                                                       |
| 7342   | UBP1      | UBP1     | UPSTREAM BINDING PROTEIN 1 (LBP-1A)                                                                |
| 7343   | UBTF      | UBTF     | UPSTREAM BINDING TRANSCRIPTION FACTOR, RNA POLYMERASE I                                            |
| 5976   | UPF1      | UPF1     | UPF1 REGULATOR OF NONSENSE TRANSCRIPTS HOMOLOG (YEAST)                                             |
| 7391   | USF1      | USF1     | UPSTREAM TRANSCRIPTION FACTOR 1                                                                    |
| 7392   | USF2      | USF2     | UPSTREAM TRANSCRIPTION FACTOR 2, C-FOS INTERACTING                                                 |
| 8433   | UTF1      | UTF1     | UNDIFFERENTIATED EMBRYONIC CELL TRANSCRIPTION FACTOR 1                                             |
| 11023  | VAX1      | VAX1     | VENTRAL ANTERIOR HOMEBOX 1                                                                         |
| 25806  | VAX2      | VAX2     | VENTRAL ANTERIOR HOMEBOX 2                                                                         |
| 9084   | VCY       | VCY      | VARIABLE CHARGE, Y-LINKED                                                                          |
| 7421   | VDR       | VDR      | VITAMIN D (1,25-DIHYDROXYVITAMIN D3) RECEPTOR                                                      |
| 27287  | VENTX     | VENTX    | VENT HOMEBOX HOMOLOG (XENOPUS LAEVIS)                                                              |
| 51442  | VGLL1     | VGLL1    | VESTIGIAL LIKE 1 (DROSOPHILA)                                                                      |
| 245806 | VGLL2     | VGLL2    | VESTIGIAL LIKE 2 (DROSOPHILA)                                                                      |
| 7428   | VHL       | VHL      | VON HIPPEL-LINDAU TUMOR SUPPRESSOR                                                                 |

|        |         |         |                                                                                                                               |
|--------|---------|---------|-------------------------------------------------------------------------------------------------------------------------------|
| 30813  | VSX1    | VSX1    | VISUAL SYSTEM HOMEOBOX 1 HOMOLOG, CHX10-LIKE (ZEBRAFISH)                                                                      |
| 51729  | WBP11   | WBP11   | WW DOMAIN BINDING PROTEIN 11                                                                                                  |
| 11169  | WDHD1   | WDHD1   | WD REPEAT AND HMG-BOX DNA BINDING PROTEIN 1                                                                                   |
| 7489   | WHSC1   | WHSC1   | WOLF-HIRSCHHORN SYNDROME CANDIDATE 1                                                                                          |
| 54904  | WHSC1L1 | WHSC1L1 | WOLF-HIRSCHHORN SYNDROME CANDIDATE 1-LIKE 1                                                                                   |
| 7469   | WHSC2   | WHSC2   | WOLF-HIRSCHHORN SYNDROME CANDIDATE 2                                                                                          |
| 7490   | WT1     | WT1     | WILMS TUMOR 1                                                                                                                 |
| 11059  | WWP1    | WWP1    | WW DOMAIN CONTAINING E3 UBIQUITIN PROTEIN LIGASE 1                                                                            |
| 25937  | WWTR1   | WWTR1   | WW DOMAIN CONTAINING TRANSCRIPTION REGULATOR 1                                                                                |
| 56949  | XAB2    | XAB2    | XPA BINDING PROTEIN 2                                                                                                         |
| 7494   | XBP1    | XBP1    | X-BOX BINDING PROTEIN 1                                                                                                       |
| 7508   | XPC     | XPC     | XERODERMA PIGMENTOSUM, COMPLEMENTATION GROUP C                                                                                |
| 7517   | XRCC3   | XRCC3   | X-RAY REPAIR COMPLEMENTING DEFECTIVE REPAIR IN CHINESE HAMSTER CELLS 3                                                        |
| 7520   | XRCC5   | XRCC5   | X-RAY REPAIR COMPLEMENTING DEFECTIVE REPAIR IN CHINESE HAMSTER CELLS 5 (DOUBLE-STRAND-BREAK REJOINING; KU AUTOANTIGEN, 80KDA) |
| 2547   | XRCC6   | XRCC6   | X-RAY REPAIR COMPLEMENTING DEFECTIVE REPAIR IN CHINESE HAMSTER CELLS 6 (KU AUTOANTIGEN, 70KDA)                                |
| 10138  | YAF2    | YAF2    | YY1 ASSOCIATED FACTOR 2                                                                                                       |
| 4904   | YBX1    | YBX1    | Y BOX BINDING PROTEIN 1                                                                                                       |
| 51087  | YBX2    | YBX2    | Y BOX BINDING PROTEIN 2                                                                                                       |
| 55689  | YEATS2  | YEATS2  | YEATS DOMAIN CONTAINING 2                                                                                                     |
| 8089   | YEATS4  | YEATS4  | YEATS DOMAIN CONTAINING 4                                                                                                     |
| 91746  | YTHDC1  | YTHDC1  | YTH DOMAIN CONTAINING 1                                                                                                       |
| 7528   | YY1     | YY1     | YY1 TRANSCRIPTION FACTOR                                                                                                      |
| 22890  | ZBTB1   | ZBTB1   | ZINC FINGER AND BTB DOMAIN CONTAINING 1                                                                                       |
| 65986  | ZBTB10  | ZBTB10  | ZINC FINGER AND BTB DOMAIN CONTAINING 10                                                                                      |
| 27107  | ZBTB11  | ZBTB11  | ZINC FINGER AND BTB DOMAIN CONTAINING 11                                                                                      |
| 221527 | ZBTB12  | ZBTB12  | ZINC FINGER AND BTB DOMAIN CONTAINING 12                                                                                      |
| 7704   | ZBTB16  | ZBTB16  | ZINC FINGER AND BTB DOMAIN CONTAINING 16                                                                                      |
| 7709   | ZBTB17  | ZBTB17  | ZINC FINGER AND BTB DOMAIN CONTAINING 17                                                                                      |
| 57621  | ZBTB2   | ZBTB2   | ZINC FINGER AND BTB DOMAIN CONTAINING 2                                                                                       |
| 26137  | ZBTB20  | ZBTB20  | ZINC FINGER AND BTB DOMAIN CONTAINING 20                                                                                      |
| 9841   | ZBTB24  | ZBTB24  | ZINC FINGER AND BTB DOMAIN CONTAINING 24                                                                                      |
| 7597   | ZBTB25  | ZBTB25  | ZINC FINGER AND BTB DOMAIN CONTAINING 25                                                                                      |
| 57684  | ZBTB26  | ZBTB26  | ZINC FINGER AND BTB DOMAIN CONTAINING 26                                                                                      |
| 79842  | ZBTB3   | ZBTB3   | ZINC FINGER AND BTB DOMAIN CONTAINING 3                                                                                       |
| 27033  | ZBTB32  | ZBTB32  | ZINC FINGER AND BTB DOMAIN CONTAINING 32                                                                                      |
| 10009  | ZBTB33  | ZBTB33  | ZINC FINGER AND BTB DOMAIN CONTAINING 33                                                                                      |
| 403341 | ZBTB34  | ZBTB34  | ZINC FINGER AND BTB DOMAIN CONTAINING 34                                                                                      |
| 84614  | ZBTB37  | ZBTB37  | ZINC FINGER AND BTB DOMAIN CONTAINING 37                                                                                      |
| 253461 | ZBTB38  | ZBTB38  | ZINC FINGER AND BTB DOMAIN CONTAINING 38                                                                                      |
| 9880   | ZBTB39  | ZBTB39  | ZINC FINGER AND BTB DOMAIN CONTAINING 39                                                                                      |
| 9923   | ZBTB40  | ZBTB40  | ZINC FINGER AND BTB DOMAIN CONTAINING 40                                                                                      |
| 9925   | ZBTB5   | ZBTB5   | ZINC FINGER AND BTB DOMAIN CONTAINING 5                                                                                       |
| 51341  | ZBTB7A  | ZBTB7A  | ZINC FINGER AND BTB DOMAIN CONTAINING 7A                                                                                      |
| 51043  | ZBTB7B  | ZBTB7B  | ZINC FINGER AND BTB DOMAIN CONTAINING 7B                                                                                      |
| 127557 | ZBTB8   | ZBTB8   | ZINC FINGER AND BTB DOMAIN CONTAINING 8                                                                                       |
| 221504 | ZBTB9   | ZBTB9   | ZINC FINGER AND BTB DOMAIN CONTAINING 9                                                                                       |
| 23211  | C19orf7 | ZC3H4   | zinc finger CCH-type containing 4                                                                                             |
| 29800  | ZDHHC1  | ZDHHC1  | ZINC FINGER, DHHC-TYPE CONTAINING 1                                                                                           |
| 54503  | ZDHHC13 | ZDHHC13 | ZINC FINGER, DHHC-TYPE CONTAINING 13                                                                                          |
| 158866 | ZDHHC15 | ZDHHC15 | ZINC FINGER, DHHC-TYPE CONTAINING 15                                                                                          |
| 84287  | ZDHHC16 | ZDHHC16 | ZINC FINGER, DHHC-TYPE CONTAINING 16                                                                                          |
| 51201  | ZDHHC2  | ZDHHC2  | ZINC FINGER, DHHC-TYPE CONTAINING 2                                                                                           |
| 340481 | ZDHHC21 | ZDHHC21 | ZINC FINGER, DHHC-TYPE CONTAINING 21                                                                                          |
| 64429  | ZDHHC6  | ZDHHC6  | ZINC FINGER, DHHC-TYPE CONTAINING 6                                                                                           |
| 55625  | ZDHHC7  | ZDHHC7  | ZINC FINGER, DHHC-TYPE CONTAINING 7                                                                                           |
| 51114  | ZDHHC9  | ZDHHC9  | ZINC FINGER, DHHC-TYPE CONTAINING 9                                                                                           |
| 58487  | ZF      | ZF      | HCF-BINDING TRANSCRIPTION FACTOR ZHANGFEI                                                                                     |
| 9839   | ZFHX1B  | ZFHX1B  | ZINC FINGER HOMEOBOX 1B                                                                                                       |
| 85446  | ZFHX2   | ZFHX2   | ZINC FINGER HOMEOBOX 2                                                                                                        |
| 162239 | ZFP1    | ZFP1    | ZINC FINGER PROTEIN 1 HOMOLOG (MOUSE)                                                                                         |
| 57677  | KAA1559 | ZFP14   | MOUSE ZINC FINGER PROTEIN 14-LIKE                                                                                             |
| 7541   | ZFP161  | ZFP161  | ZINC FINGER PROTEIN 161 HOMOLOG (MOUSE)                                                                                       |
| 80108  | ZFP2    | ZFP2    | ZINC FINGER PROTEIN 2 HOMOLOG (MOUSE)                                                                                         |
| 140612 | ZFP28   | ZFP28   | ZINC FINGER PROTEIN 28                                                                                                        |
| 22835  | ZFP30   | ZFP30   | ZINC FINGER PROTEIN 30 HOMOLOG (MOUSE)                                                                                        |
| 7538   | ZFP36   | ZFP36   | ZINC FINGER PROTEIN 36, C3H TYPE, HOMOLOG (MOUSE)                                                                             |
| 677    | ZFP36L1 | ZFP36L1 | ZINC FINGER PROTEIN 36, C3H TYPE-LIKE 1                                                                                       |
| 678    | ZFP36L2 | ZFP36L2 | ZINC FINGER PROTEIN 36, C3H TYPE-LIKE 2                                                                                       |
| 7539   | ZFP37   | ZFP37   | ZINC FINGER PROTEIN 37 HOMOLOG (MOUSE)                                                                                        |
| 286128 | ZFP41   | ZFP41   | ZINC FINGER PROTEIN 41                                                                                                        |
| 132625 | ZFP42   | ZFP42   | ZINC FINGER PROTEIN 42                                                                                                        |
| 346171 | ZFP57   | ZFP57   | ZINC FINGER PROTEIN 57 HOMOLOG (MOUSE)                                                                                        |
| 92379  | ZFP62   | ZFP62   | ZINC FINGER PROTEIN 62 HOMOLOG (MOUSE)                                                                                        |
| 55734  | ZFP64   | ZFP64   | ZINC FINGER PROTEIN 64 HOMOLOG (MOUSE)                                                                                        |
| 146198 | ZFP90   | ZFP90   | ZINC FINGER PROTEIN 90 HOMOLOG (MOUSE)                                                                                        |
| 80829  | ZFP91   | ZFP91   | ZINC FINGER PROTEIN 91 HOMOLOG (MOUSE)                                                                                        |
| 23660  | ZFP95   | ZFP95   | ZINC FINGER PROTEIN 95 HOMOLOG (MOUSE)                                                                                        |
| 7542   | ZFPL1   | ZFPL1   | ZINC FINGER PROTEIN-LIKE 1                                                                                                    |
| 161882 | ZFPM1   | ZFPM1   | ZINC FINGER PROTEIN, MULTITYPE 1                                                                                              |
| 23414  | ZFPM2   | ZFPM2   | ZINC FINGER PROTEIN, MULTITYPE 2                                                                                              |
| 7543   | ZFX     | ZFX     | ZINC FINGER PROTEIN, X-LINKED                                                                                                 |
| 7544   | ZFY     | ZFY     | ZINC FINGER PROTEIN, Y-LINKED                                                                                                 |
| 11244  | ZHX1    | ZHX1    | ZINC FINGERS AND HOMEOBOXES 1                                                                                                 |
| 22882  | ZHX2    | ZHX2    | ZINC FINGERS AND HOMEOBOXES 2                                                                                                 |
| 23051  | ZHX3    | ZHX3    | ZINC FINGERS AND HOMEOBOXES 3                                                                                                 |
| 7545   | ZIC1    | ZIC1    | ZIC FAMILY MEMBER 1 (ODD-PAIRED HOMOLOG, DROSOPHILA)                                                                          |
| 7546   | ZIC2    | ZIC2    | ZIC FAMILY MEMBER 2 (ODD-PAIRED HOMOLOG, DROSOPHILA)                                                                          |
| 7547   | ZIC3    | ZIC3    | ZIC FAMILY MEMBER 3 HETEROTAXY 1 (ODD-PAIRED HOMOLOG, DROSOPHILA)                                                             |
| 23619  | ZIM2    | ZIM2    | ZINC FINGER, IMPRINTED 2                                                                                                      |
| 114026 | ZIM3    | ZIM3    | ZINC FINGER, IMPRINTED 3                                                                                                      |
| 7585   | ZKSCAN1 | ZKSCAN1 | ZINC FINGER WITH KRAB AND SCAN DOMAINS 1                                                                                      |
| 10771  | ZMYND11 | ZMYND11 | ZINC FINGER, MYND DOMAIN CONTAINING 11                                                                                        |
| 7556   | ZNF10   | ZNF10   | ZINC FINGER PROTEIN 10                                                                                                        |
| 163227 | ZNF100  | ZNF100  | ZINC FINGER PROTEIN 100                                                                                                       |
| 94039  | ZNF101  | ZNF101  | ZINC FINGER PROTEIN 101                                                                                                       |
| 163071 | ZNF114  | ZNF114  | ZINC FINGER PROTEIN 114                                                                                                       |
| 7670   | ZNF117  | ZNF117  | ZINC FINGER PROTEIN 117 (HPF9)                                                                                                |
| 7558   | ZNF11B  | ZNF11B  | ZINC FINGER PROTEIN 11B                                                                                                       |
| 7559   | ZNF12   | ZNF12   | ZINC FINGER PROTEIN 12                                                                                                        |
| 7675   | ZNF121  | ZNF121  | ZINC FINGER PROTEIN 121 (CLONE ZHC32)                                                                                         |
| 7678   | ZNF124  | ZNF124  | ZINC FINGER PROTEIN 124 (HZF-16)                                                                                              |
| 7690   | ZNF131  | ZNF131  | ZINC FINGER PROTEIN 131 (CLONE PHZ-10)                                                                                        |
| 7691   | ZNF132  | ZNF132  | ZINC FINGER PROTEIN 132 (CLONE PHZ-12)                                                                                        |
| 7692   | ZNF133  | ZNF133  | ZINC FINGER PROTEIN 133 (CLONE PHZ-13)                                                                                        |
| 7693   | ZNF134  | ZNF134  | ZINC FINGER PROTEIN 134 (CLONE PHZ-15)                                                                                        |
| 7694   | ZNF135  | ZNF135  | ZINC FINGER PROTEIN 135 (CLONE PHZ-17)                                                                                        |
| 7695   | ZNF136  | ZNF136  | ZINC FINGER PROTEIN 136 (CLONE PHZ-20)                                                                                        |
| 7696   | ZNF137  | ZNF137  | ZINC FINGER PROTEIN 137 (CLONE PHZ-30)                                                                                        |
| 7697   | ZNF138  | ZNF138  | ZINC FINGER PROTEIN 138                                                                                                       |
| 7561   | ZNF14   | ZNF14   | ZINC FINGER PROTEIN 14 (KOX 6)                                                                                                |
| 7699   | ZNF140  | ZNF140  | ZINC FINGER PROTEIN 140 (CLONE PHZ-39)                                                                                        |
| 7700   | ZNF141  | ZNF141  | ZINC FINGER PROTEIN 141 (CLONE PHZ-44)                                                                                        |
| 7701   | ZNF142  | ZNF142  | ZINC FINGER PROTEIN 142 (CLONE PHZ-49)                                                                                        |
| 7702   | ZNF143  | ZNF143  | ZINC FINGER PROTEIN 143 (CLONE PHZ-1)                                                                                         |
| 7705   | ZNF146  | ZNF146  | ZINC FINGER PROTEIN 146                                                                                                       |
| 7707   | ZNF148  | ZNF148  | ZINC FINGER PROTEIN 148 (PHZ-52)                                                                                              |
| 7710   | ZNF154  | ZNF154  | ZINC FINGER PROTEIN 154 (PHZ-92)                                                                                              |
| 7711   | ZNF155  | ZNF155  | ZINC FINGER PROTEIN 155 (PHZ-96)                                                                                              |
| 7712   | ZNF157  | ZNF157  | ZINC FINGER PROTEIN 157 (HZF22)                                                                                               |
| 7564   | ZNF16   | ZNF16   | ZINC FINGER PROTEIN 16 (KOX 9)                                                                                                |
| 90338  | ZNF160  | ZNF160  | ZINC FINGER PROTEIN 160                                                                                                       |
| 7716   | ZNF161  | ZNF161  | ZINC FINGER PROTEIN 161                                                                                                       |
| 7718   | ZNF165  | ZNF165  | ZINC FINGER PROTEIN 165                                                                                                       |
| 55888  | ZNF167  | ZNF167  | ZINC FINGER PROTEIN 167                                                                                                       |
| 169841 | ZNF169  | ZNF169  | ZINC FINGER PROTEIN 169                                                                                                       |
| 7565   | ZNF17   | ZNF17   | ZINC FINGER PROTEIN 17 (HPF3, KOX 10)                                                                                         |
| 7727   | ZNF174  | ZNF174  | ZINC FINGER PROTEIN 174                                                                                                       |
| 7728   | ZNF175  | ZNF175  | ZINC FINGER PROTEIN 175                                                                                                       |
| 7730   | ZNF177  | ZNF177  | ZINC FINGER PROTEIN 177                                                                                                       |

|        |         |         |                                         |
|--------|---------|---------|-----------------------------------------|
| 7566   | ZNF18   | ZNF18   | ZINC FINGER PROTEIN 18 (KOX 11)         |
| 7733   | ZNF180  | ZNF180  | ZINC FINGER PROTEIN 180 (HHZ188)        |
| 7738   | ZNF184  | ZNF184  | ZINC FINGER PROTEIN 184                 |
| 7741   | ZNF187  | ZNF187  | ZINC FINGER PROTEIN 184 (KRUPPEL-LIKE)  |
| 7743   | ZNF189  | ZNF189  | ZINC FINGER PROTEIN 189                 |
| 7567   | ZNF19   | ZNF19   | ZINC FINGER PROTEIN 19 (KOX 12)         |
| 7571   | ZNF23   | ZNF19   | ZINC FINGER PROTEIN 19 (KOX 12)         |
| 7745   | ZNF192  | ZNF192  | ZINC FINGER PROTEIN 192                 |
| 7746   | ZNF193  | ZNF193  | ZINC FINGER PROTEIN 193                 |
| 7748   | ZNF195  | ZNF195  | ZINC FINGER PROTEIN 195                 |
| 10168  | ZNF197  | ZNF197  | ZINC FINGER PROTEIN 197                 |
| 7750   | ZNF198  | ZNF198  | ZINC FINGER PROTEIN 198                 |
| 7549   | ZNF2    | ZNF2    | ZINC FINGER PROTEIN 2                   |
| 7588   | ZNF20   | ZNF20   | ZINC FINGER PROTEIN 20 (KOX 13)         |
| 7752   | ZNF200  | ZNF200  | ZINC FINGER PROTEIN 200                 |
| 7753   | ZNF202  | ZNF202  | ZINC FINGER PROTEIN 202                 |
| 7755   | ZNF205  | ZNF205  | ZINC FINGER PROTEIN 205                 |
| 84891  | ZNF206  | ZNF206  | ZINC FINGER PROTEIN 206                 |
| 7756   | ZNF207  | ZNF207  | ZINC FINGER PROTEIN 207                 |
| 7757   | ZNF208  | ZNF208  | ZINC FINGER PROTEIN 208                 |
| 7569   | ZNF21   | ZNF21   | ZINC FINGER PROTEIN 21 (KOX 14)         |
| 10520  | ZNF211  | ZNF211  | ZINC FINGER PROTEIN 211                 |
| 7985   | ZNF212  | ZNF212  | ZINC FINGER PROTEIN 212                 |
| 7760   | ZNF213  | ZNF213  | ZINC FINGER PROTEIN 213                 |
| 7761   | ZNF214  | ZNF214  | ZINC FINGER PROTEIN 214                 |
| 7762   | ZNF215  | ZNF215  | ZINC FINGER PROTEIN 215                 |
| 7764   | ZNF217  | ZNF217  | ZINC FINGER PROTEIN 217                 |
| 51222  | ZNF219  | ZNF219  | ZINC FINGER PROTEIN 219                 |
| 7570   | ZNF22   | ZNF22   | ZINC FINGER PROTEIN 22 (KOX 15)         |
| 7638   | ZNF221  | ZNF221  | ZINC FINGER PROTEIN 221                 |
| 7673   | ZNF222  | ZNF222  | ZINC FINGER PROTEIN 222                 |
| 7766   | ZNF223  | ZNF223  | ZINC FINGER PROTEIN 223                 |
| 7767   | ZNF224  | ZNF224  | ZINC FINGER PROTEIN 224                 |
| 7768   | ZNF225  | ZNF225  | ZINC FINGER PROTEIN 225                 |
| 7769   | ZNF226  | ZNF226  | ZINC FINGER PROTEIN 226                 |
| 7770   | ZNF227  | ZNF227  | ZINC FINGER PROTEIN 227                 |
| 7771   | ZNF228  | ZNF228  | ZINC FINGER PROTEIN 228                 |
| 7772   | ZNF229  | ZNF229  | ZINC FINGER PROTEIN 229                 |
| 7773   | ZNF230  | ZNF230  | ZINC FINGER PROTEIN 230                 |
| 7775   | ZNF232  | ZNF232  | ZINC FINGER PROTEIN 232                 |
| 10780  | ZNF234  | ZNF234  | ZINC FINGER PROTEIN 234                 |
| 9310   | ZNF235  | ZNF235  | ZINC FINGER PROTEIN 235                 |
| 7776   | ZNF236  | ZNF236  | ZINC FINGER PROTEIN 236                 |
| 10472  | ZNF238  | ZNF238  | ZINC FINGER PROTEIN 238                 |
| 8187   | ZNF239  | ZNF239  | ZINC FINGER PROTEIN 239                 |
| 7572   | ZNF24   | ZNF24   | ZINC FINGER PROTEIN 24 (KOX 17)         |
| 57209  | ZNF248  | ZNF248  | ZINC FINGER PROTEIN 248                 |
| 219749 | ZNF25   | ZNF25   | ZINC FINGER PROTEIN 25 (KOX 19)         |
| 58500  | ZNF250  | ZNF250  | ZINC FINGER PROTEIN 250                 |
| 90987  | ZNF251  | ZNF251  | ZINC FINGER PROTEIN 251                 |
| 56242  | ZNF253  | ZNF253  | ZINC FINGER PROTEIN 253                 |
| 9534   | ZNF254  | ZNF254  | ZINC FINGER PROTEIN 254                 |
| 10172  | ZNF256  | ZNF256  | ZINC FINGER PROTEIN 256                 |
| 113835 | ZNF257  | ZNF257  | ZINC FINGER PROTEIN 257                 |
| 7574   | ZNF26   | ZNF26   | ZINC FINGER PROTEIN 26 (KOX 20)         |
| 10127  | ZNF263  | ZNF263  | ZINC FINGER PROTEIN 263                 |
| 9422   | ZNF264  | ZNF264  | ZINC FINGER PROTEIN 264                 |
| 9406   | ZNF265  | ZNF265  | ZINC FINGER PROTEIN 265                 |
| 10781  | ZNF266  | ZNF266  | ZINC FINGER PROTEIN 266                 |
| 10308  | ZNF267  | ZNF267  | ZINC FINGER PROTEIN 267                 |
| 10795  | ZNF268  | ZNF268  | ZINC FINGER PROTEIN 268                 |
| 7575   | ZNF27   | ZNF27   | ZINC FINGER PROTEIN 27 (KOX 22)         |
| 10778  | ZNF271  | ZNF271  | ZINC FINGER PROTEIN 271                 |
| 10794  | ZNF272  | ZNF272  | ZINC FINGER PROTEIN 272                 |
| 10793  | ZNF273  | ZNF273  | ZINC FINGER PROTEIN 273                 |
| 10782  | ZNF274  | ZNF274  | ZINC FINGER PROTEIN 274                 |
| 10838  | ZNF275  | ZNF275  | ZINC FINGER PROTEIN 275                 |
| 92822  | ZNF276  | ZNF276  | ZINC FINGER PROTEIN 276                 |
| 11179  | ZNF277  | ZNF277  | ZINC FINGER PROTEIN 277                 |
| 23598  | ZNF278  | ZNF278  | ZINC FINGER PROTEIN 278                 |
| 23528  | ZNF281  | ZNF281  | ZINC FINGER PROTEIN 281                 |
| 8427   | ZNF282  | ZNF282  | ZINC FINGER PROTEIN 282                 |
| 284349 | ZNF283  | ZNF283  | ZINC FINGER PROTEIN 283                 |
| 26974  | ZNF285  | ZNF285  | ZINC FINGER PROTEIN 285                 |
| 57335  | ZNF286  | ZNF286  | ZINC FINGER PROTEIN 286                 |
| 57336  | ZNF287  | ZNF287  | ZINC FINGER PROTEIN 287                 |
| 7577   | ZNF29   | ZNF29   | ZINC FINGER PROTEIN 29 (KOX 26)         |
| 23036  | ZNF292  | ZNF292  | ZINC FINGER PROTEIN 292                 |
| 49854  | ZNF295  | ZNF295  | ZINC FINGER PROTEIN 295                 |
| 9278   | ZBTB22  | ZNF297  | ZINC FINGER PROTEIN 297                 |
| 23099  | ZBTB43  | ZNF297B | ZINC FINGER PROTEIN 297B                |
| 7551   | ZNF3    | ZNF3    | ZINC FINGER PROTEIN 3 (A8-51)           |
| 90075  | ZNF30   | ZNF30   | ZINC FINGER PROTEIN 30 (KOX 28)         |
| 91975  | ZNF300  | ZNF300  | ZINC FINGER PROTEIN 300                 |
| 55900  | ZNF302  | ZNF302  | ZINC FINGER PROTEIN ZNF140-LIKE PROTEIN |
| 57343  | ZNF304  | ZNF304  | ZINC FINGER PROTEIN 304                 |
| 80317  | ZNF306  | ZNF306  | ZINC FINGER PROTEIN 306                 |
| 387032 | ZNF307  | ZNF307  | ZINC FINGER PROTEIN 307                 |
| 282890 | ZNF311  | ZNF311  | ZINC FINGER PROTEIN 311                 |
| 57693  | ZNF317  | ZNF317  | ZINC FINGER PROTEIN 317                 |
| 57697  | ZNF319  | ZNF319  | ZINC FINGER PROTEIN 319                 |
| 7590   | ZNF32   | ZNF32   | ZINC FINGER PROTEIN 32 (KOX 30)         |
| 64288  | ZNF323  | ZNF323  | ZINC FINGER PROTEIN 323                 |
| 25799  | ZNF324  | ZNF324  | ZINC FINGER PROTEIN 324                 |
| 284695 | ZNF326  | ZNF326  | ZINC FINGER PROTEIN 326                 |
| 55422  | ZNF331  | ZNF331  | ZINC FINGER PROTEIN 331                 |
| 84449  | ZNF333  | ZNF333  | ZINC FINGER PROTEIN 333                 |
| 55713  | ZNF334  | ZNF334  | ZINC FINGER PROTEIN 334                 |
| 63925  | ZNF335  | ZNF335  | ZINC FINGER PROTEIN 335                 |
| 64412  | GZF1    | ZNF336  | ZINC FINGER PROTEIN 336                 |
| 26152  | ZNF337  | ZNF337  | ZINC FINGER PROTEIN 337                 |
| 7581   | ZNF33A  | ZNF33A  | ZINC FINGER PROTEIN 33A                 |
| 80778  | ZNF34   | ZNF34   | ZINC FINGER PROTEIN 34 (KOX 32)         |
| 84905  | ZNF341  | ZNF341  | ZINC FINGER PROTEIN 341                 |
| 162979 | ZNF342  | ZNF342  | ZINC FINGER PROTEIN 342                 |
| 79175  | ZNF343  | ZNF343  | ZINC FINGER PROTEIN 343                 |
| 25850  | ZNF345  | ZNF345  | ZINC FINGER PROTEIN 345                 |
| 84671  | ZNF347  | ZNF347  | ZINC FINGER PROTEIN 347                 |
| 7584   | ZNF35   | ZNF35   | ZINC FINGER PROTEIN 35 (CLONE HF.10)    |
| 59348  | ZNF350  | ZNF350  | ZINC FINGER PROTEIN 350                 |
| 6940   | ZNF354A | ZNF354A | ZINC FINGER PROTEIN 354A                |
| 117808 | ZNF354B | ZNF354B | ZINC FINGER PROTEIN 354B                |
| 30832  | ZNF354C | ZNF354C | ZINC FINGER PROTEIN 354C                |
| 140467 | ZNF358  | ZNF358  | ZINC FINGER PROTEIN 358                 |
| 167465 | ZNF366  | ZNF366  | ZINC FINGER PROTEIN 366                 |
| 7587   | ZNF37A  | ZNF37A  | ZINC FINGER PROTEIN 37A (KOX 21)        |
| 7589   | ZNF38   | ZNF38   | ZINC FINGER PROTEIN 38                  |
| 84911  | ZNF382  | ZNF382  | ZINC FINGER PROTEIN 382                 |
| 163087 | ZNF383  | ZNF383  | ZINC FINGER PROTEIN 383                 |
| 171017 | ZNF384  | ZNF384  | ZINC FINGER PROTEIN 384                 |
| 25946  | ZNF385  | ZNF385  | ZINC FINGER PROTEIN 385                 |
| 222696 | ZNF390  | ZNF390  | ZINC FINGER PROTEIN 390                 |
| 84124  | ZNF394  | ZNF394  | ZINC FINGER PROTEIN 394                 |
| 55893  | ZNF395  | ZNF395  | ZINC FINGER PROTEIN 395                 |
| 252884 | ZNF396  | ZNF396  | ZINC FINGER PROTEIN 396                 |
| 84307  | ZNF397  | ZNF397  | ZINC FINGER PROTEIN 397                 |
| 57541  | ZNF398  | ZNF398  | ZINC FINGER PROTEIN 398                 |
| 342908 | ZNF404  | ZNF404  | ZINC FINGER PROTEIN 404                 |
| 55628  | ZNF407  | ZNF407  | ZINC FINGER PROTEIN 407                 |

|        |           |         |                                                                    |
|--------|-----------|---------|--------------------------------------------------------------------|
| 79797  |           |         | ZINC FINGER PROTEIN 408                                            |
| 22830  | ZNF408    | ZNF408  | ZINC FINGER PROTEIN 408                                            |
| 7592   | ZNF409    | ZNF409  | ZINC FINGER PROTEIN 409                                            |
| 57862  | ZNF410    | ZNF410  | ZINC FINGER PROTEIN 410                                            |
| 55859  | ZNF416    | ZNF416  | ZINC FINGER PROTEIN 416                                            |
| 147687 | ZNF417    | ZNF417  | ZINC FINGER PROTEIN 417                                            |
| 147686 | ZNF418    | ZNF418  | ZINC FINGER PROTEIN 418                                            |
| 79744  | ZNF419    | ZNF419  | ZINC FINGER PROTEIN 419                                            |
| 7593   | ZNF42     | ZNF42   | ZINC FINGER PROTEIN 42 (MYELOID-SPECIFIC RETINOIC ACID-RESPONSIVE) |
| 147923 | ZNF420    | ZNF420  | ZINC FINGER PROTEIN 420                                            |
| 23090  | ZNF423    | ZNF423  | ZINC FINGER PROTEIN 423                                            |
| 79088  | ZNF426    | ZNF426  | ZINC FINGER PROTEIN 426                                            |
| 353988 | ZNF429    | ZNF429  | ZINC FINGER PROTEIN 429                                            |
| 7594   | ZNF43     | ZNF43   | ZINC FINGER PROTEIN 43 (HTF6)                                      |
| 80264  | ZNF430    | ZNF430  | ZINC FINGER PROTEIN 430                                            |
| 170959 | ZNF431    | ZNF431  | ZINC FINGER PROTEIN 431                                            |
| 9668   | ZNF432    | ZNF432  | ZINC FINGER PROTEIN 432                                            |
| 163059 | ZNF433    | ZNF433  | ZINC FINGER PROTEIN 433                                            |
| 54925  | ZNF434    | ZNF434  | ZINC FINGER PROTEIN 434                                            |
| 80345  | ZNF435    | ZNF435  | ZINC FINGER PROTEIN 435                                            |
| 80818  | ZNF436    | ZNF436  | ZINC FINGER PROTEIN 436                                            |
| 90594  | ZNF439    | ZNF439  | ZINC FINGER PROTEIN 439                                            |
| 51710  | ZNF44     | ZNF44   | ZINC FINGER PROTEIN 44 (KOX 7)                                     |
| 126070 | ZNF440    | ZNF440  | ZINC FINGER PROTEIN 440                                            |
| 126068 | ZNF441    | ZNF441  | ZINC FINGER PROTEIN 441                                            |
| 79973  | ZNF442    | ZNF442  | ZINC FINGER PROTEIN 442                                            |
| 10224  | ZNF443    | ZNF443  | ZINC FINGER PROTEIN 443                                            |
| 55311  | ZNF444    | ZNF444  | ZINC FINGER PROTEIN 444                                            |
| 353274 | ZNF445    | ZNF445  | ZINC FINGER PROTEIN 445                                            |
| 55663  | ZNF446    | ZNF446  | ZINC FINGER PROTEIN 446                                            |
| 65982  | ZNF447    | ZNF447  | ZINC FINGER PROTEIN 447                                            |
| 203523 | ZNF449    | ZNF449  | ZINC FINGER PROTEIN 449                                            |
| 7596   | ZNF45     | ZNF45   | ZINC FINGER PROTEIN 45                                             |
| 26036  | ZNF451    | ZNF451  | ZINC FINGER PROTEIN 451                                            |
| 285676 | ZNF454    | ZNF454  | ZINC FINGER PROTEIN 454                                            |
| 58499  | ZNF462    | ZNF462  | ZINC FINGER PROTEIN 462                                            |
| 168544 | ZNF467    | ZNF467  | ZINC FINGER PROTEIN 467                                            |
| 84627  | ZNF469    | ZNF469  | ZINC FINGER PROTEIN 469                                            |
| 57573  | ZNF471    | ZNF471  | ZINC FINGER PROTEIN 471                                            |
| 25888  | ZNF473    | ZNF473  | ZINC FINGER PROTEIN 473                                            |
| 90827  | ZNF479    | ZNF479  | ZINC FINGER PROTEIN 479                                            |
| 147657 | ZNF480    | ZNF480  | ZINC FINGER PROTEIN 480                                            |
| 10773  | ZNF482    | ZNF482  | ZINC FINGER PROTEIN 482                                            |
| 158399 | ZNF483    | ZNF483  | ZINC FINGER PROTEIN 483                                            |
| 90649  | ZNF486    | ZNF486  | ZINC FINGER PROTEIN 486                                            |
| 118738 | ZNF488    | ZNF488  | ZINC FINGER PROTEIN 488                                            |
| 57474  | ZNF490    | ZNF490  | ZINC FINGER PROTEIN 490                                            |
| 126069 | ZNF491    | ZNF491  | ZINC FINGER PROTEIN 491                                            |
| 284443 | LOC115648 | ZNF493  | zinc finger protein 493                                            |
| 284443 | ZNF493    | ZNF493  | ZINC FINGER PROTEIN 493                                            |
| 84638  | ZNF496    | ZNF496  | ZINC FINGER PROTEIN 496                                            |
| 84678  | ZNF499    | ZNF499  | ZINC FINGER PROTEIN 499                                            |
| 26048  | ZNF500    | ZNF500  | ZINC FINGER PROTEIN 500                                            |
| 115560 | ZNF501    | ZNF501  | ZINC FINGER PROTEIN 501                                            |
| 91392  | ZNF502    | ZNF502  | ZINC FINGER PROTEIN 502                                            |
| 22847  | ZNF507    | ZNF507  | ZINC FINGER PROTEIN 507                                            |
| 22869  | ZNF510    | ZNF510  | ZINC FINGER PROTEIN 510                                            |
| 84450  | ZNF512    | ZNF512  | ZINC FINGER PROTEIN 512                                            |
| 57473  | GM632     | ZNF512B | zinc finger protein 512B                                           |
| 130557 | ZNF513    | ZNF513  | ZINC FINGER PROTEIN 513                                            |
| 84874  | ZNF514    | ZNF514  | ZINC FINGER PROTEIN 514                                            |
| 162555 | ZNF519    | ZNF519  | ZINC FINGER PROTEIN 519                                            |
| 147807 | ZNF524    | ZNF524  | ZINC FINGER PROTEIN 524                                            |
| 163255 | ZNF540    | ZNF540  | ZINC FINGER PROTEIN 540                                            |
| 27300  | ZNF544    | ZNF544  | ZINC FINGER PROTEIN 544                                            |
| 284406 | ZNF545    | ZNF545  | ZINC FINGER PROTEIN 545                                            |
| 339327 | ZNF546    | ZNF546  | ZINC FINGER PROTEIN 546                                            |
| 284306 | ZNF547    | ZNF547  | ZINC FINGER PROTEIN 547                                            |
| 256051 | ZNF549    | ZNF549  | ZINC FINGER PROTEIN 549                                            |
| 162972 | ZNF550    | ZNF550  | ZINC FINGER PROTEIN 550                                            |
| 90233  | ZNF551    | ZNF551  | ZINC FINGER PROTEIN 551                                            |
| 197407 | ZNF553    | ZNF553  | ZINC FINGER PROTEIN 553                                            |
| 115196 | ZNF554    | ZNF554  | ZINC FINGER PROTEIN 554                                            |
| 148254 | ZNF555    | ZNF555  | ZINC FINGER PROTEIN 555                                            |
| 80032  | ZNF556    | ZNF556  | ZINC FINGER PROTEIN 556                                            |
| 79230  | ZNF557    | ZNF557  | ZINC FINGER PROTEIN 557                                            |
| 148156 | ZNF558    | ZNF558  | ZINC FINGER PROTEIN 558                                            |
| 84527  | ZNF559    | ZNF559  | ZINC FINGER PROTEIN 559                                            |
| 147741 | ZNF560    | ZNF560  | ZINC FINGER PROTEIN 560                                            |
| 147837 | ZNF563    | ZNF563  | ZINC FINGER PROTEIN 563                                            |
| 163050 | ZNF564    | ZNF564  | ZINC FINGER PROTEIN 564                                            |
| 147929 | ZNF565    | ZNF565  | ZINC FINGER PROTEIN 565                                            |
| 84924  | ZNF566    | ZNF566  | ZINC FINGER PROTEIN 566                                            |
| 163081 | ZNF567    | ZNF567  | ZINC FINGER PROTEIN 567                                            |
| 374900 | ZNF568    | ZNF568  | ZINC FINGER PROTEIN 568                                            |
| 126295 | LOC126295 | ZNF57   | zinc finger protein 47                                             |
| 148268 | ZNF570    | ZNF570  | ZINC FINGER PROTEIN 570                                            |
| 51276  | ZNF571    | ZNF571  | ZINC FINGER PROTEIN 571                                            |
| 126231 | ZNF573    | ZNF573  | ZINC FINGER PROTEIN 573                                            |
| 84765  | ZNF577    | ZNF577  | ZINC FINGER PROTEIN 577                                            |
| 147660 | ZNF578    | ZNF578  | ZINC FINGER PROTEIN 578                                            |
| 51157  | ZNF580    | ZNF580  | ZINC FINGER PROTEIN 580                                            |
| 51545  | ZNF581    | ZNF581  | ZINC FINGER PROTEIN 581                                            |
| 147948 | ZNF582    | ZNF582  | ZINC FINGER PROTEIN 582                                            |
| 147949 | ZNF583    | ZNF583  | ZINC FINGER PROTEIN 583                                            |
| 201514 | ZNF584    | ZNF584  | ZINC FINGER PROTEIN 584                                            |
| 199704 | ZNF585A   | ZNF585A | ZINC FINGER PROTEIN 585A                                           |
| 92285  | ZNF585B   | ZNF585B | ZINC FINGER PROTEIN 585B                                           |
| 54807  | ZNF586    | ZNF586  | ZINC FINGER PROTEIN 586                                            |
| 84914  | ZNF587    | ZNF587  | ZINC FINGER PROTEIN 587                                            |
| 51427  | ZNF588    | ZNF588  | ZINC FINGER PROTEIN 588                                            |
| 51385  | ZNF589    | ZNF589  | ZINC FINGER PROTEIN 589                                            |
| 9640   | ZNF592    | ZNF592  | ZINC FINGER PROTEIN 592                                            |
| 51042  | ZNF593    | ZNF593  | ZINC FINGER PROTEIN 593                                            |
| 152687 | ZNF595    | ZNF595  | ZINC FINGER PROTEIN 595                                            |
| 169270 | ZNF596    | ZNF596  | ZINC FINGER PROTEIN 596                                            |
| 146434 | ZNF597    | ZNF597  | ZINC FINGER PROTEIN 597                                            |
| 148103 | ZNF599    | ZNF599  | ZINC FINGER PROTEIN 599                                            |
| 7552   | ZNF6      | ZNF6    | ZINC FINGER PROTEIN 6 (CMPX1)                                      |
| 80095  | ZNF606    | ZNF606  | ZINC FINGER PROTEIN 606                                            |
| 162963 | ZNF610    | ZNF610  | ZINC FINGER PROTEIN 610                                            |
| 81856  | ZNF611    | ZNF611  | ZINC FINGER PROTEIN 611                                            |
| 79898  | ZNF613    | ZNF613  | ZINC FINGER PROTEIN 613                                            |
| 284370 | ZNF615    | ZNF615  | ZINC FINGER PROTEIN 615                                            |
| 9831   | ZNF623    | ZNF623  | ZINC FINGER PROTEIN 623                                            |
| 57547  | ZNF624    | ZNF624  | ZINC FINGER PROTEIN 624                                            |
| 199777 | ZNF626    | ZNF626  | ZINC FINGER PROTEIN 626                                            |
| 199692 | ZNF627    | ZNF627  | ZINC FINGER PROTEIN 627                                            |
| 27332  | ZNF638    | ZNF638  | ZINC FINGER PROTEIN 638                                            |
| 51193  | ZNF639    | ZNF639  | ZINC FINGER PROTEIN 639                                            |
| 121274 | ZNF641    | ZNF641  | ZINC FINGER PROTEIN 641                                            |
| 84146  | ZNF644    | ZNF644  | ZINC FINGER PROTEIN 644                                            |
| 9726   | ZNF646    | ZNF646  | ZINC FINGER PROTEIN 646                                            |
| 65251  | ZNF649    | ZNF649  | ZINC FINGER PROTEIN 649                                            |
| 115950 | ZNF653    | ZNF653  | ZINC FINGER PROTEIN 653                                            |
| 79027  | ZNF655    | ZNF655  | ZINC FINGER PROTEIN 655                                            |
| 79862  | ZNF669    | ZNF669  | ZINC FINGER PROTEIN 669                                            |
| 93474  | ZNF670    | ZNF670  | ZINC FINGER PROTEIN 670                                            |
| 79891  | ZNF671    | ZNF671  | ZINC FINGER PROTEIN 671                                            |

|        |              |         |                                                                            |
|--------|--------------|---------|----------------------------------------------------------------------------|
| 55634  | ZNF673       | ZNF673  | ZINC FINGER PROTEIN 673                                                    |
| 171392 | ZNF675       | ZNF675  | ZINC FINGER PROTEIN 675                                                    |
| 342326 | ZNF677       | ZNF677  | ZINC FINGER PROTEIN 677                                                    |
| 168417 | ZNF679       | ZNF679  | ZINC FINGER PROTEIN 679                                                    |
| 146542 | ZNF688       | ZNF688  | ZINC FINGER PROTEIN 688                                                    |
| 115509 | ZNF689       | ZNF689  | ZINC FINGER PROTEIN 689                                                    |
| 57116  | ZNF695       | ZNF695  | ZINC FINGER PROTEIN 695                                                    |
| 7553   | ZNF7         | ZNF7    | ZINC FINGER PROTEIN 7 (KOX 4, CLONE HF.16)                                 |
| 7621   | ZNF70        | ZNF70   | ZINC FINGER PROTEIN 70 (COS17)                                             |
| 90592  | ZNF700       | ZNF700  | ZINC FINGER PROTEIN 700                                                    |
| 286075 | ZNF707       | ZNF707  | ZINC FINGER PROTEIN 707                                                    |
| 7562   | ZNF708       | ZNF708  | ZINC FINGER PROTEIN 708 (KOX8)                                             |
| 163051 | ZNF709       | ZNF709  | ZINC FINGER PROTEIN 709                                                    |
| 58491  | ZNF71        | ZNF71   | ZINC FINGER PROTEIN 71 (COS26)                                             |
| 349075 | ZNF713       | ZNF713  | ZINC FINGER PROTEIN 713                                                    |
| 148206 | ZNF714       | ZNF714  | ZINC FINGER PROTEIN 714                                                    |
| 148203 | LOC148203    | ZNF738  | zinc finger protein 738                                                    |
| 7625   | ZNF74        | ZNF74   | ZINC FINGER PROTEIN 74 (COS52)                                             |
| 7626   | ZNF75        | ZNF75   | ZINC FINGER PROTEIN 75 (D8C6)                                              |
| 7627   | ZNF75A       | ZNF75A  | ZINC FINGER PROTEIN 75A                                                    |
| 7629   | ZNF76        | ZNF76   | ZINC FINGER PROTEIN 76 (EXPRESSED IN TESTIS)                               |
| 92595  | MGC13138     | ZNF764  | zinc finger protein 764                                                    |
| 91661  | LOC91661     | ZNF765  | zinc finger protein 765                                                    |
| 90321  | LOC90321     | ZNF766  | zinc finger protein 766                                                    |
| 79724  | FLJ23436     | ZNF768  | zinc finger protein 768                                                    |
| 58492  | ZNF77        | ZNF77   | ZINC FINGER PROTEIN 77 (PT1)                                               |
| 197320 | FLJ31875     | ZNF778  | zinc finger protein 778                                                    |
| 146540 | FLJ32130     | ZNF785  | zinc finger protein 785                                                    |
| 136051 | DKFZp7621137 | ZNF786  | zinc finger protein 786                                                    |
| 7633   | ZNF79        | ZNF79   | ZINC FINGER PROTEIN 79 (PT7)                                               |
| 7554   | ZNF8         | ZNF8    | ZINC FINGER PROTEIN 8 (CLONE HF.18)                                        |
| 7634   | ZNF80        | ZNF80   | ZINC FINGER PROTEIN 80 (PT17)                                              |
| 347344 | ZNF81        | ZNF81   | ZINC FINGER PROTEIN 81 (HF220)                                             |
| 55769  | ZNF83        | ZNF83   | ZINC FINGER PROTEIN 83 (HPF1)                                              |
| 7637   | ZNF84        | ZNF84   | ZINC FINGER PROTEIN 84 (HPF2)                                              |
| 7639   | ZNF85        | ZNF85   | ZINC FINGER PROTEIN 85 (HPF4, HTF1)                                        |
| 7555   | ZNF9         | ZNF9    | ZINC FINGER PROTEIN 9 (A CELLULAR RETROVIRAL NUCLEIC ACID BINDING PROTEIN) |
| 7643   | ZNF90        | ZNF90   | ZINC FINGER PROTEIN 90                                                     |
| 7644   | ZNF91        | ZNF91   | ZINC FINGER PROTEIN 91 (HPF7, HTF10)                                       |
| 168374 | ZNF92        | ZNF92   | ZINC FINGER PROTEIN 92 (HTF12)                                             |
| 81931  | ZNF93        | ZNF93   | ZINC FINGER PROTEIN 93 (HTF34)                                             |
| 9753   | ZNF96        | ZNF96   | ZINC FINGER PROTEIN 96                                                     |
| 10320  | ZNFN1A1      | ZNFN1A1 | ZINC FINGER PROTEIN, SUBFAMILY 1A, 1 (IKAROS)                              |
| 22807  | ZNFN1A2      | ZNFN1A2 | ZINC FINGER PROTEIN, SUBFAMILY 1A, 2 (HELLOS)                              |
| 22806  | ZNFN1A3      | ZNFN1A3 | ZINC FINGER PROTEIN, SUBFAMILY 1A, 3 (AIOLOS)                              |
| 57169  | ZNFX1        | ZNFX1   | ZINC FINGER, NFX1-TYPE CONTAINING 1                                        |
| 9326   | ZNHIT3       | ZNHIT3  | ZINC FINGER, HIT TYPE 3                                                    |
| 30834  | ZNRD1        | ZNRD1   | ZINC RIBBON DOMAIN CONTAINING, 1                                           |
| 27000  | ZRF1         | ZRF1    | ZUOTIN RELATED FACTOR 1                                                    |
| 284312 | ZSCAN1       | ZSCAN1  | ZINC FINGER AND SCAN DOMAIN CONTAINING 1                                   |
| 54993  | ZSCAN2       | ZSCAN2  | ZINC FINGER AND SCAN DOMAIN CONTAINING 2                                   |
| 201516 | ZSCAN4       | ZSCAN4  | ZINC FINGER AND SCAN DOMAIN CONTAINING 4                                   |
| 79149  | ZSCAN5       | ZSCAN5  | ZINC FINGER AND SCAN DOMAIN CONTAINING 5                                   |
| 65249  | ZSWIM4       | ZSWIM4  | ZINC FINGER, SWIM-TYPE CONTAINING 4                                        |
| 26009  | ZZZ3         | ZZZ3    | ZINC FINGER, ZZ-TYPE CONTAINING 3                                          |
