# Supplementary material for: Reconstruction of Monocyte Transcriptional Regulatory Network Accompanies Monocytic Functions in Human Fibroblasts
Source: PubMed Central journal article supplement (PMC3302774; doi:10.1371/journal.pone.0033474), 2012-03-13
Supplement: pone.0033474.s005.pdf [file pone.0033474.s005.pdf]

Table S3 Primer sequences for qRT-PCR

| Primer ID                       | Sequence                  |
|---------------------------------|---------------------------|
| Matrix over expression analysis |                           |
| FOS_UTR_F                       | TCTGTGCGTGAAACACACCA      |
| FOS_UTR_R                       | ACTCCATGCGTTTTGCTACATC    |
| FOSB_UTR_F                      | CTTTTCTCCTCCGCCTGTGT      |
| FOSB_UTR_R                      | CTCATGTCCCAACGAACC        |
| IRF8_UTR_F                      | GGCATTCTCGGAGGAGTAGA      |
| IRF8_UTR_R                      | GTTACAGCATCCAGGCCATC      |
| SPI1_UTR_F                      | CCGCTGGCCATAGCATT         |
| SPI1_UTR_R                      | CGCCACAGTCCTGCCTCT        |
| MAFB_UTR_F                      | TCCTGGCTTTCTGAACTTTGC     |
| MAFB_UTR_R                      | TCTCCTTTCCTCGTTGCTCTCT    |
| JUNB_UTR2_F                     | GAAACGACGCCAGGAAAGC       |
| JUNB_UTR2_R                     | TGTGCGCAAAGCCCTGT         |
| EGR2_UTR_F                      | GGCTCAGAAGGAGGTGGTGT      |
| EGR2_UTR_R                      | CAAATAAGGGGAAGTGGGGTAG    |
| MAF_UTR_F                       | TCATGCTTCATTGTTTCTCTGG    |
| MAF_UTR_R                       | CTCTGCCCCGTGGATTTGTT      |
| CEBPA_UTR_F                     | CAGAGGGACCGGAGTTATGA      |
| CEBPA_UTR_R                     | TTCACATTGCACAAGGCACT      |
| HCLS1_UTR_F                     | CAGCAGCTCAGTTTCTCACTCC    |
| HCLS1_UTR_R                     | CACCTGTGCAAGCCTCTGTT      |
| BTG2_UTR_F                      | GAGGGTCTGGAGGAAAAGTGG     |
| BTG2_UTR_R                      | CCCAAGGAGAGCAGGAGAGA      |
| MXD1_UTR_F                      | CATCCCTAGAATTGGTGCTCTTG   |
| MXD1_UTR_R                      | TCATCTGCTGCTCCCCTGT       |
| STAT5A_UTR_F                    | CCTTCTTTGCTTGCTCTCTGT     |
| STAT5A_UTR_R                    | CCTGTCCACCCACCATATCC      |
| ZFP36_UTR_F                     | CAAACCCACCCATAAATCAA      |
| ZFP36_UTR_R                     | AAAATACAAGGGAAGCAGACGA    |
| CREG1_UTR_F                     | TTCTCAACTGCCCAA           |
| CREG1_UTR_R                     | AATGCCATGTTCTTCCCTCT      |
| LYL1_UTR_F                      | GGACCAGTGAAGACGTCAGG      |
| LYL1_UTR_R                      | CAGAGGGTTGTGGGTGATTTT     |
| LMO2_UTR_F                      | TGACGCTTGCGAACTAGAGA      |
| LMO2_UTR_R                      | AAGCTTAAGGCCTTGGGAAG      |
| MNDA_UTR_F                      | TGGCTCTAACAAGTGCCATT      |
| MNDA_UTR_R                      | AATGGATGCTTCTCCACAA       |
| NR4A2_UTR_F                     | CTTCGGCAGAGTTGAATGAATG    |
| NR4A2_UTR_R                     | AAAAGCAATGGGGAGTCCAG      |
| LPS response                    |                           |
| TNF_F                           | GCCTGCTGCACTTTGGAGT       |
| TNF_R                           | CTCGGGGTTGAGAAGATG        |
| IL6_F                           | CACCTCTTCAGAACGAATTGACA   |
| IL6_R                           | CCTCTTTGCTGCTTTCACACA     |
| IL1A_F                          | TGAAGAAGACAGTTCCTCCATTGAT |
| IL1A_R                          | CATGGAGTGGGCCATAGCTT      |
| IL1B_F                          | TTTGAAGCTGATGGCCCTAAA     |
| IL1B_R                          | GTGGTGGTTCGGAGATTCGTAG    |
| IL8_F                           | CACACTGCGCCAACACAGA       |
| IL8_R                           | CAACCCTCTGCACCCAGTTT      |
| CCL2_F                          | CAGCAGCAAGTGTCCCAA        |
| CCL2_R                          | ATGGAATCCTGAACCCACTTCT    |
| CXCL10_F                        | TTCTGCAAGCCAATTTTGT       |
| CXCL10_R                        | TGATGGCCTTCGATTCTGG       |
| IFNB1_F                         | ATCTAGCACTGGCTGGAATGAG    |
| IFNB1_R                         | CCAGGACTGTCTTCAGATGGTTT   |
